# Supplementary material for: Microwave-assisted annulation for the construction of pyrido-fused heterocycles and their application as photoluminescent chemosensors
Source: Royal Society of Chemistry journal article supplement (doi:10.1039/d2ob00257d), 2022-01-01
Supplement: d2ob00257d1.pdf [file d2ob00257d1.pdf]

## SUPPORTING INFORMATION

### **Microwave-assisted annulation for the construction of pyrido-fused heterocycles and their application as photoluminescent chemosensors**

Ei Seul Yun,<sup>‡</sup> Muhammad Saeed Akhtar,<sup>‡</sup> Sonaimuthu Mohandoss, and Yong Rok Lee\*

<sup>‡</sup>School of Chemical Engineering, Yeungnam University

Gyeongsan 38541, Republic of Korea

E-mail: [yrlee@yu.ac.kr](mailto:yrlee@yu.ac.kr)

Phone: 82-53-810-2529; Fax: 82-53-810-4631

## TABLE OF CONTENTS

|                                                                                                                       |        |
|-----------------------------------------------------------------------------------------------------------------------|--------|
| 1. <sup>1</sup> H NMR and <sup>13</sup> C NMR Spectra of Synthesized Compounds <b>3</b> , <b>5</b> and <b>7</b> ..... | S2-30  |
| 2. X-Ray Crystallography Data and Structure of Compound <b>3n</b> .....                                               | S31-42 |
| 3. Procedure for optical properties .....                                                                             | S43    |
| 4. Calculation of the photoluminescence quantum yield .....                                                           | S43-44 |
| 5. Interference effect .....                                                                                          | S44-45 |

# $^1\text{H}$ NMR and $^{13}\text{C}$ NMR spectra of the synthesized compounds

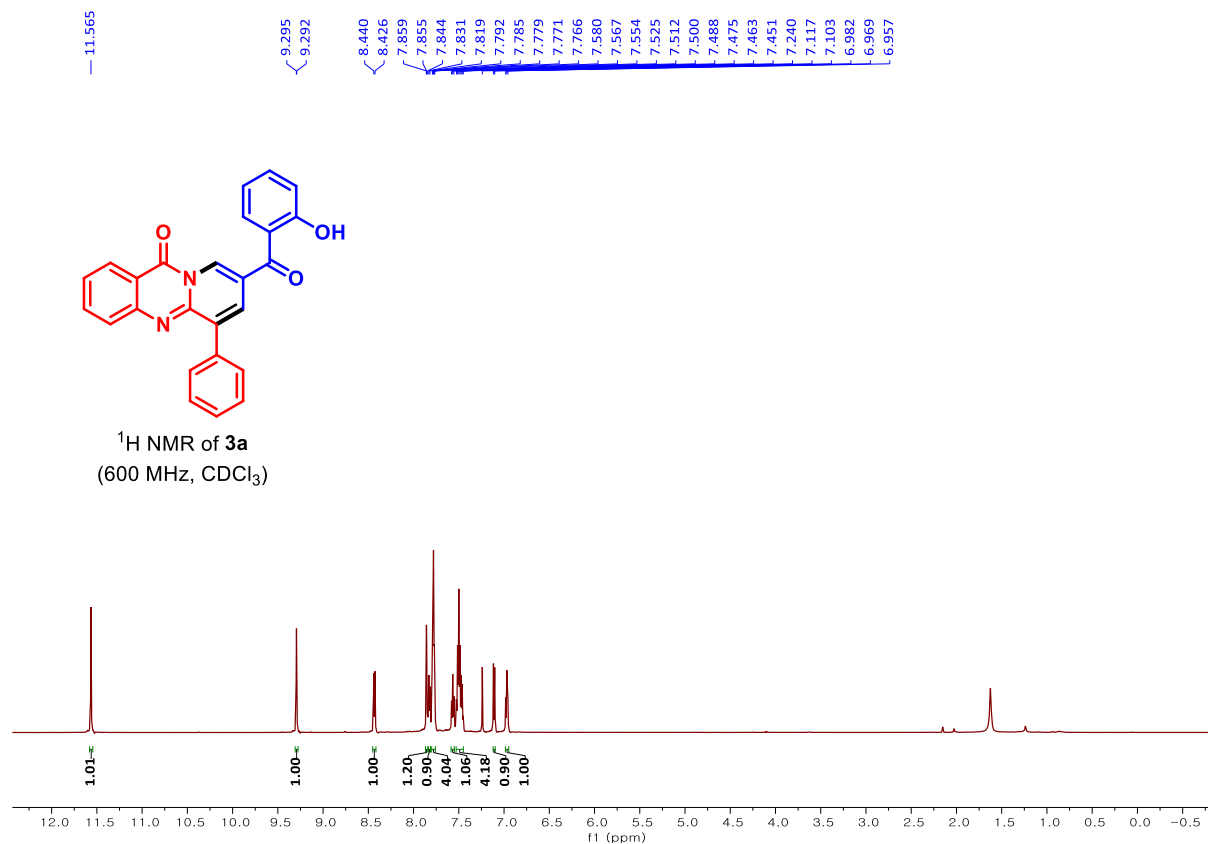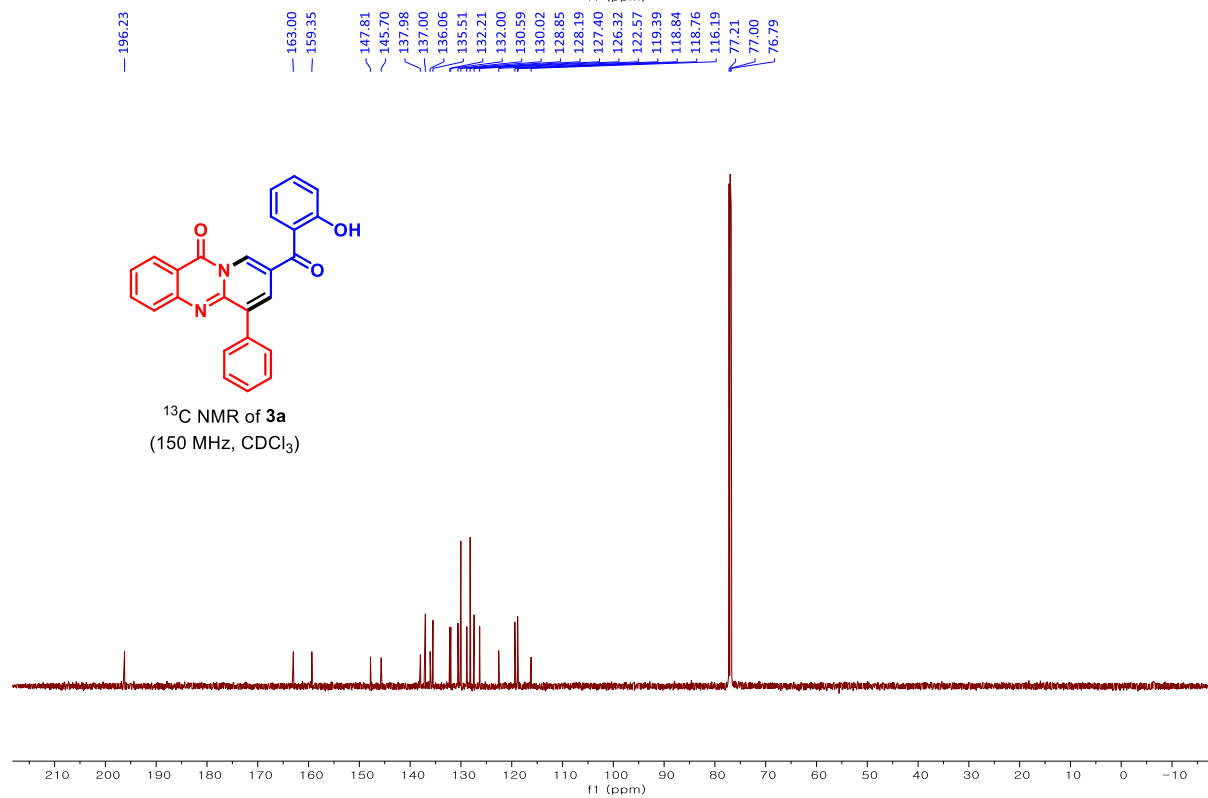

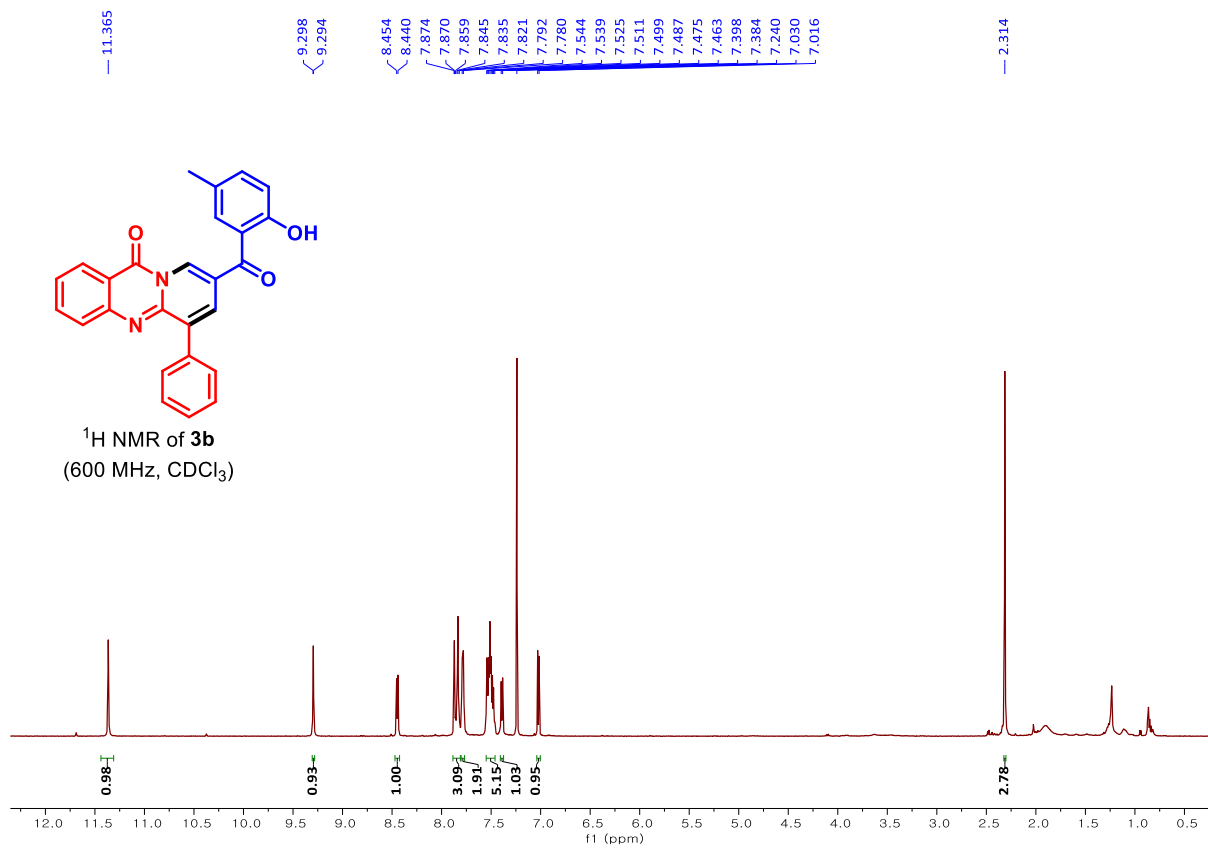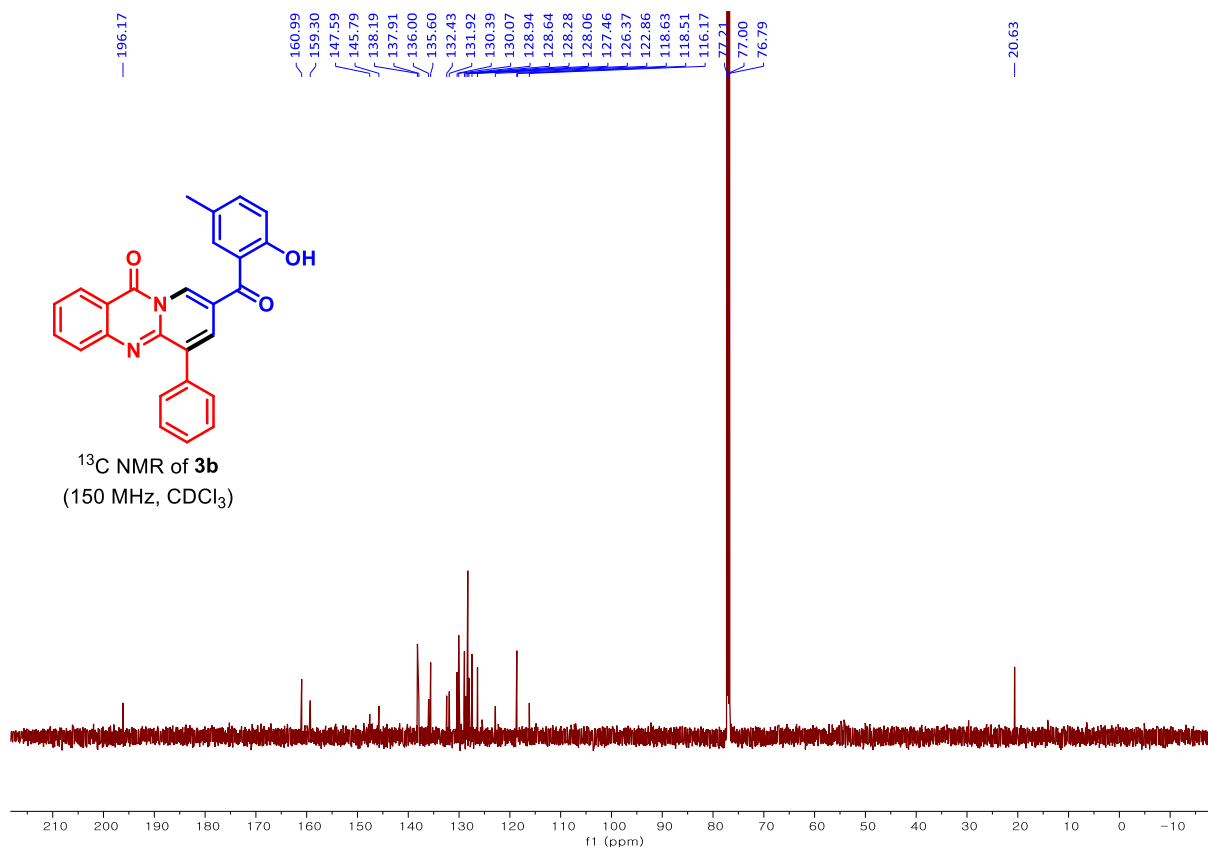

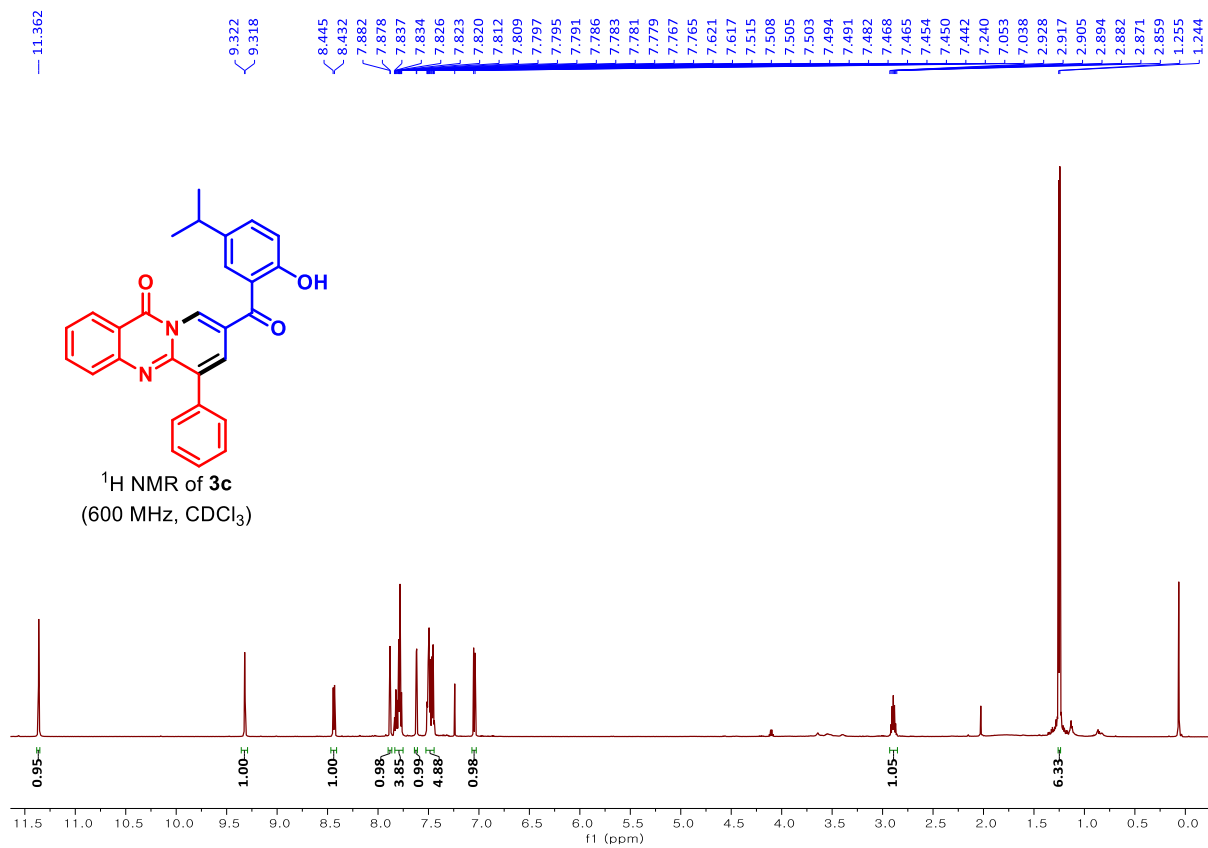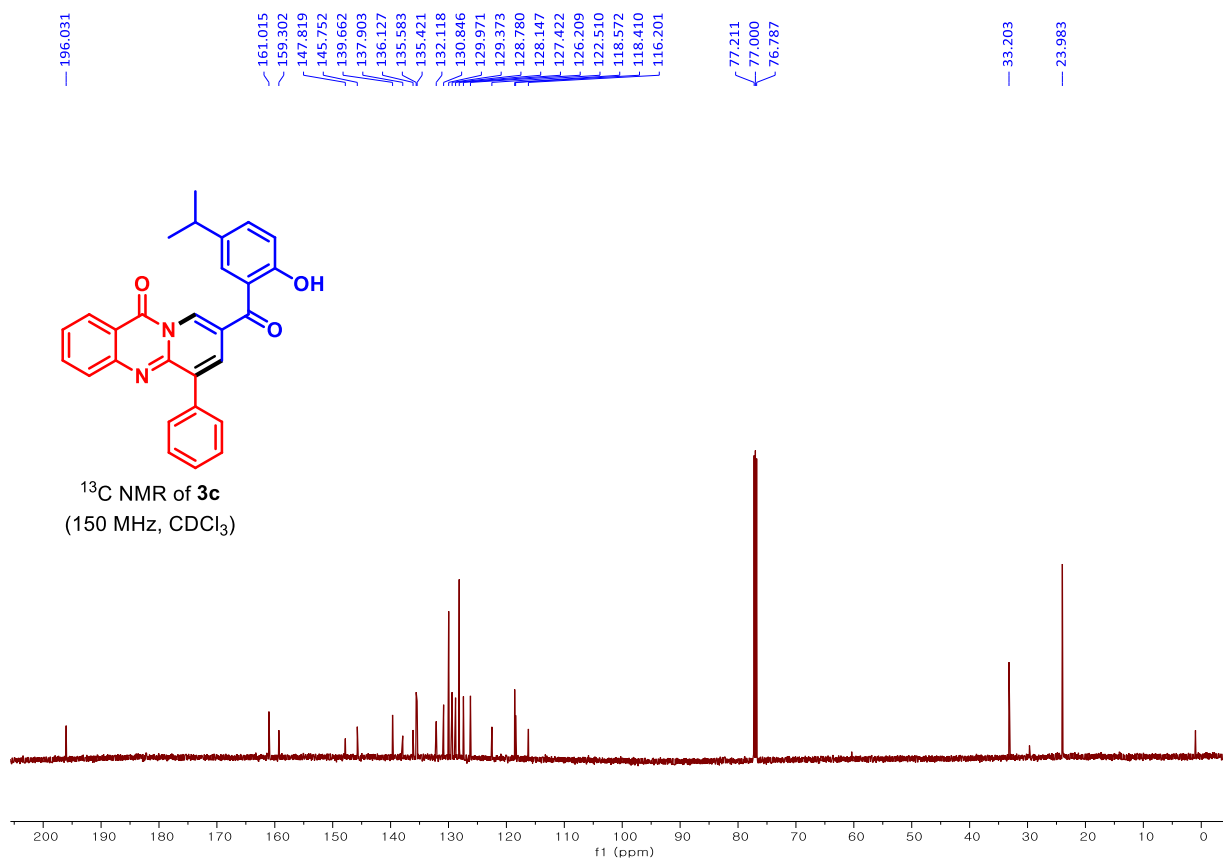

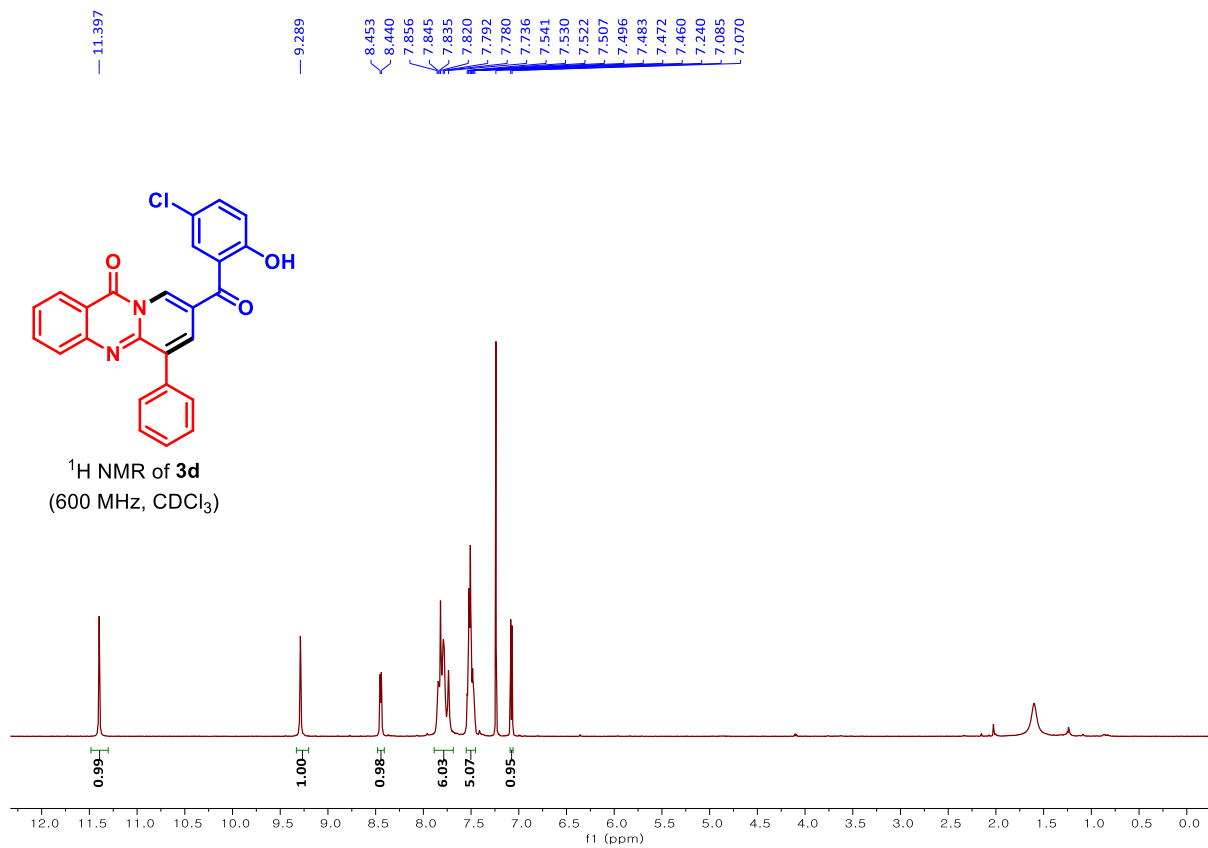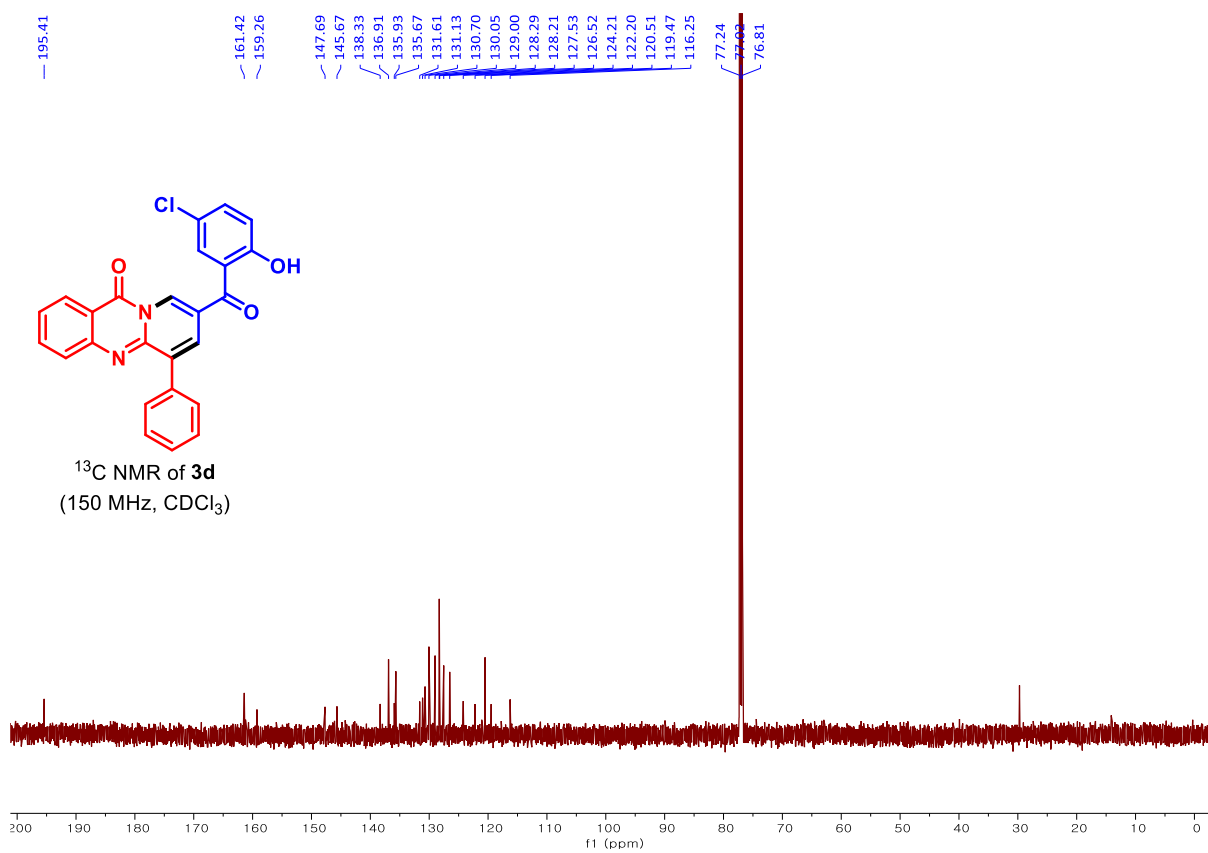

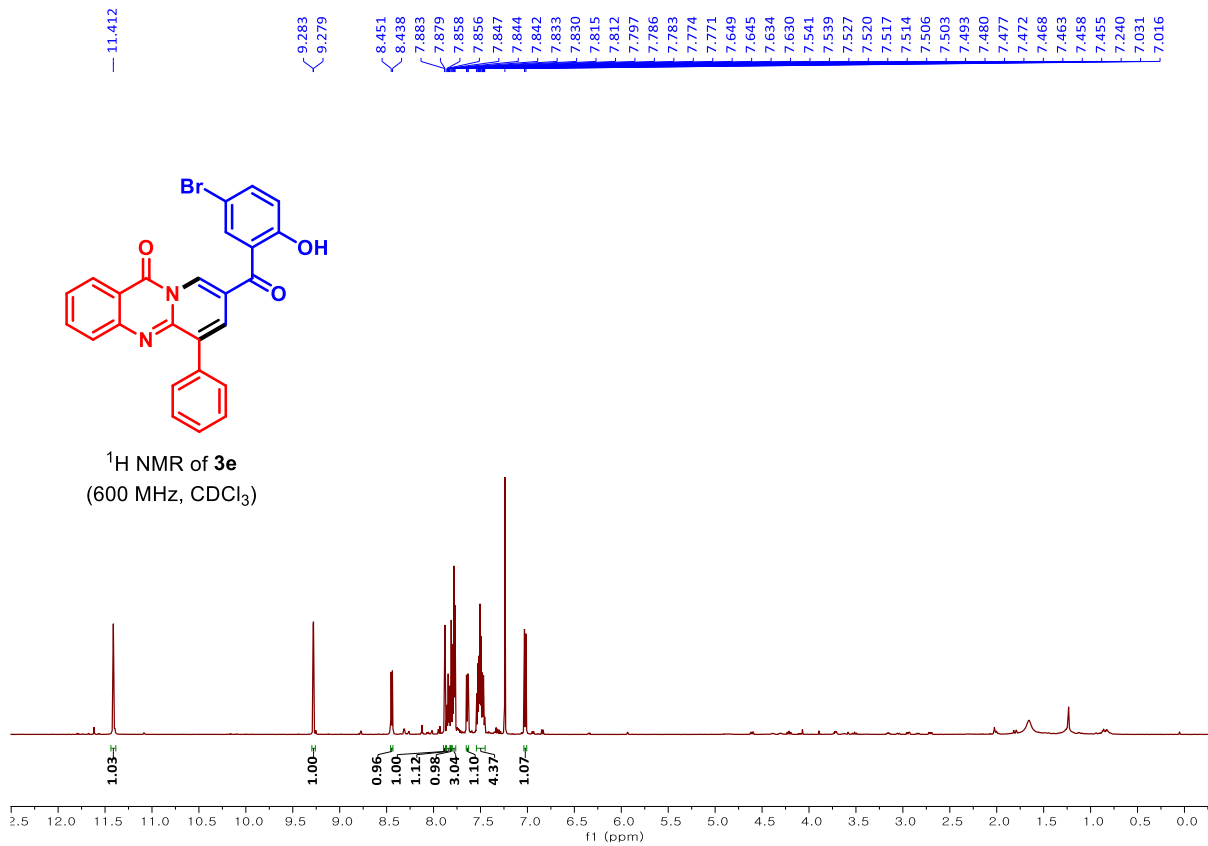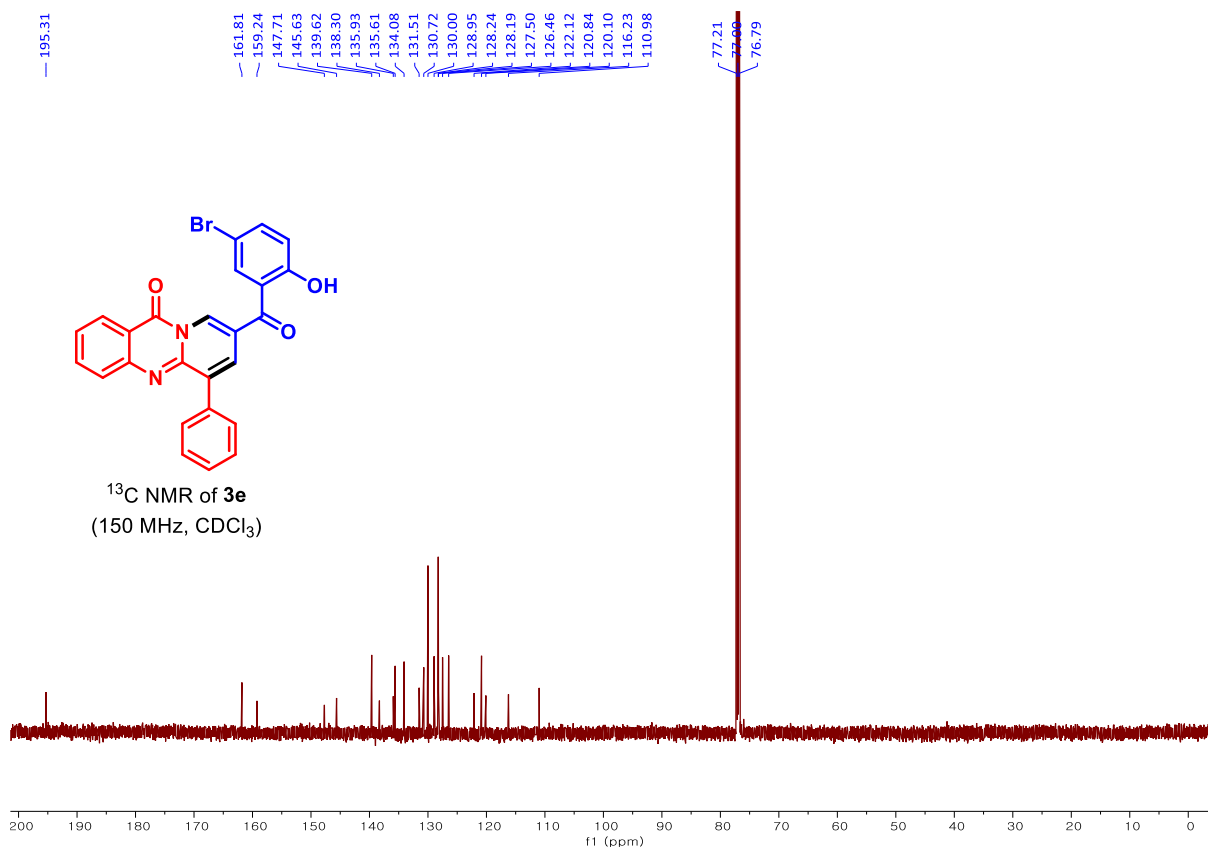

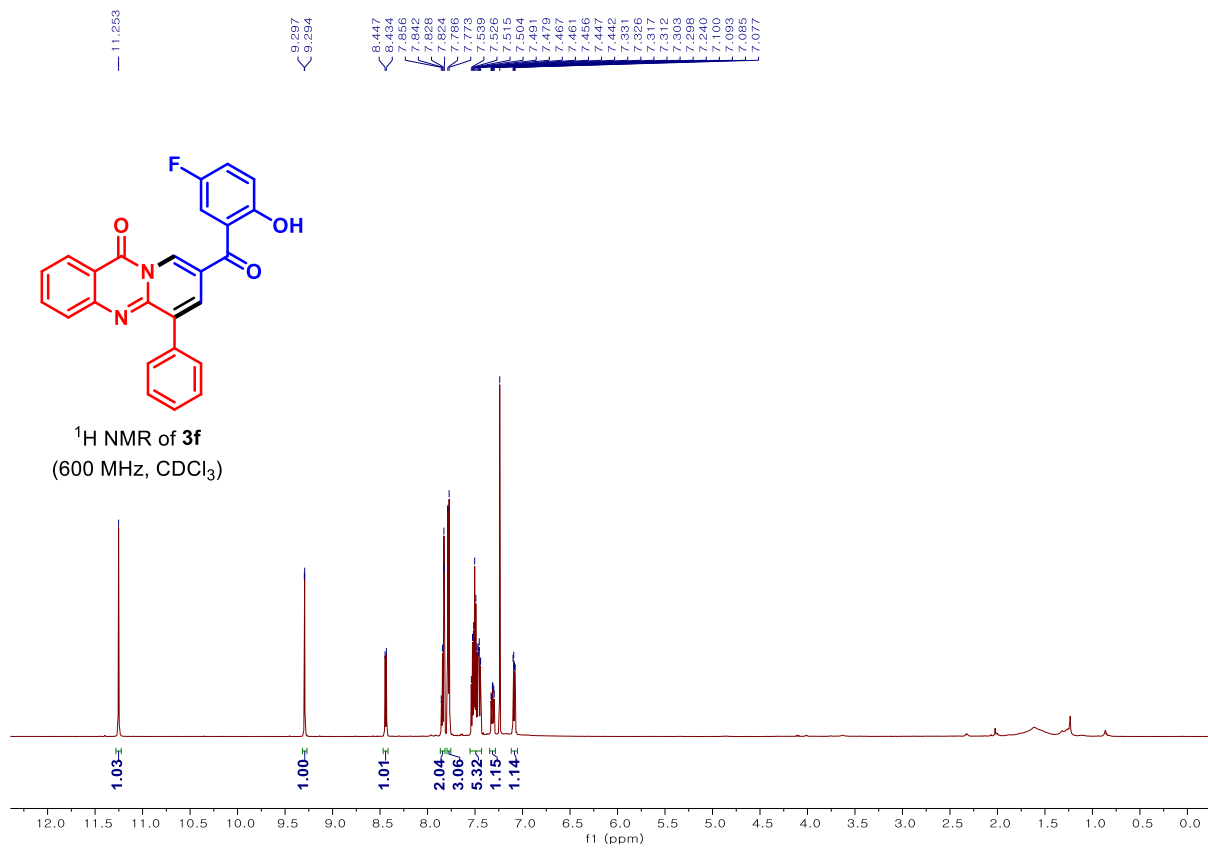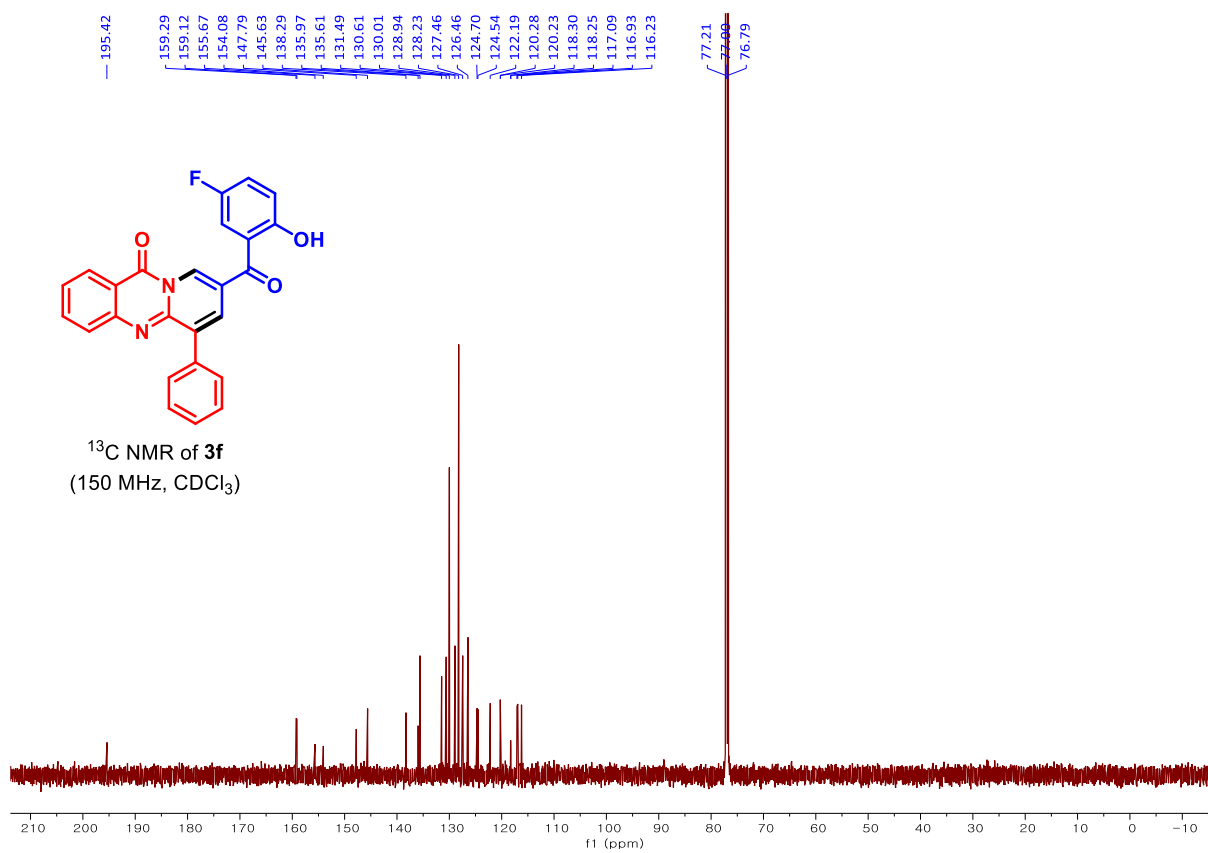

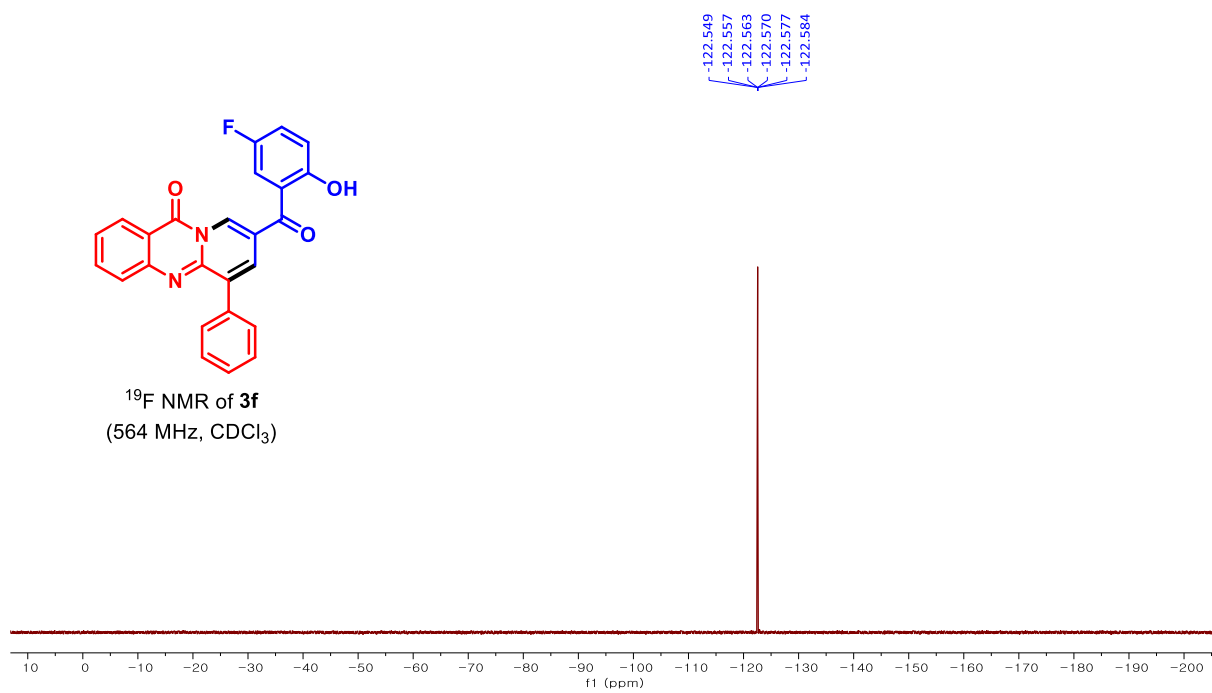



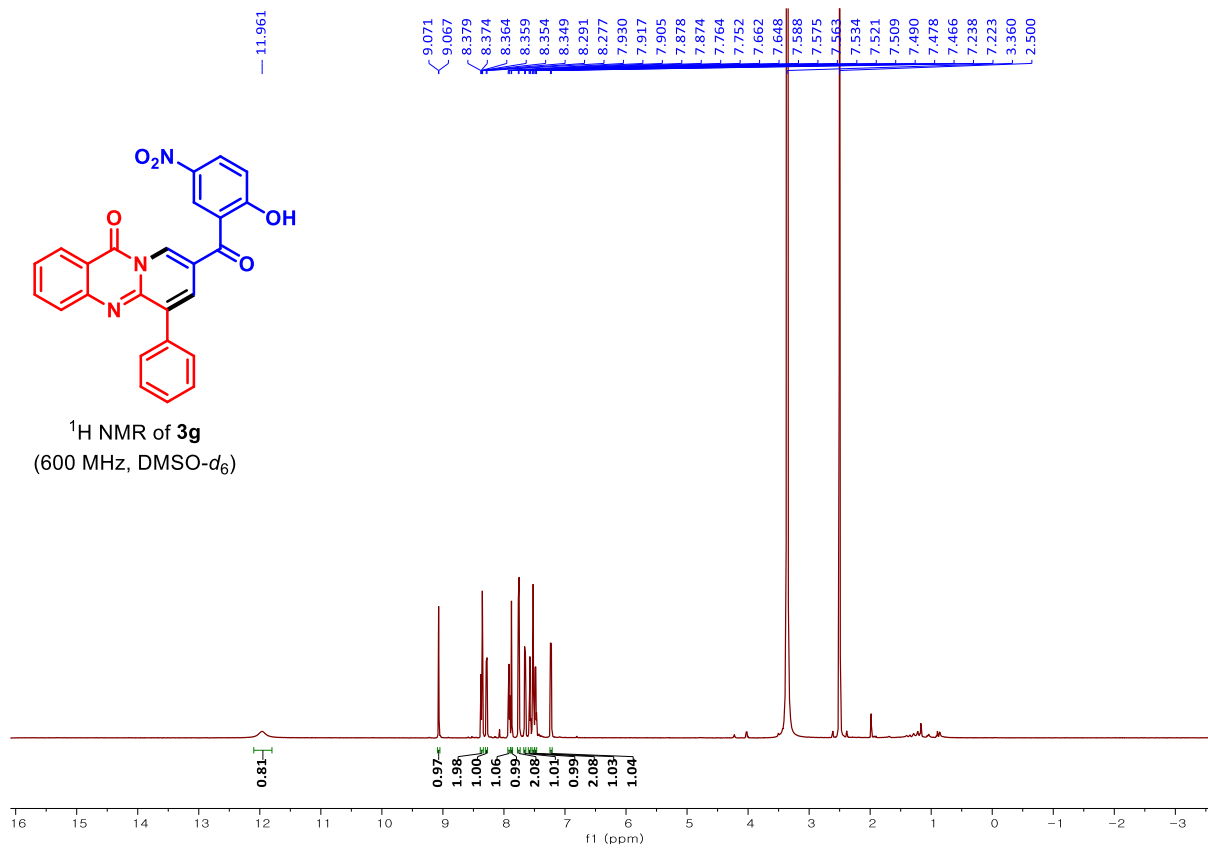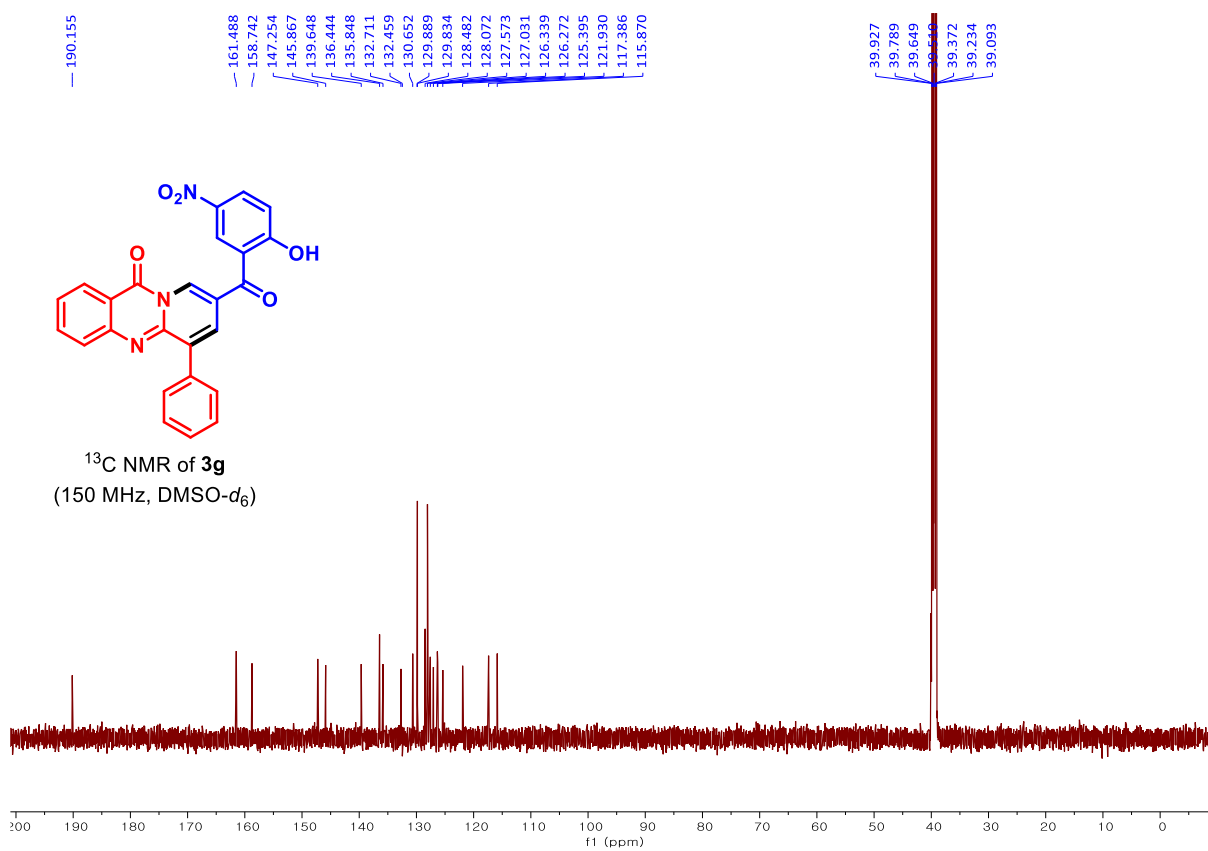

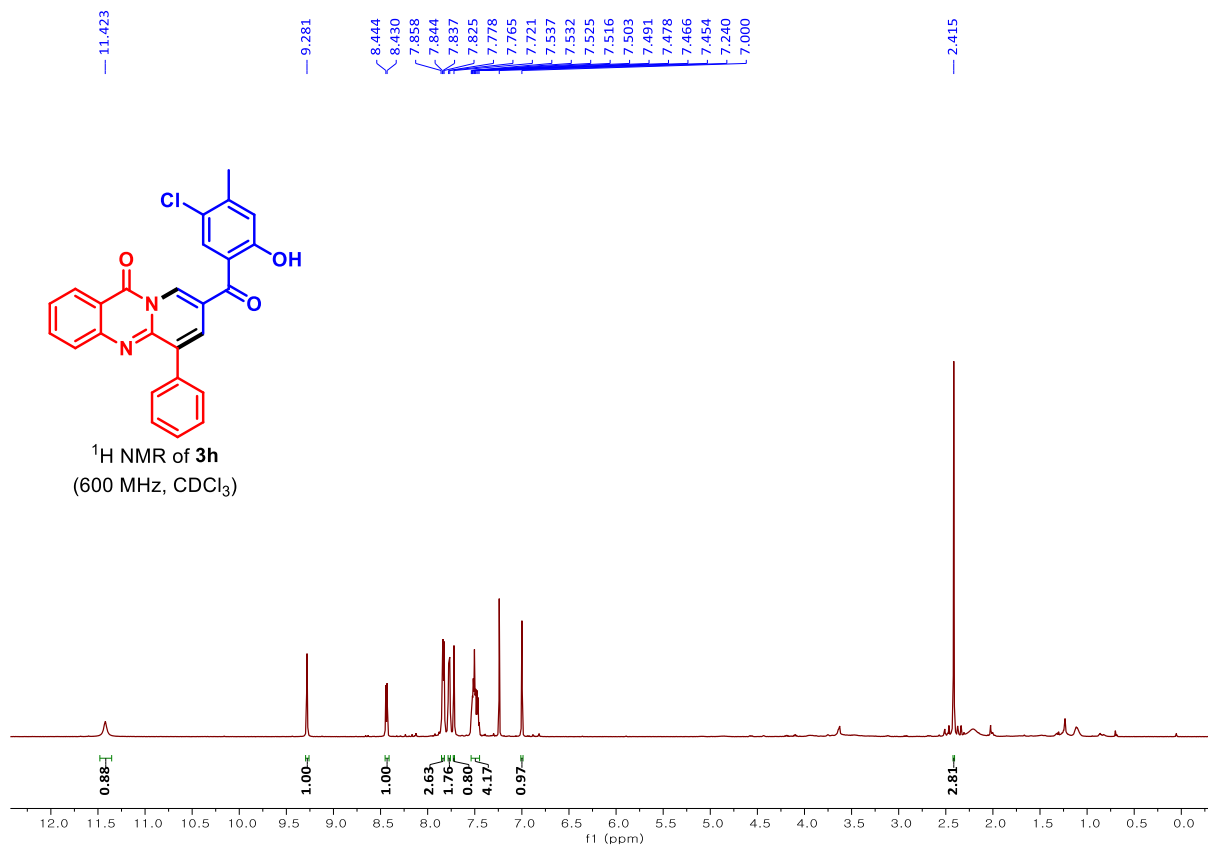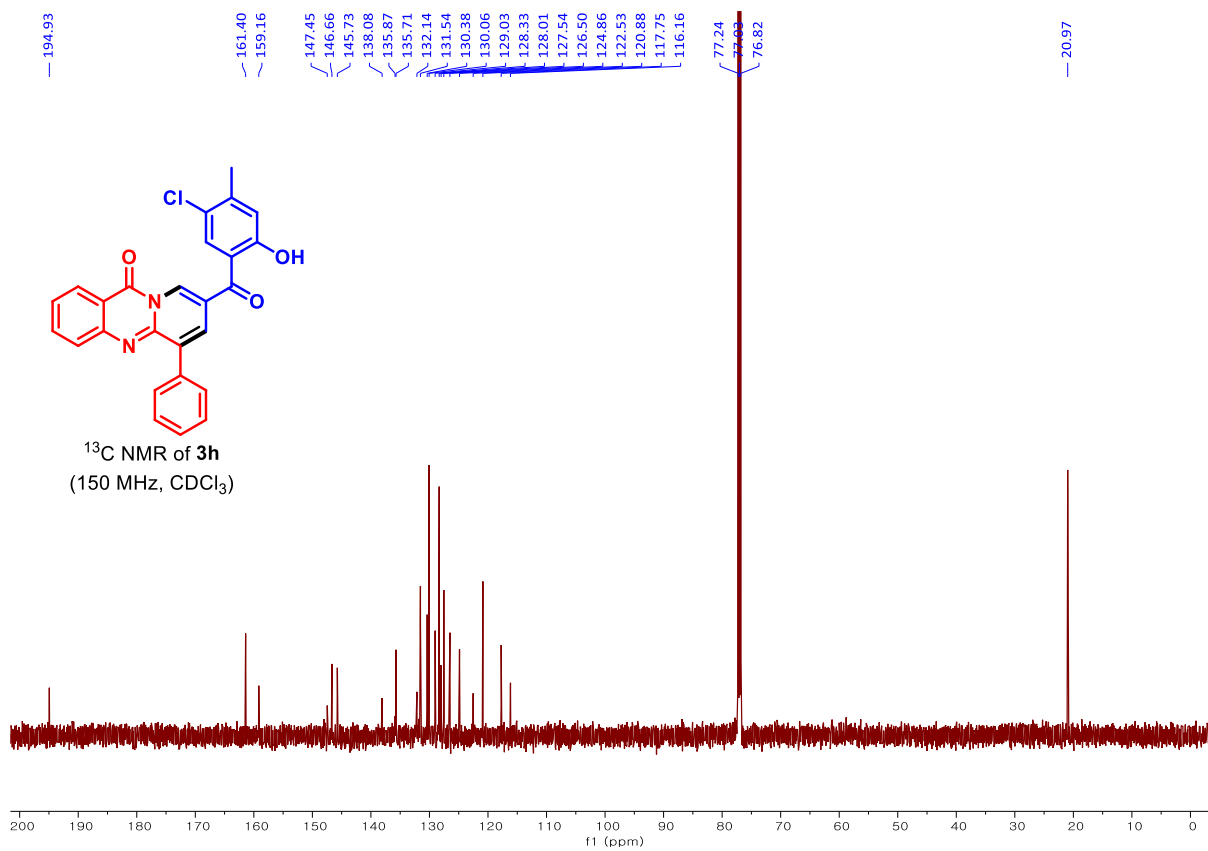

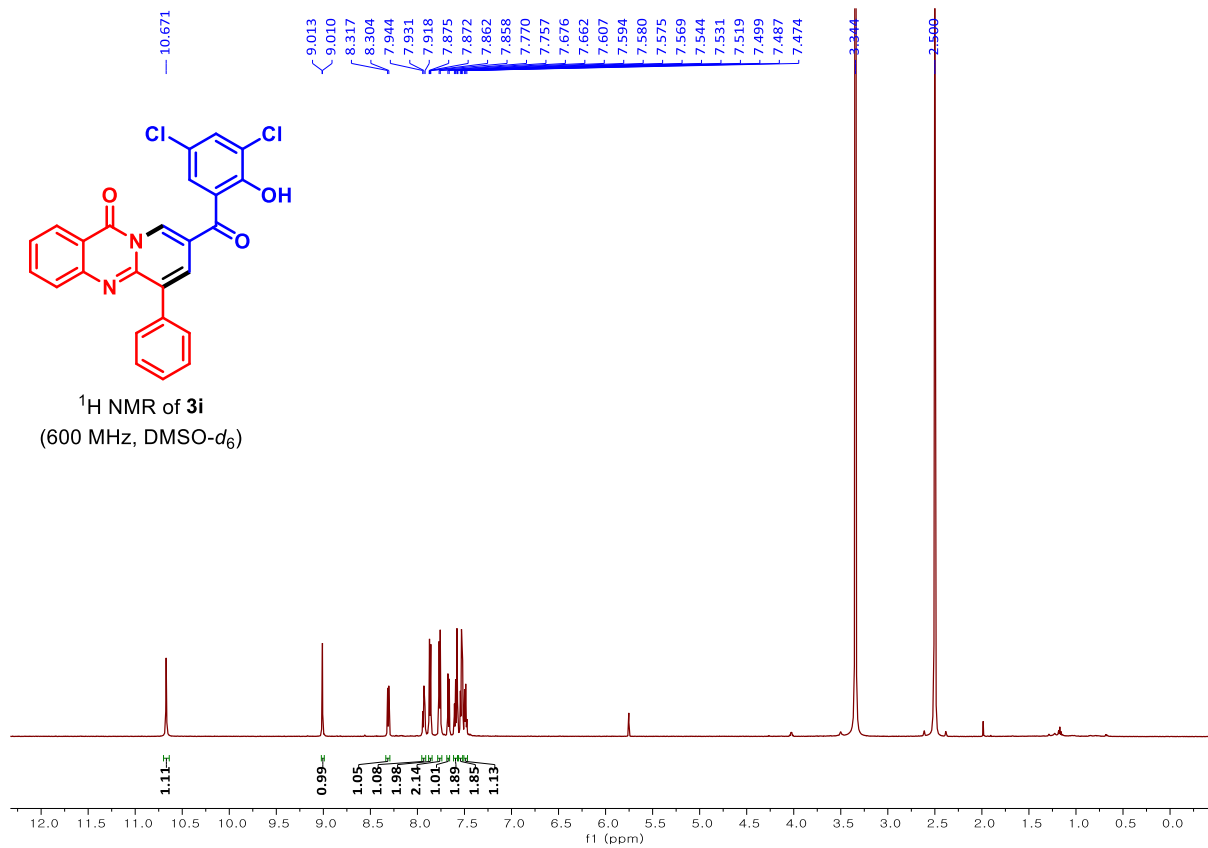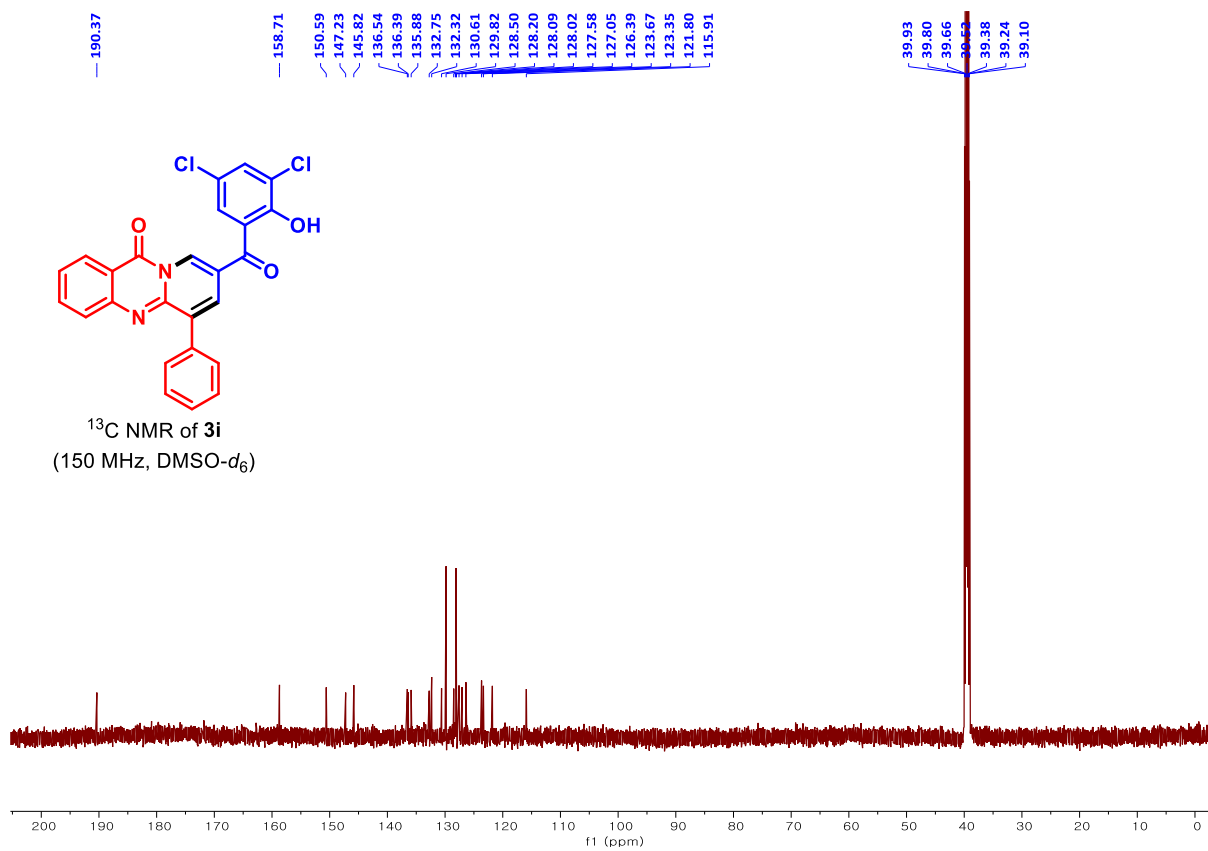

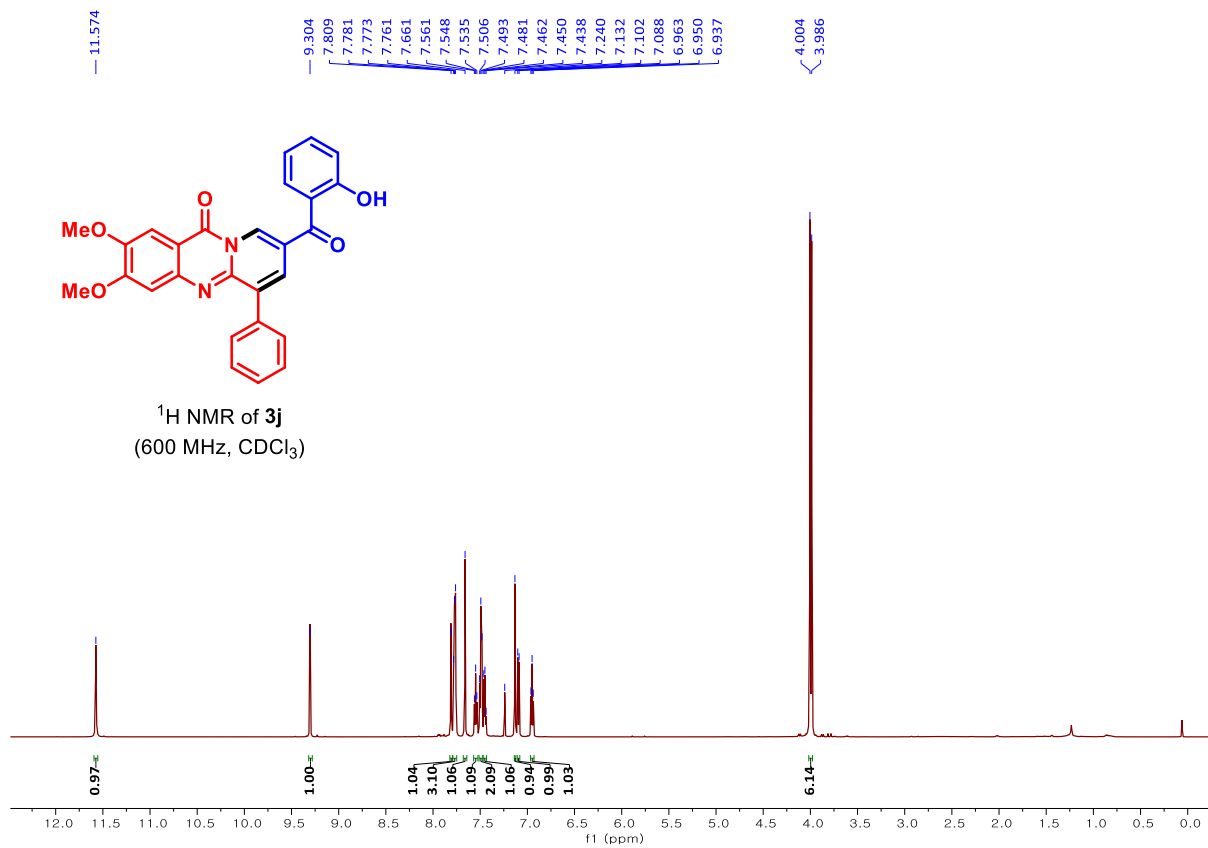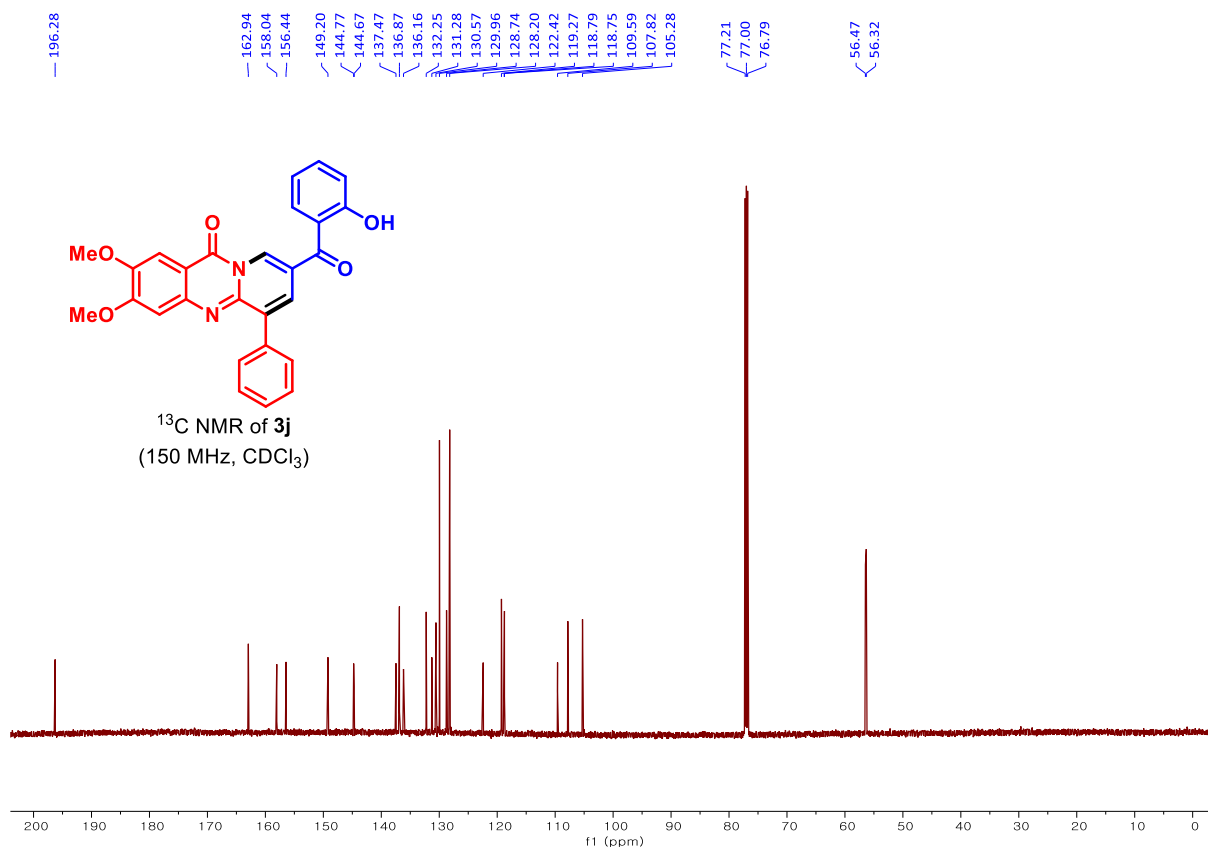

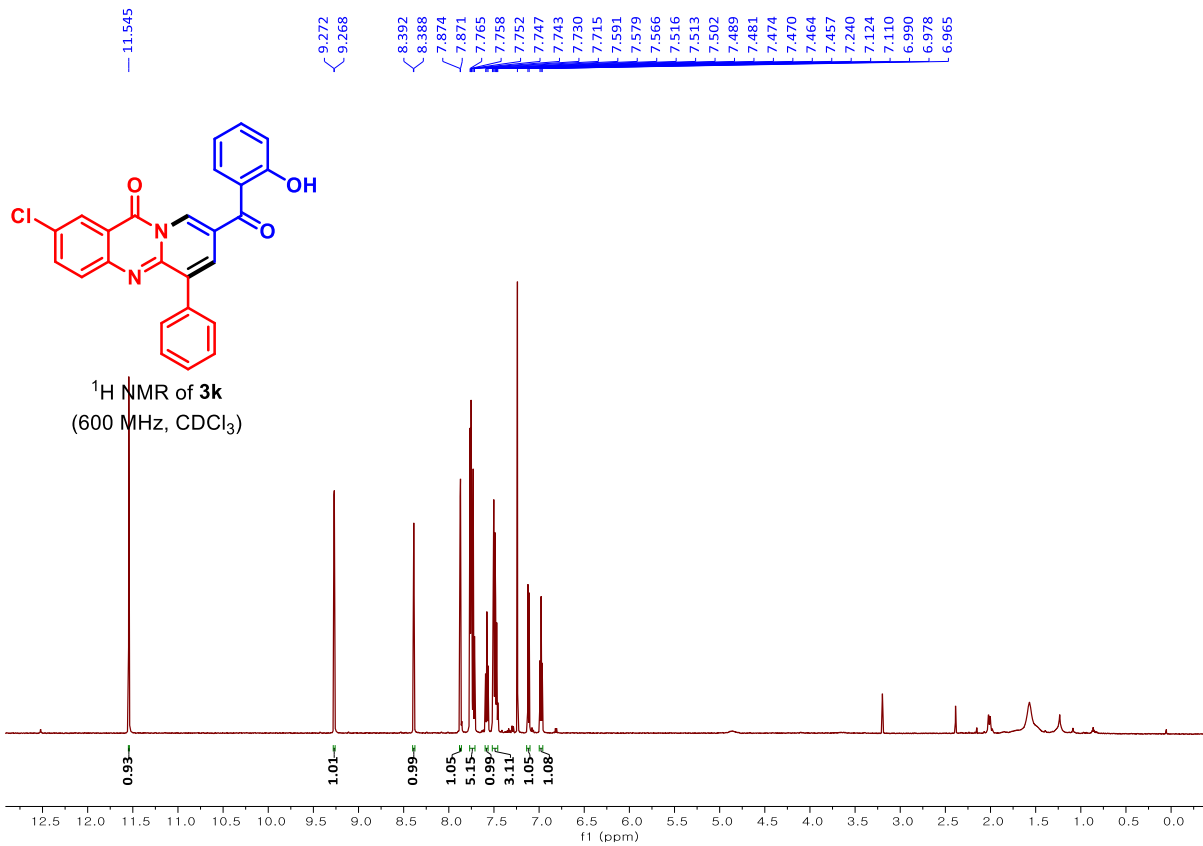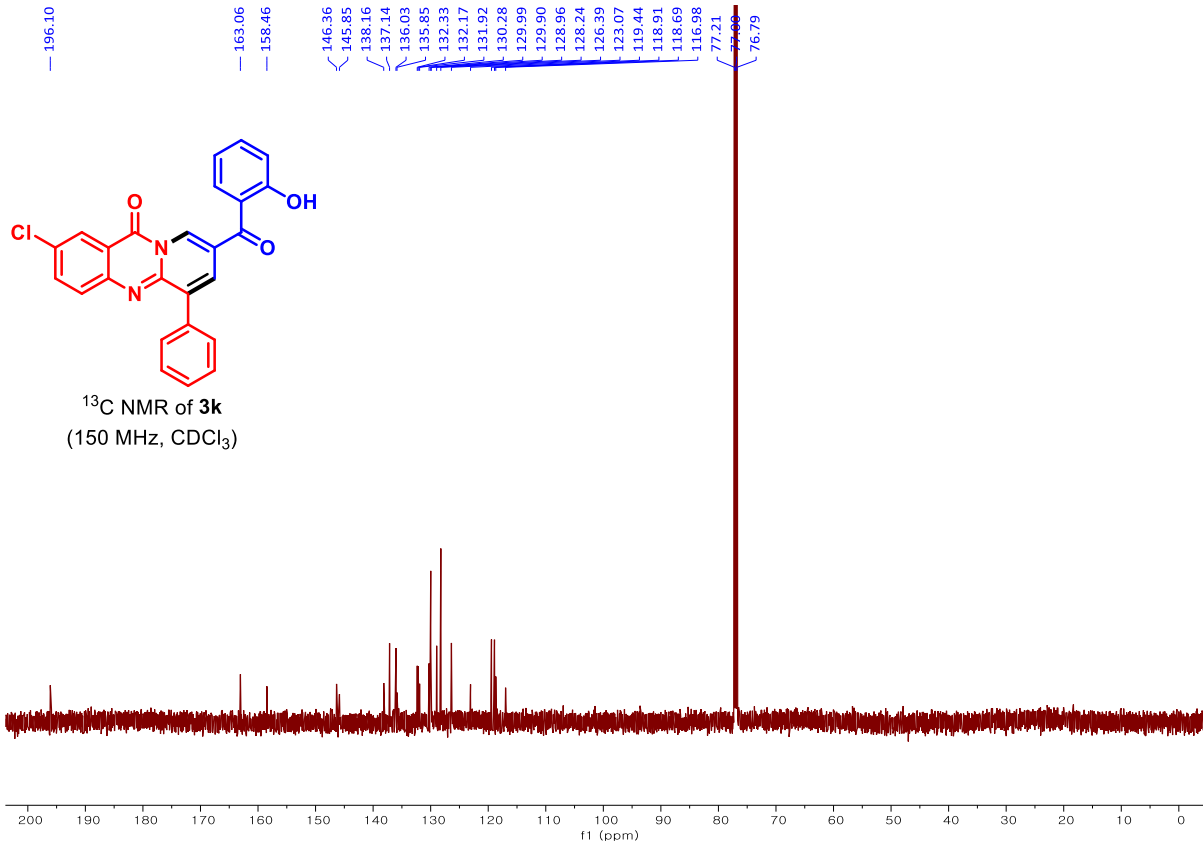

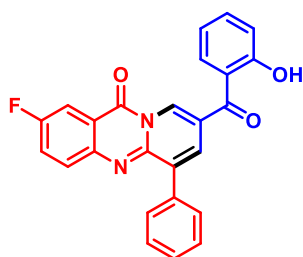

<sup>1</sup>H NMR of **3I**  
(600 MHz, CDCl<sub>3</sub>)

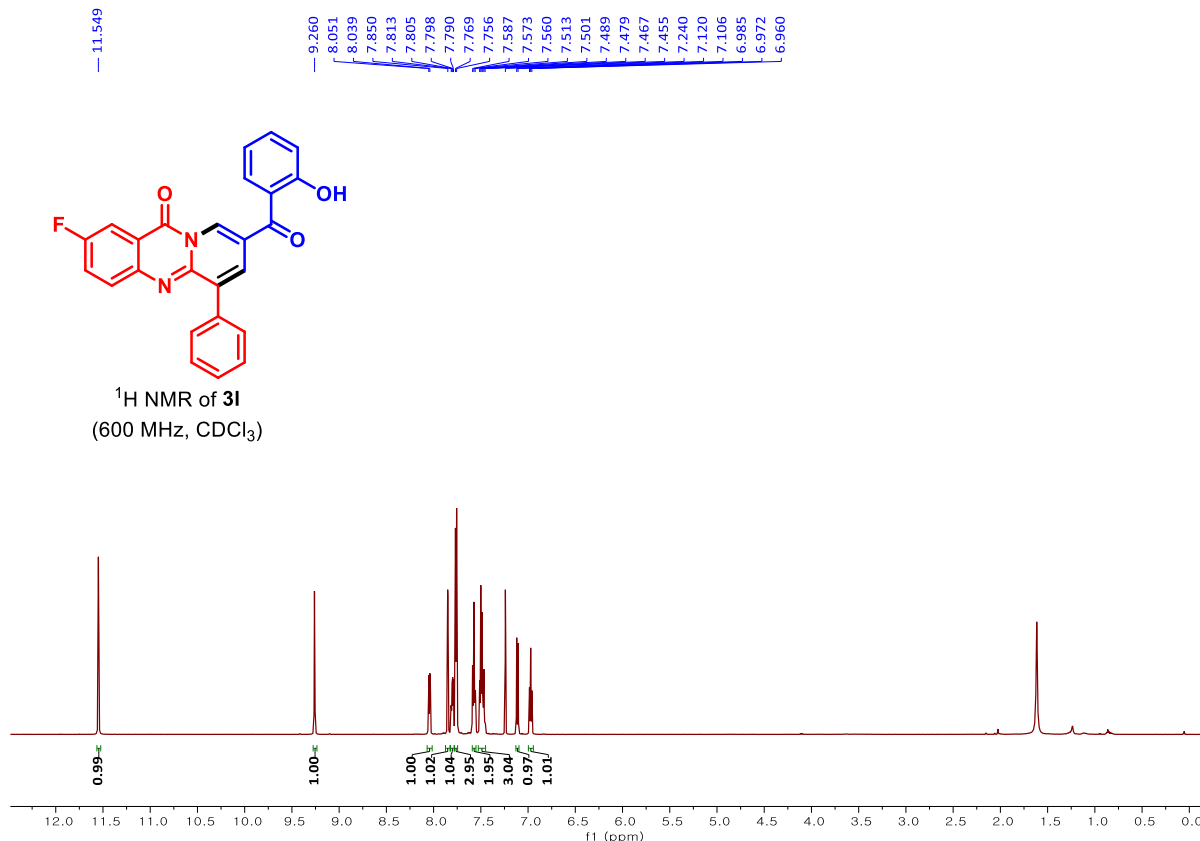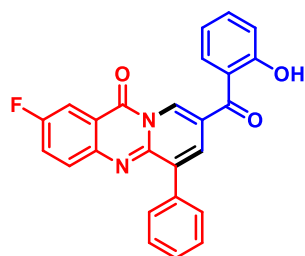

<sup>13</sup>C NMR of **3I**  
(150 MHz, CDCl<sub>3</sub>)

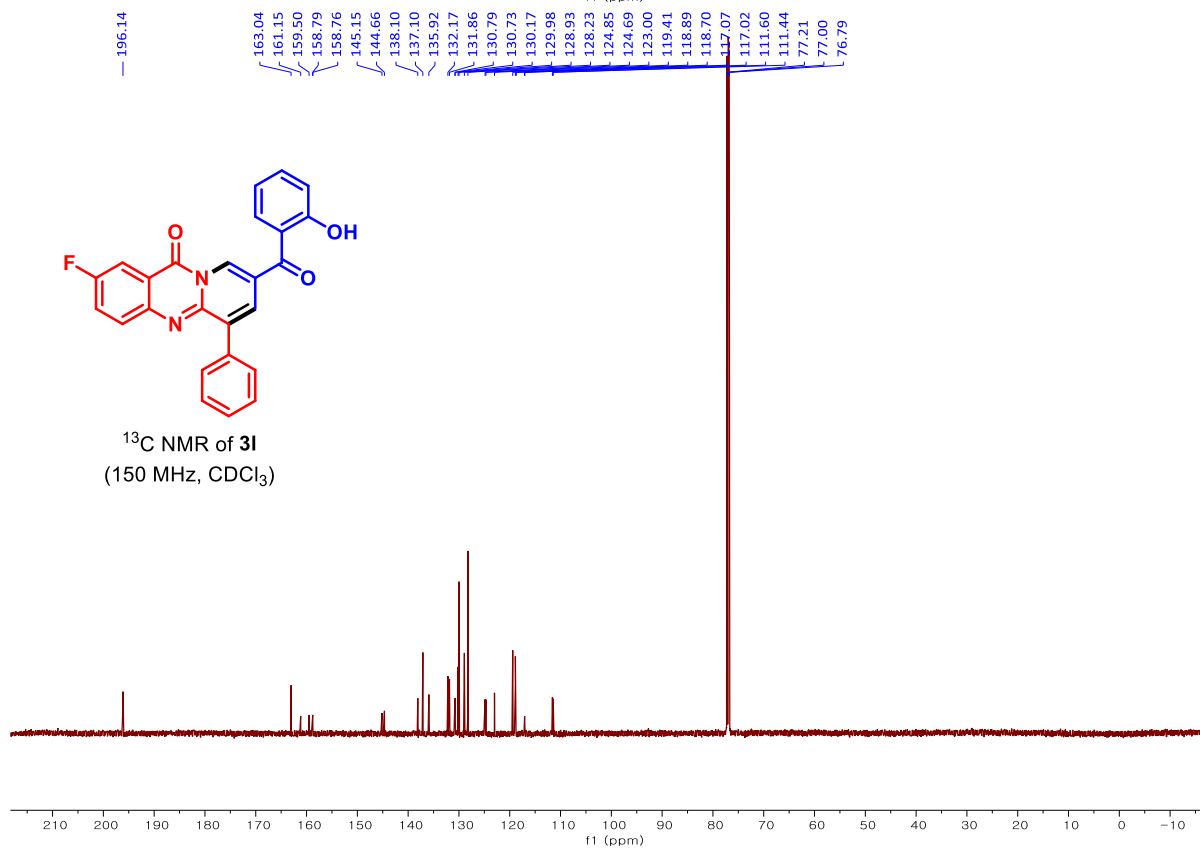

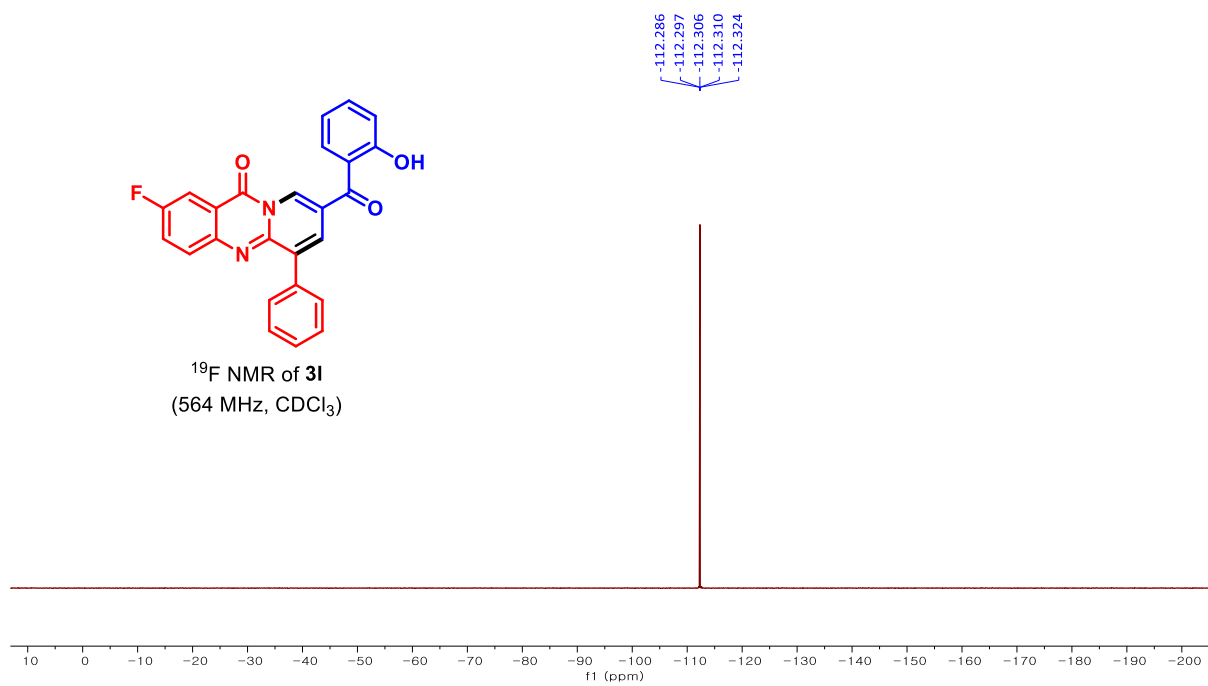

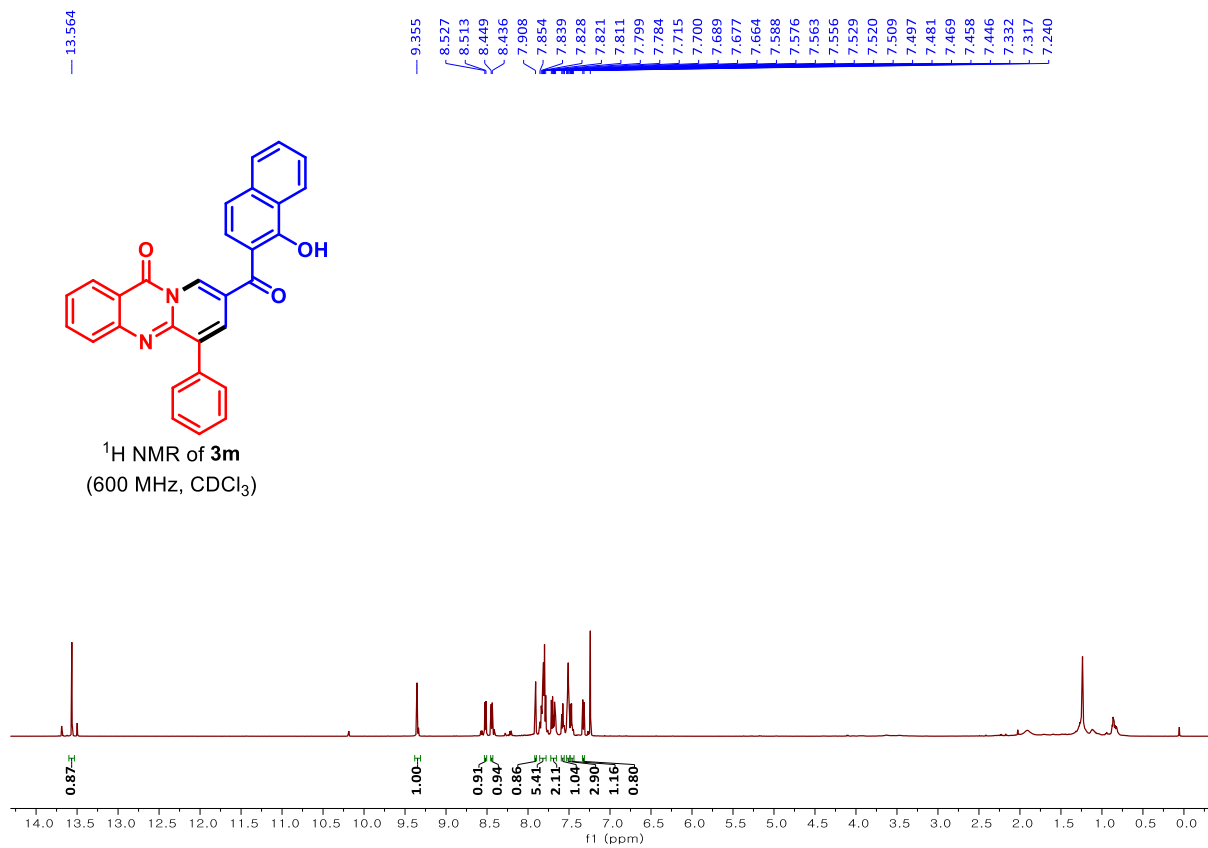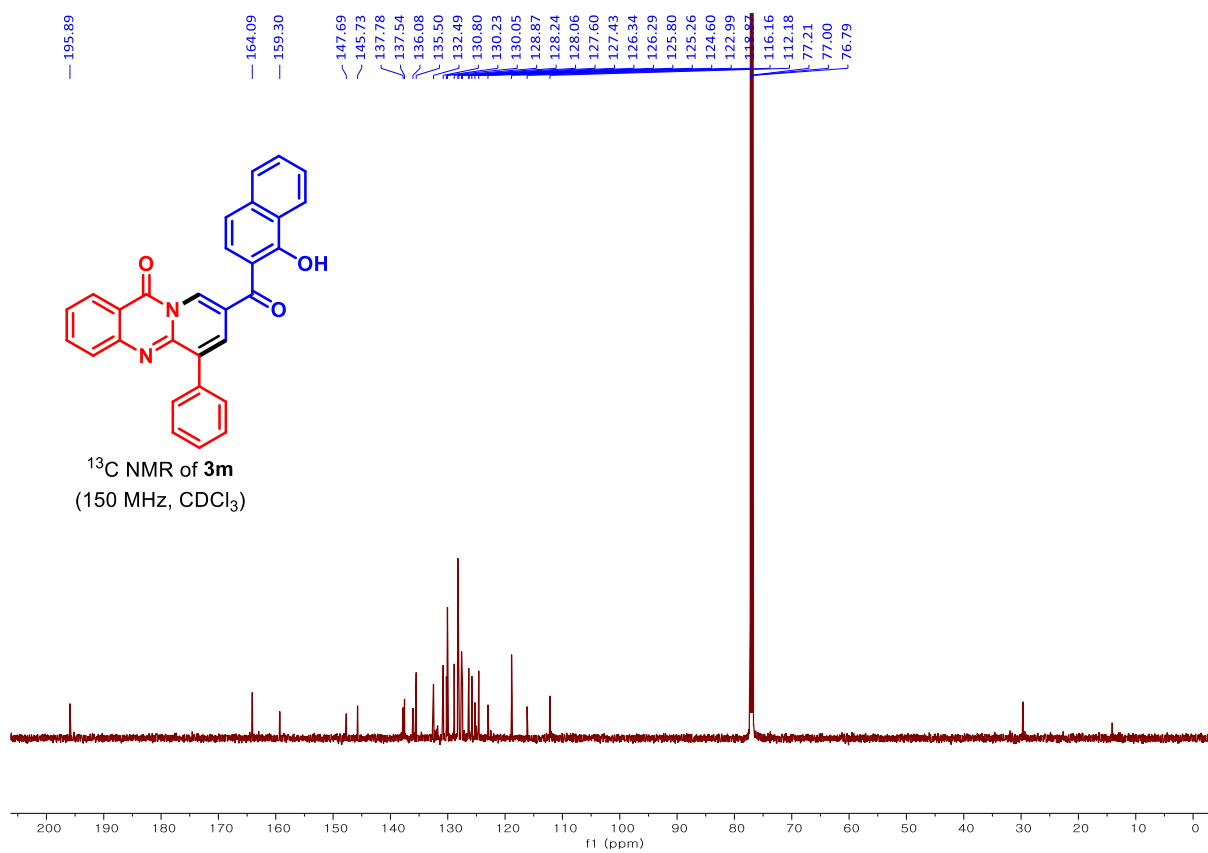



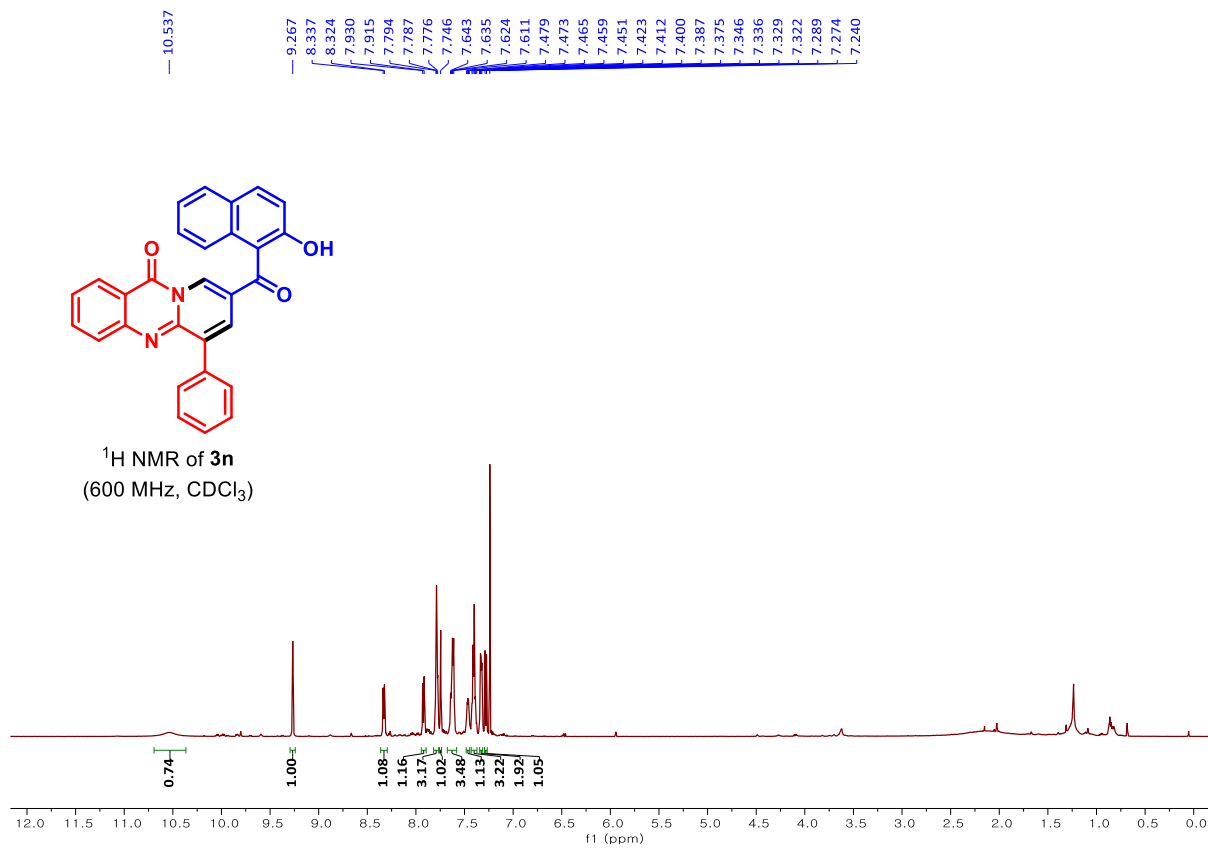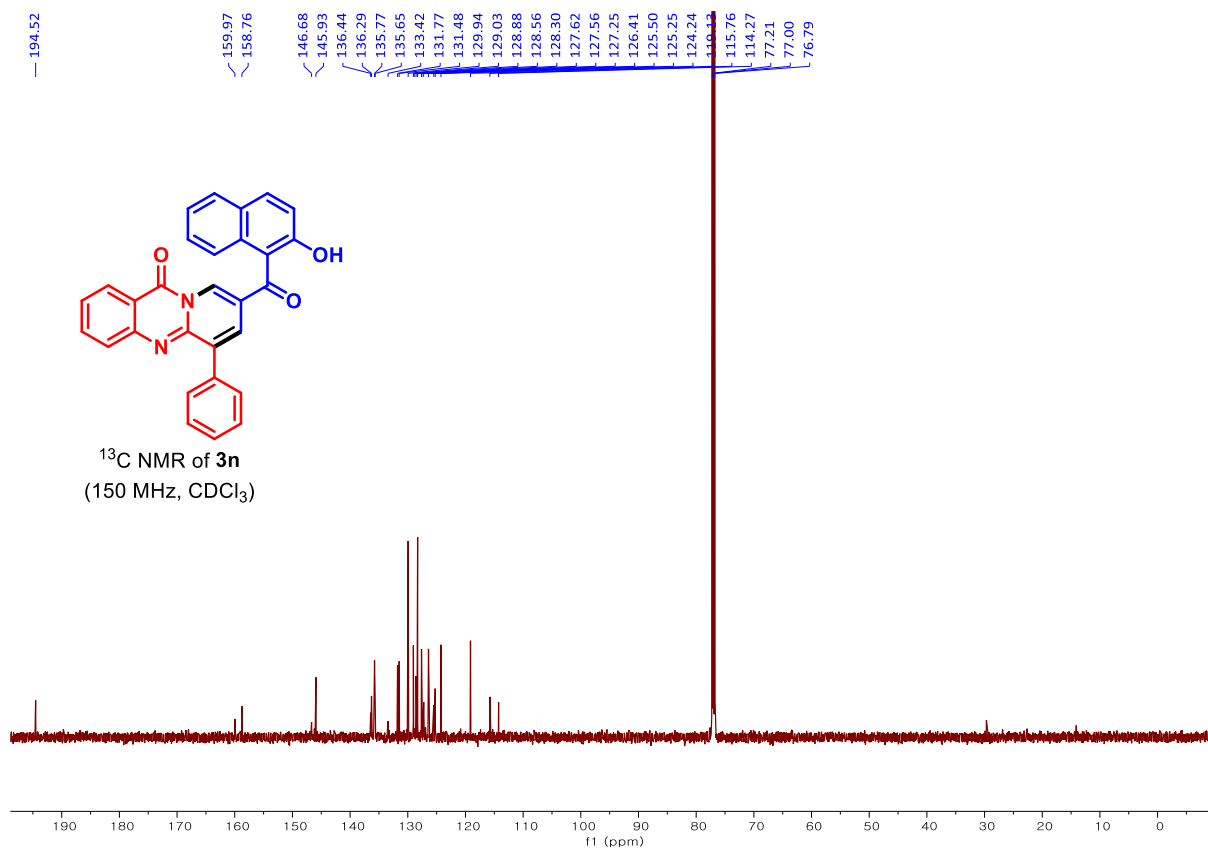

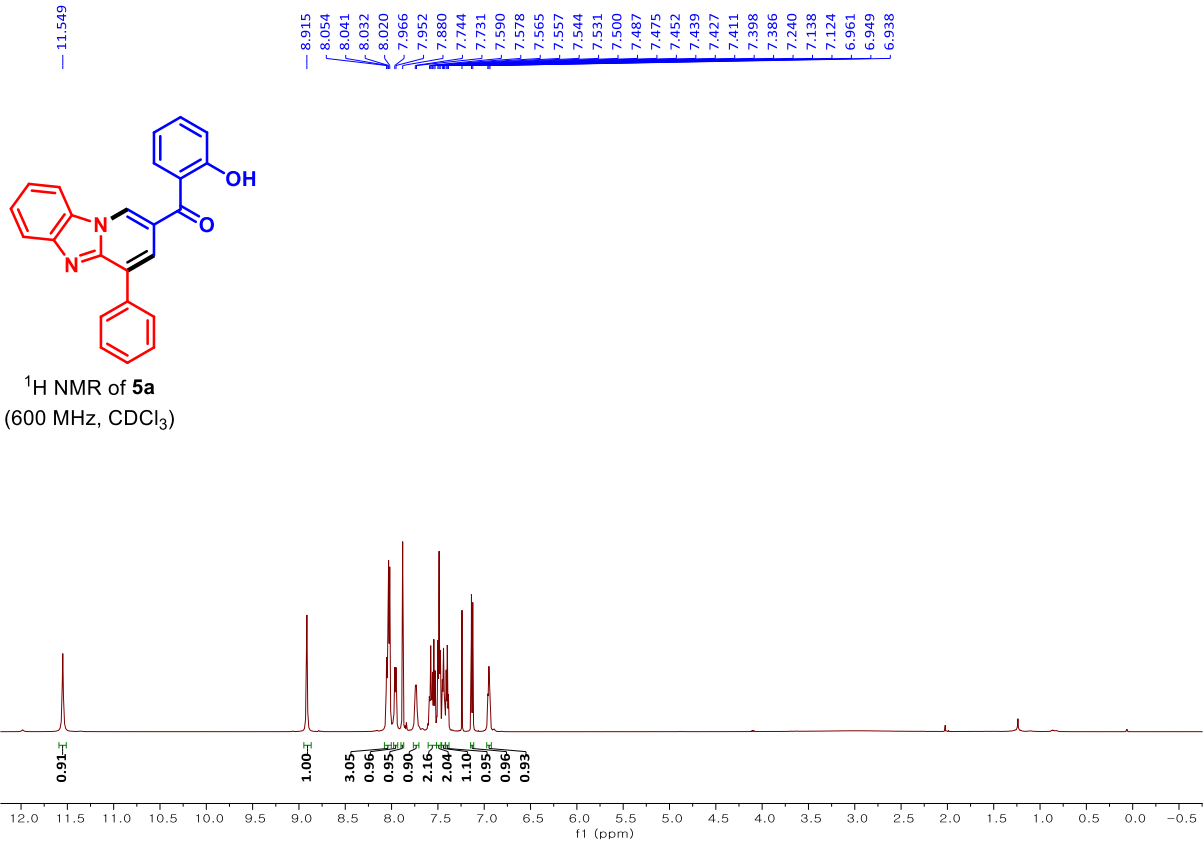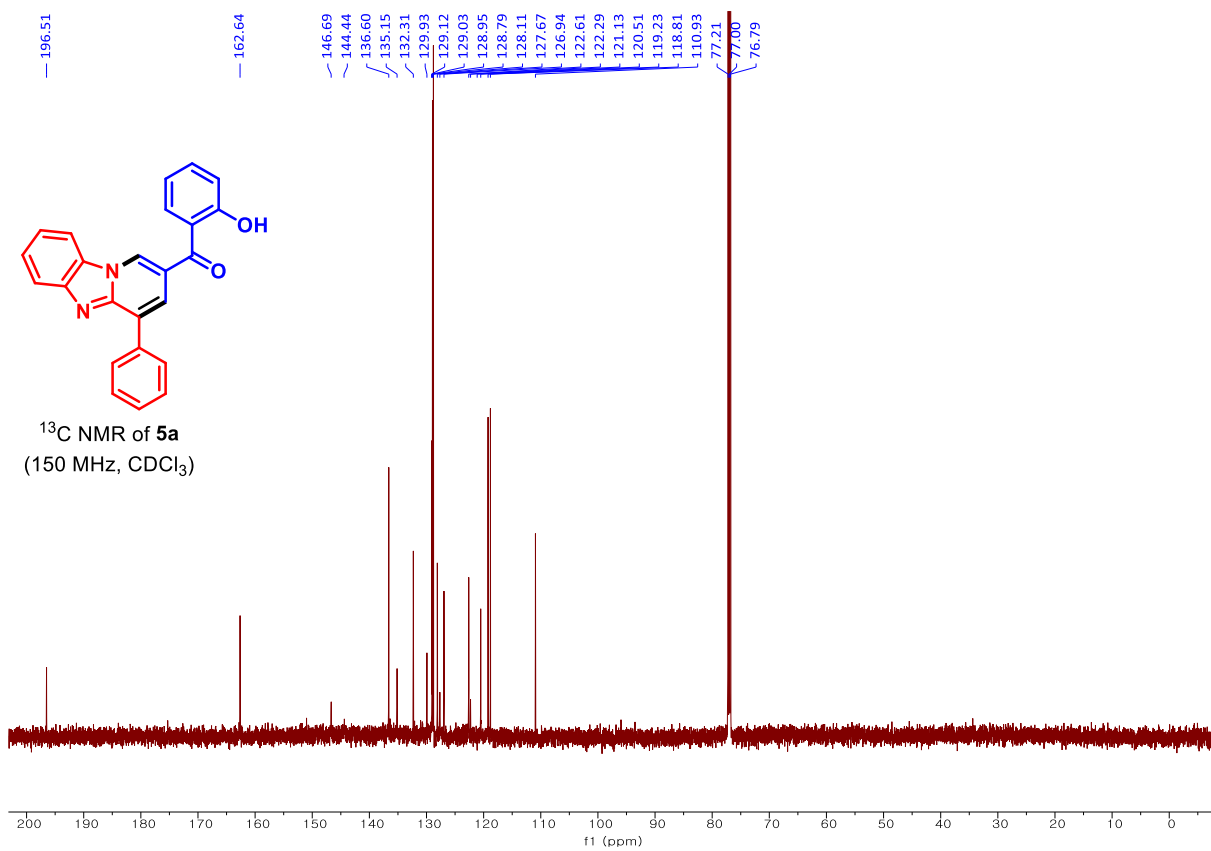

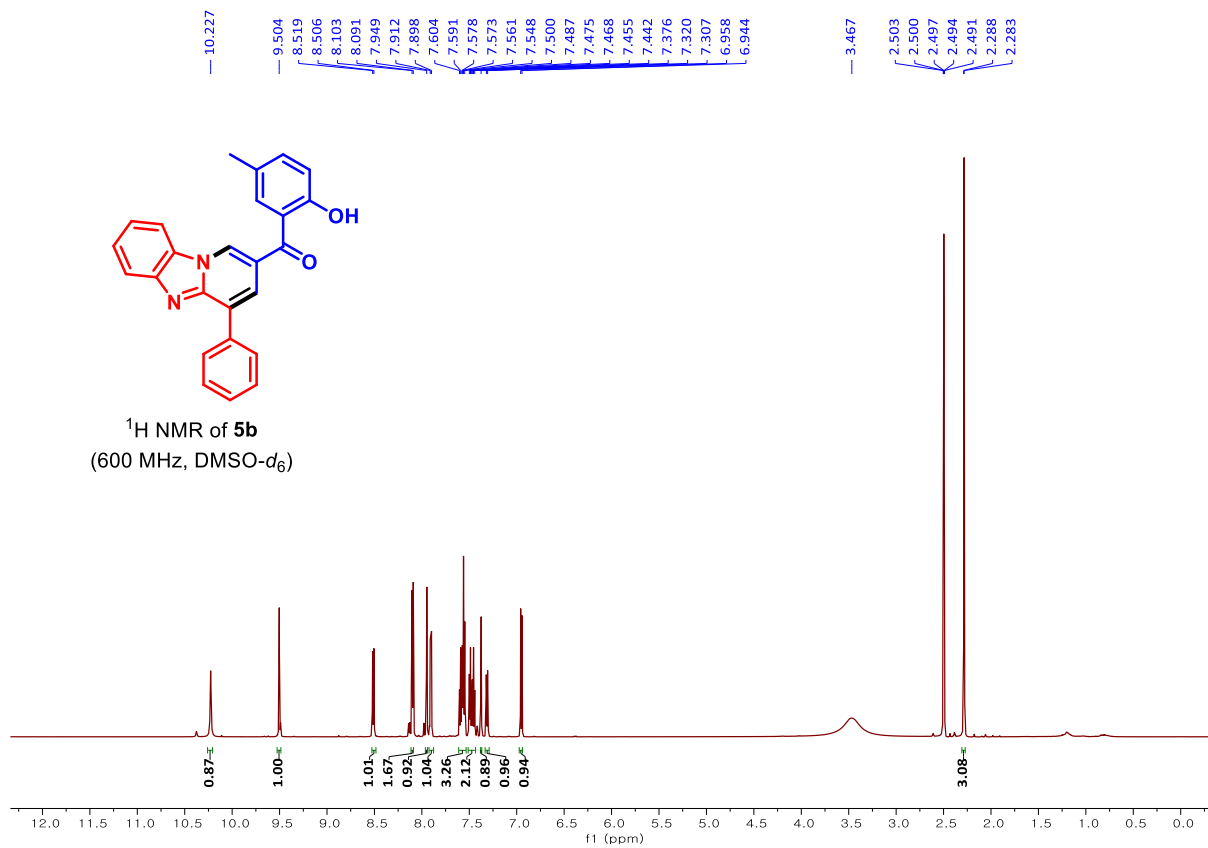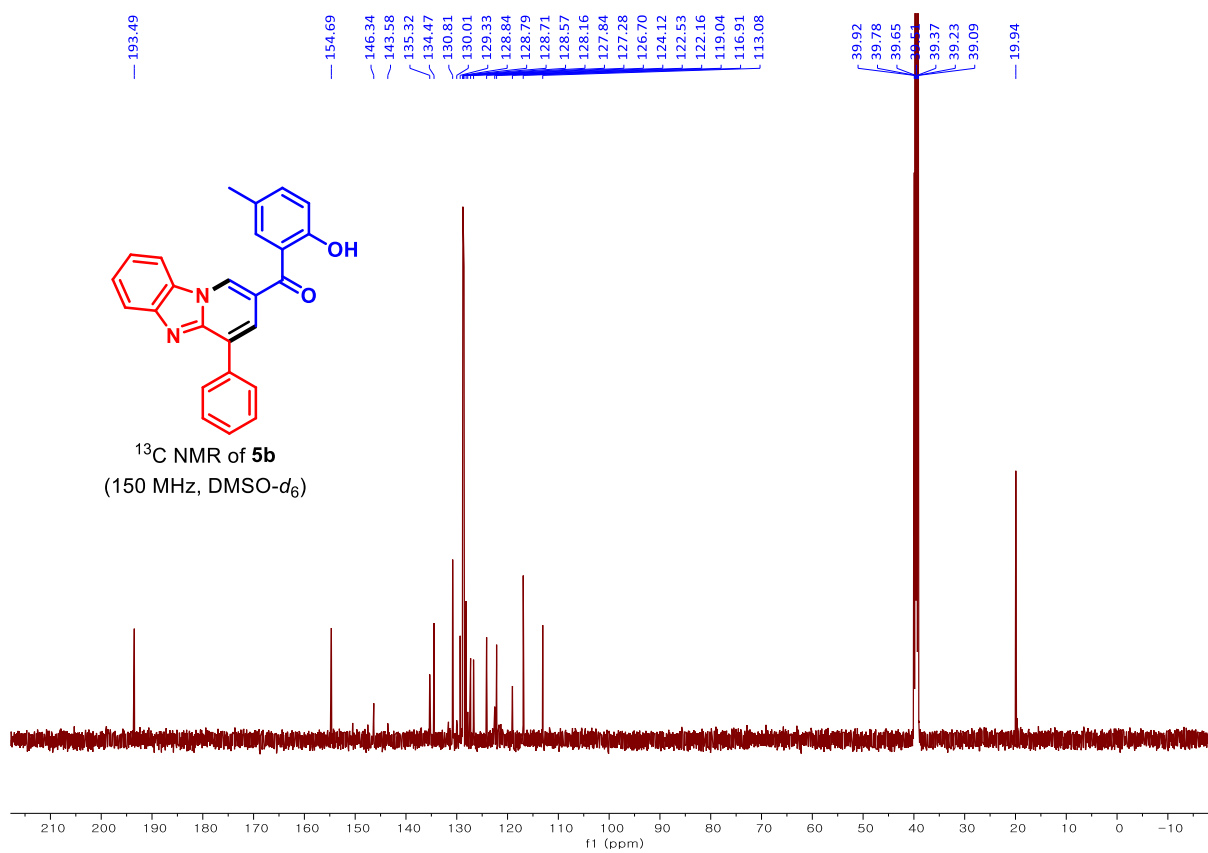

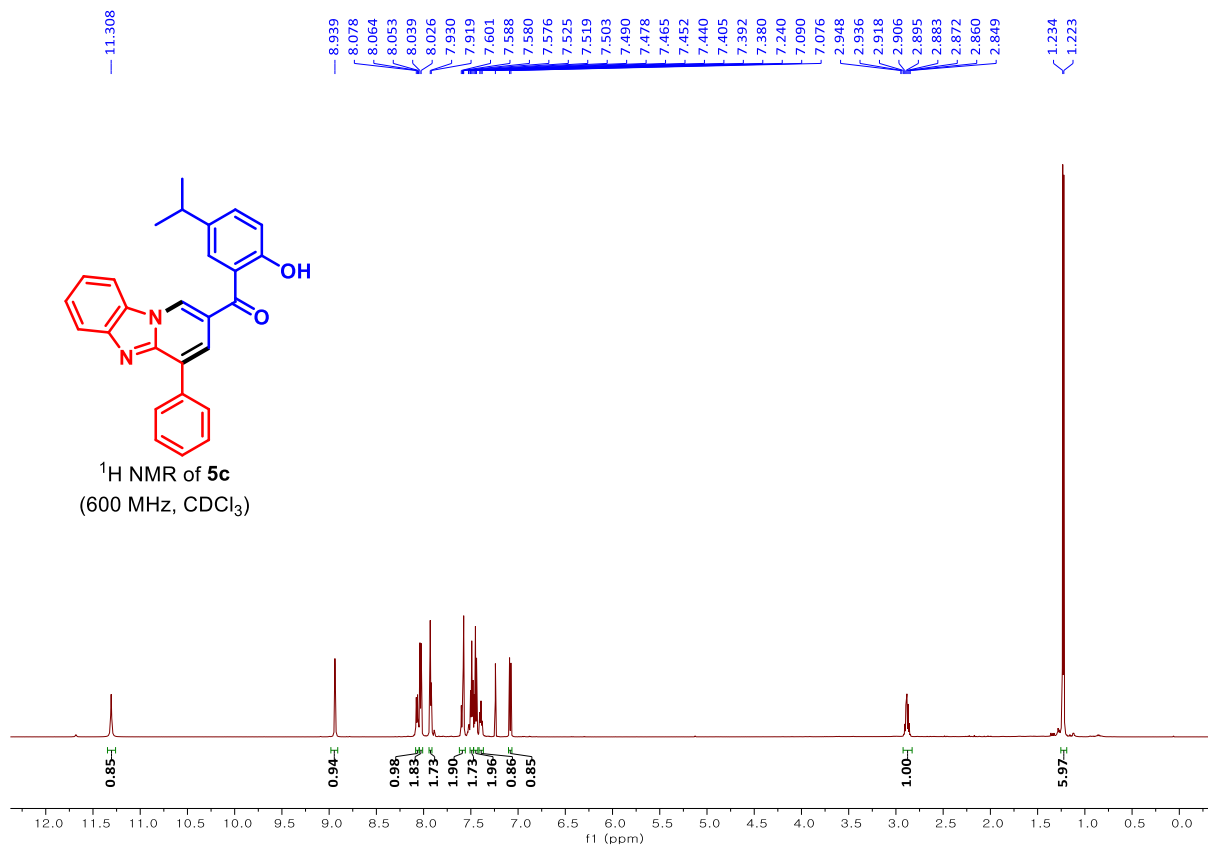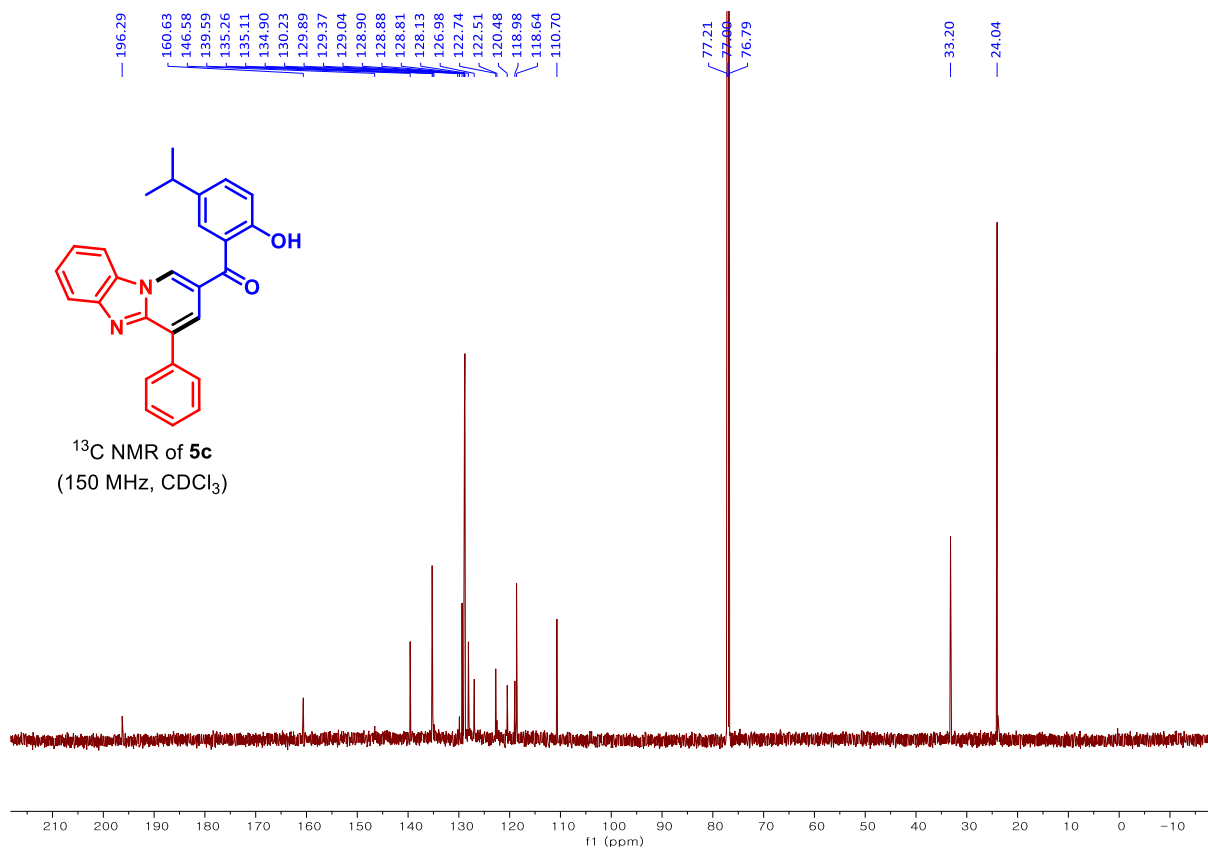

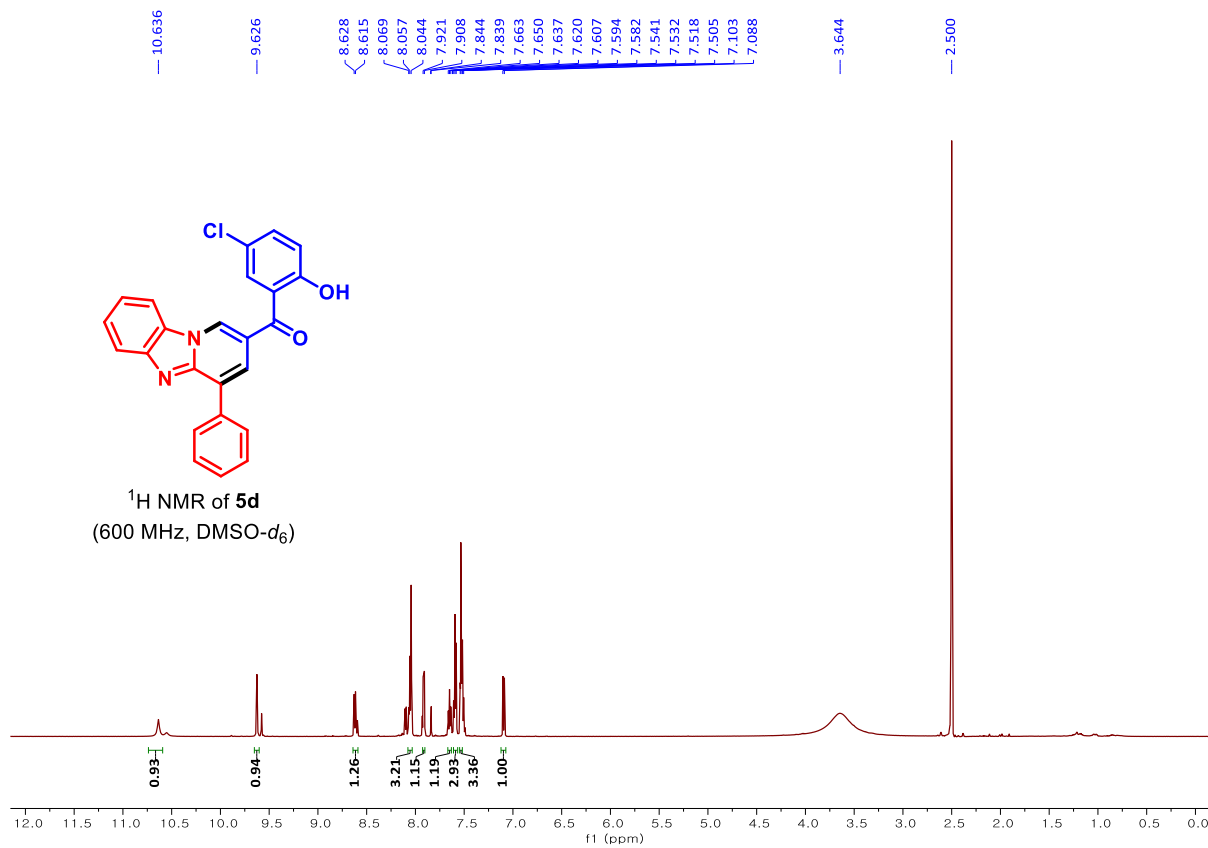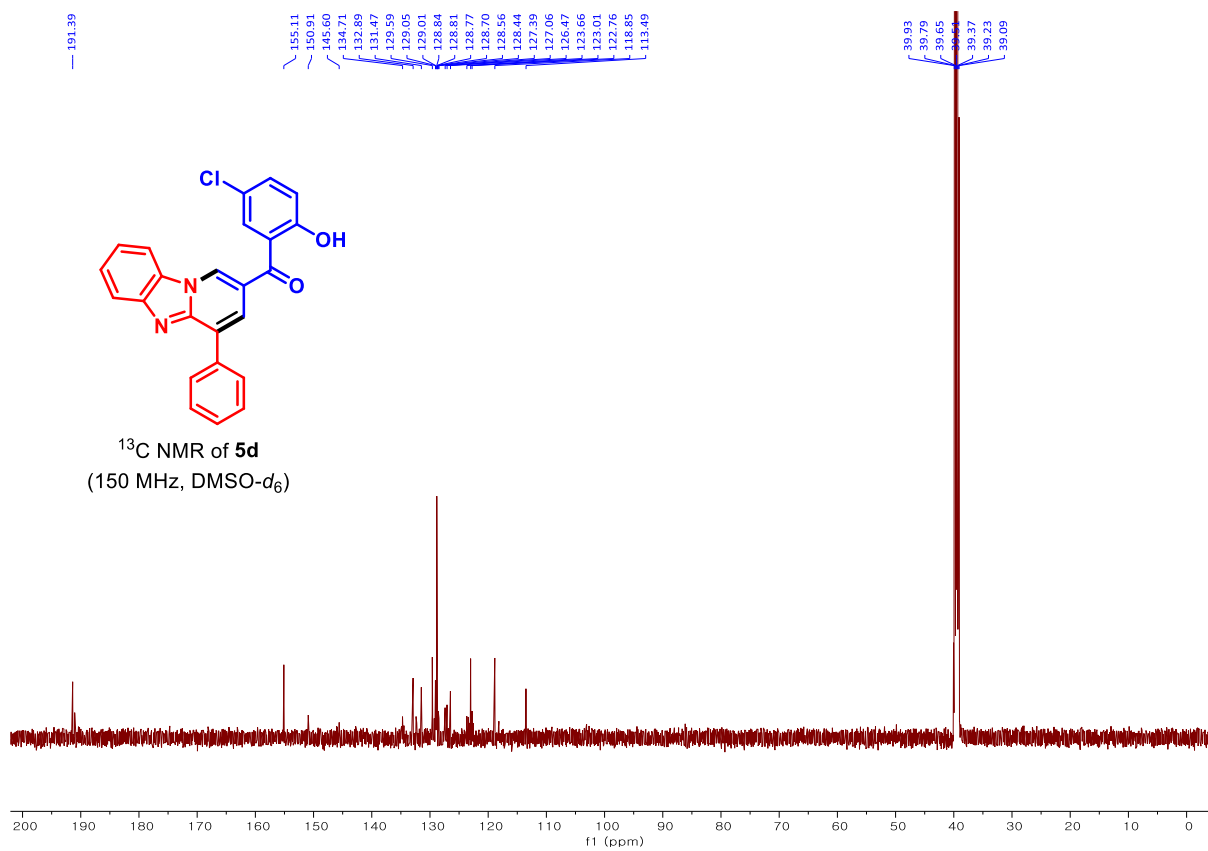

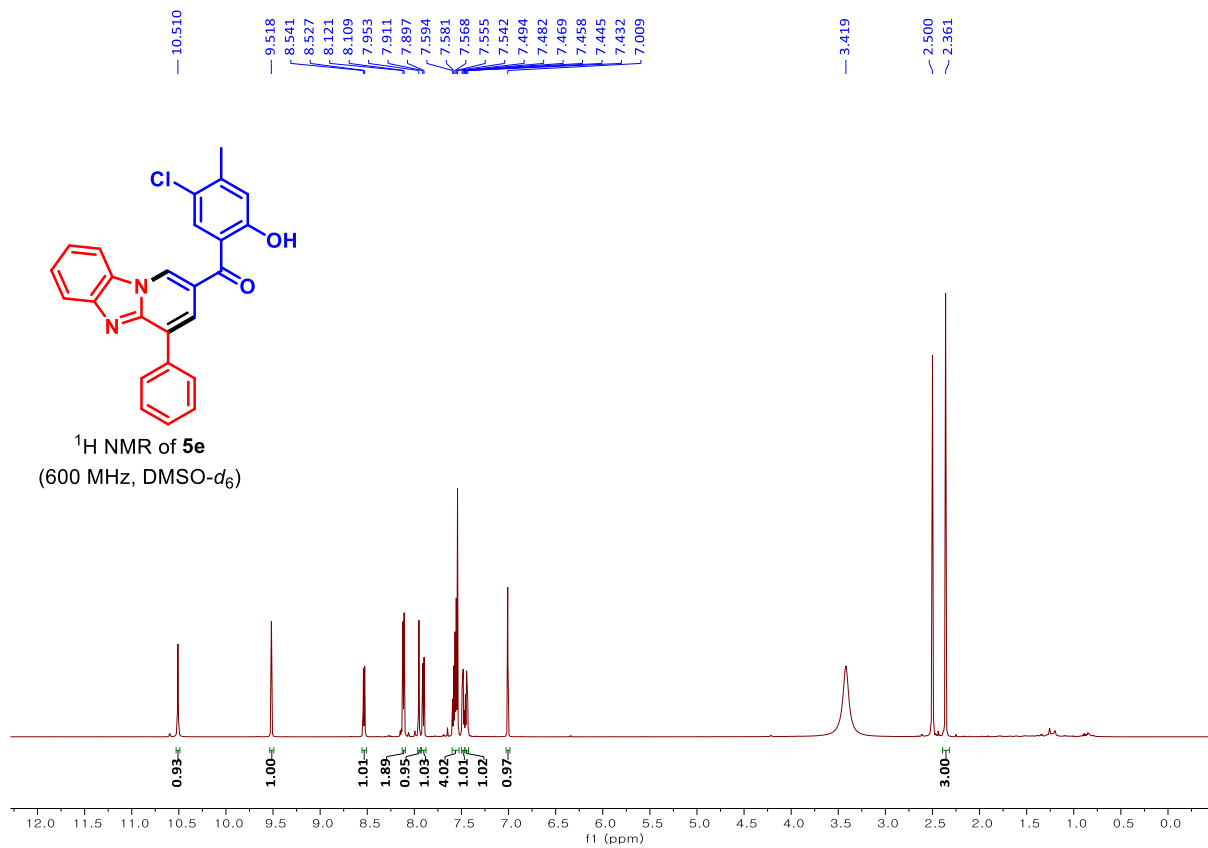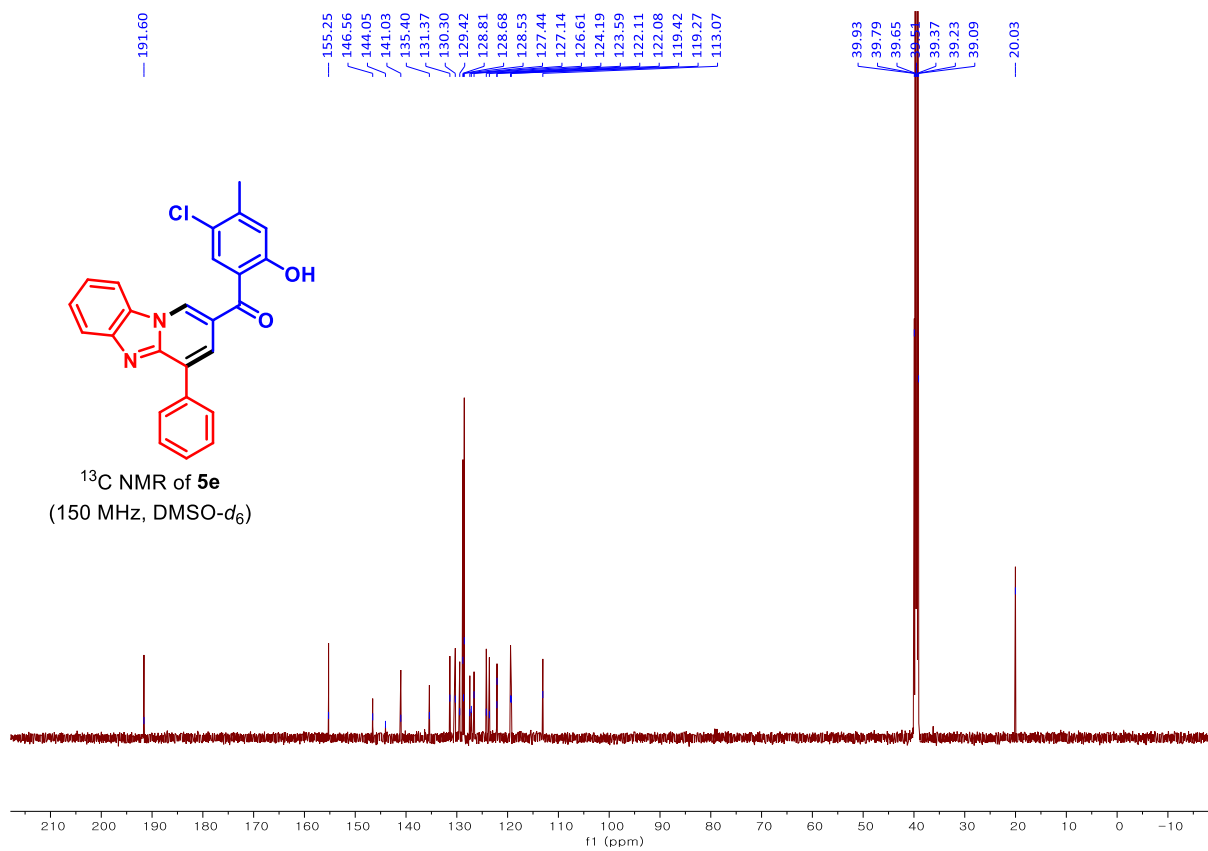

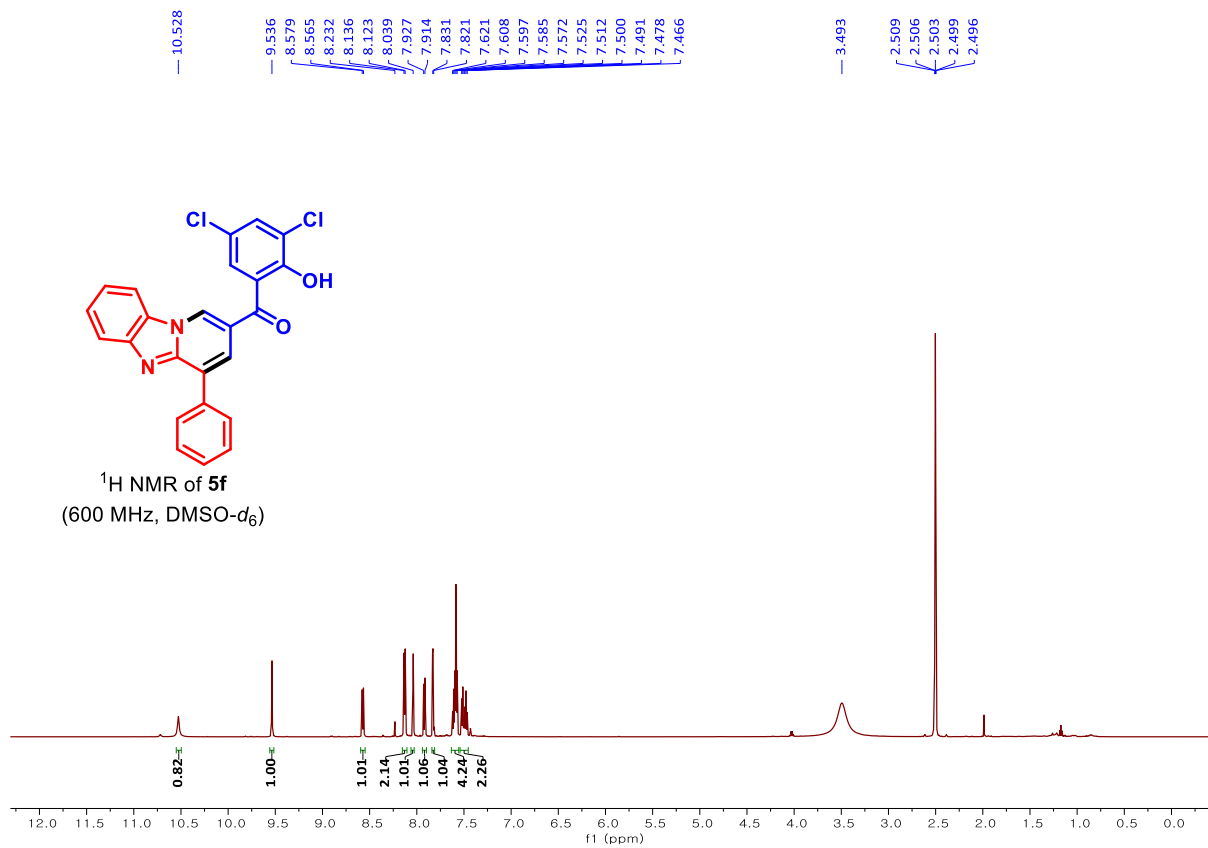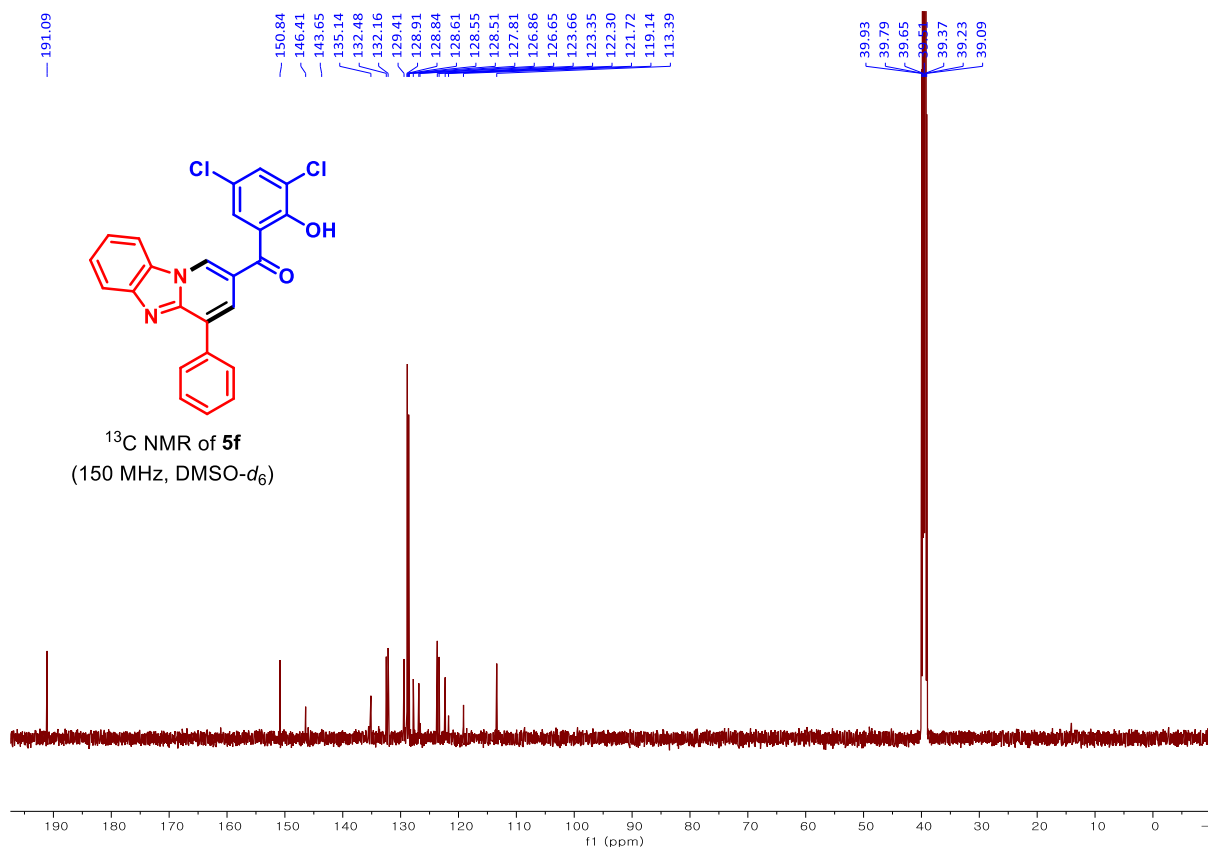

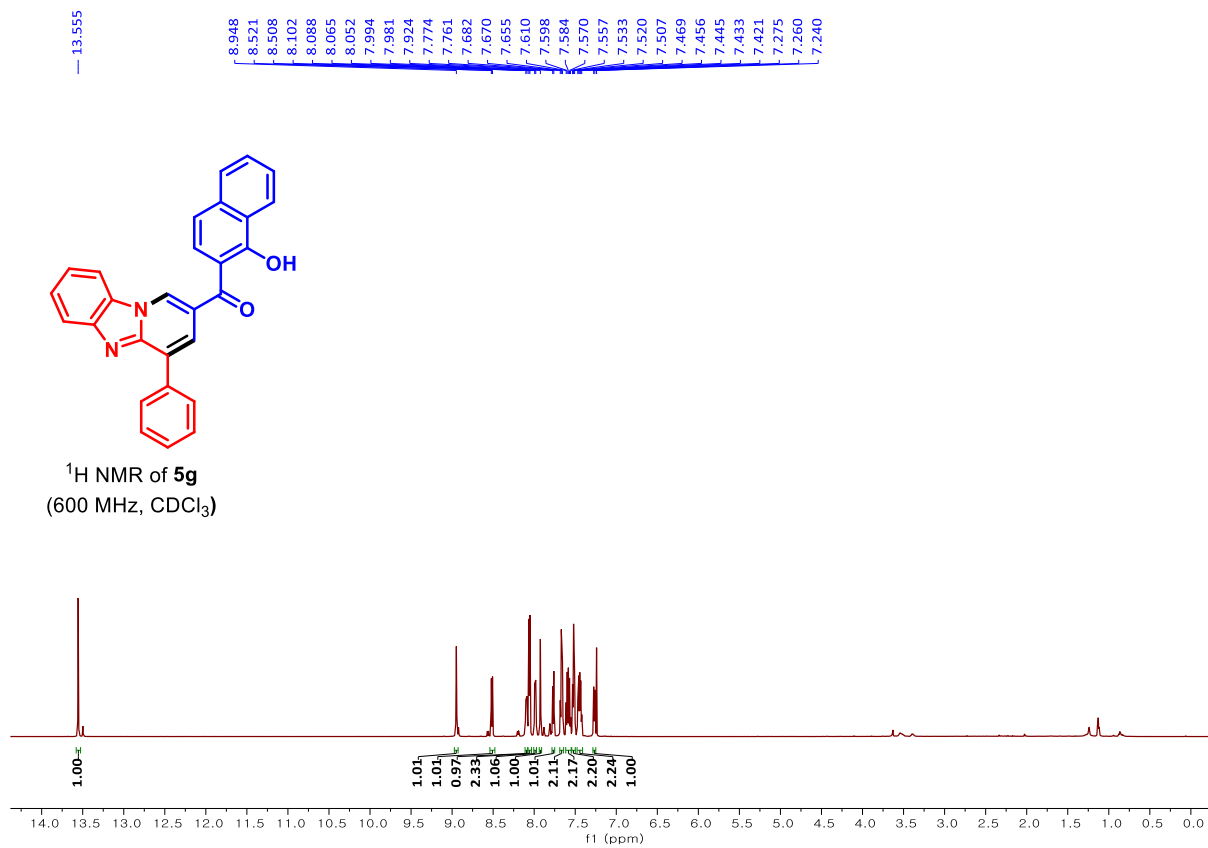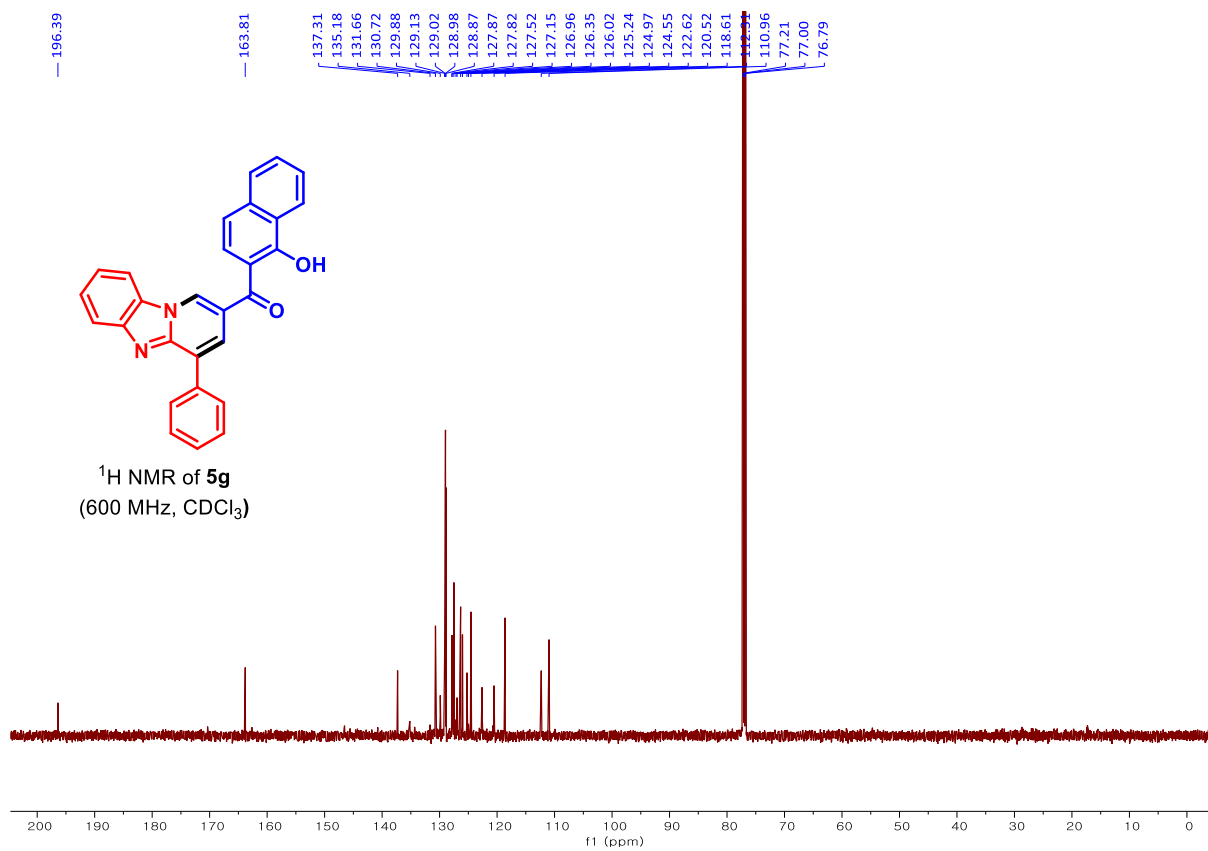



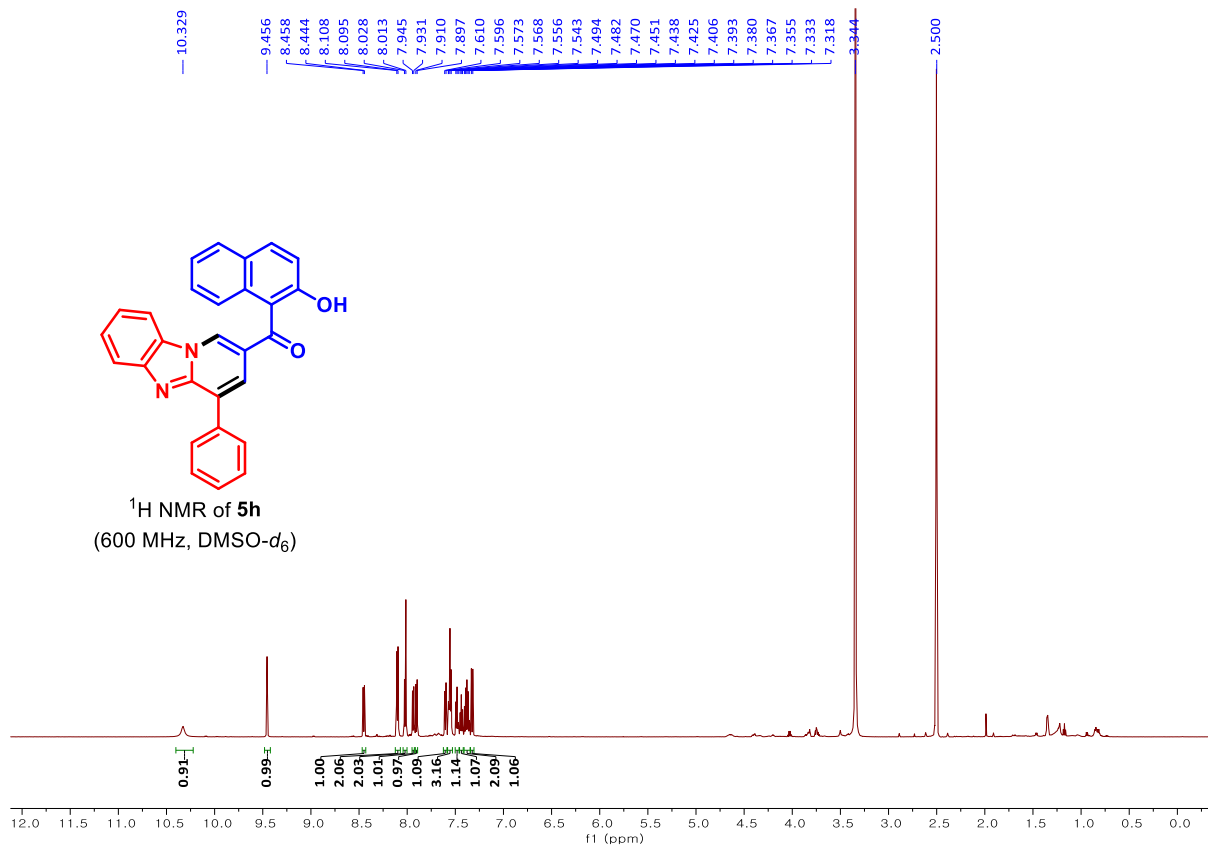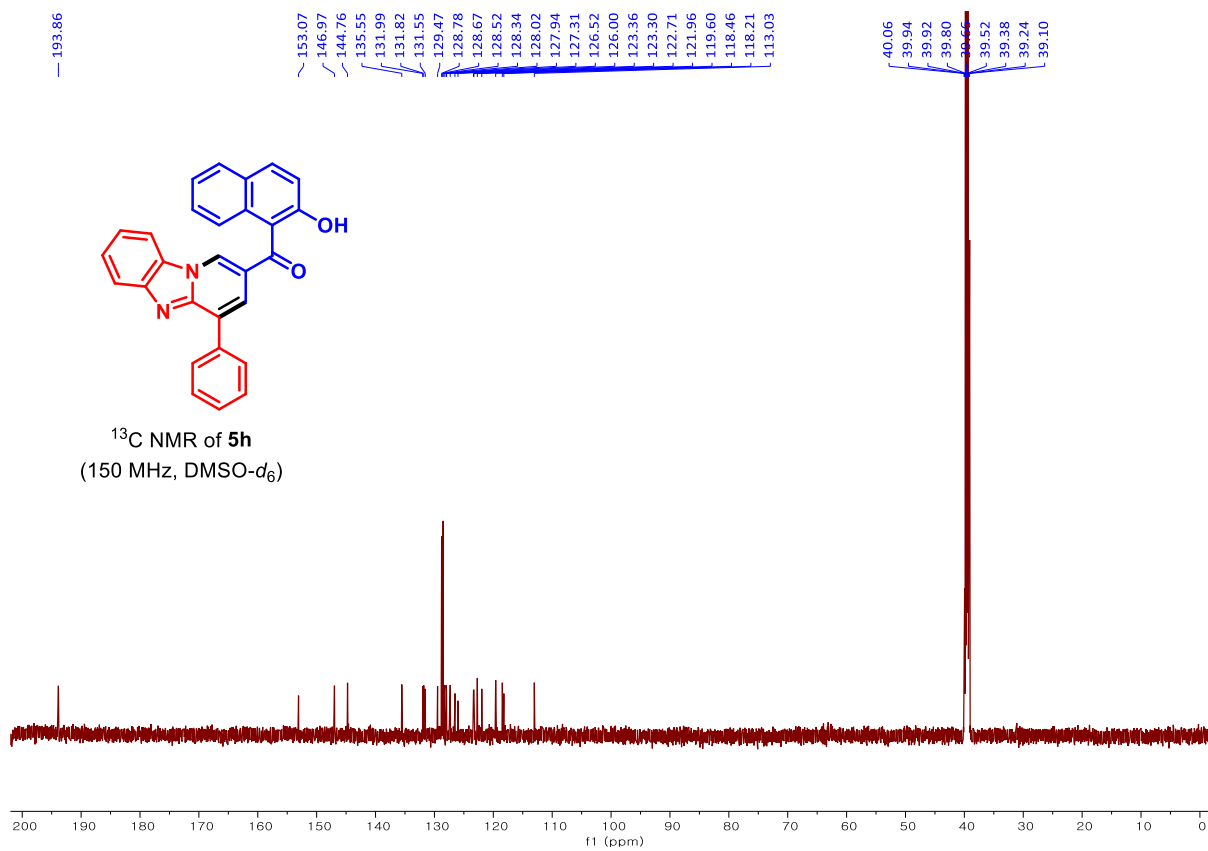

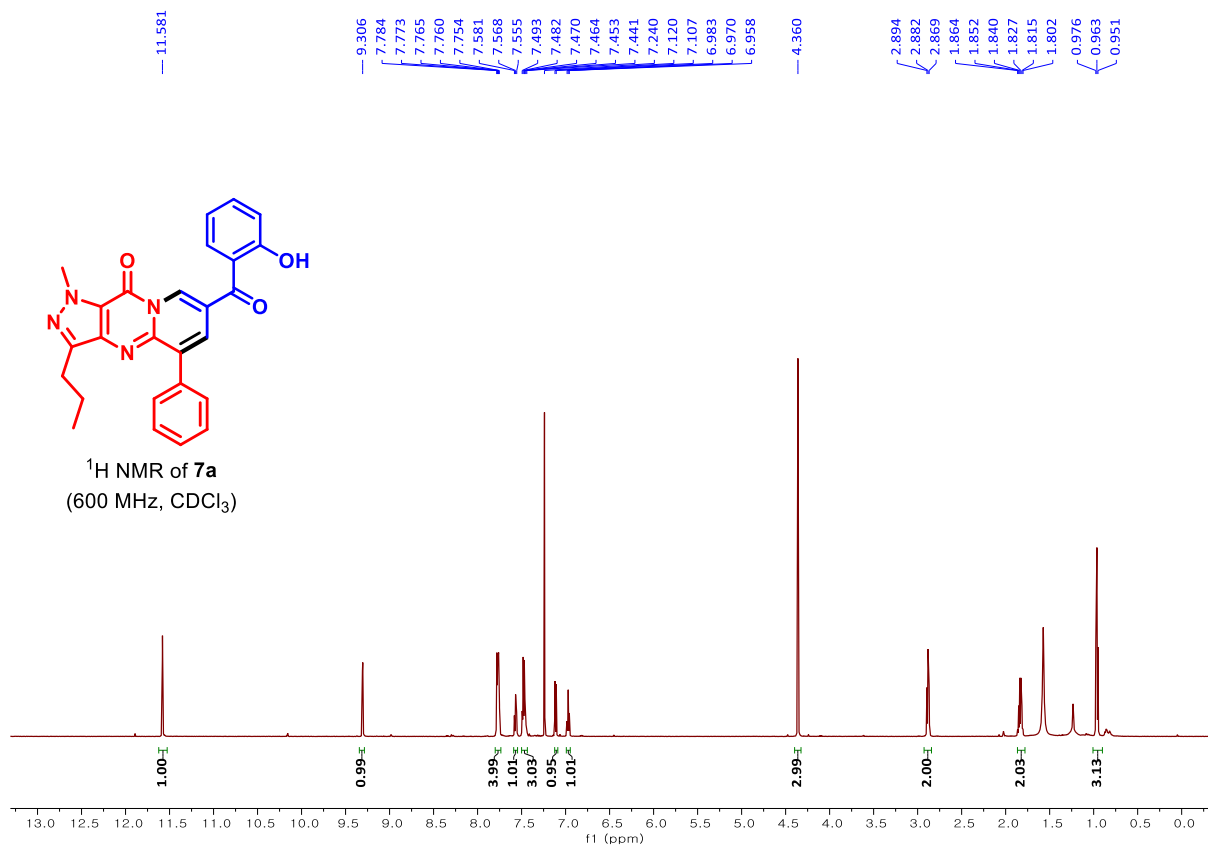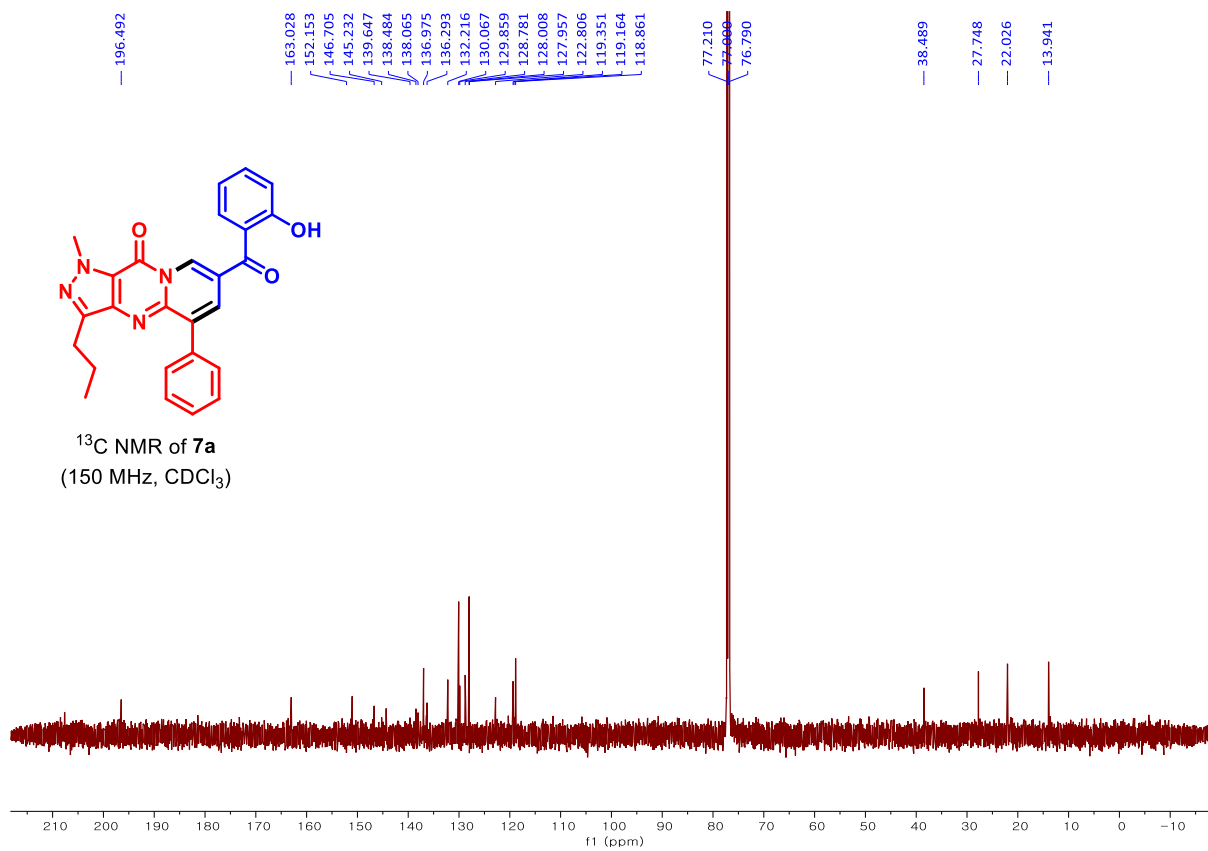

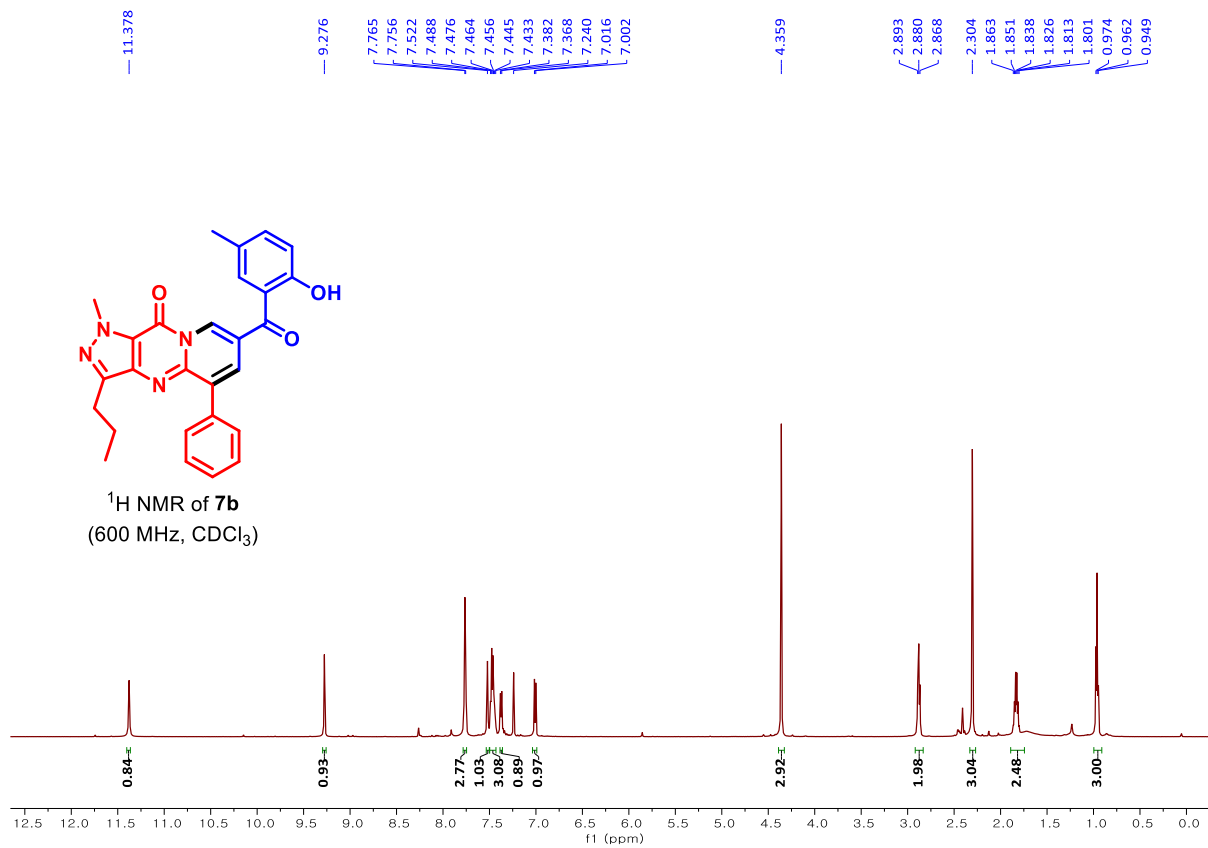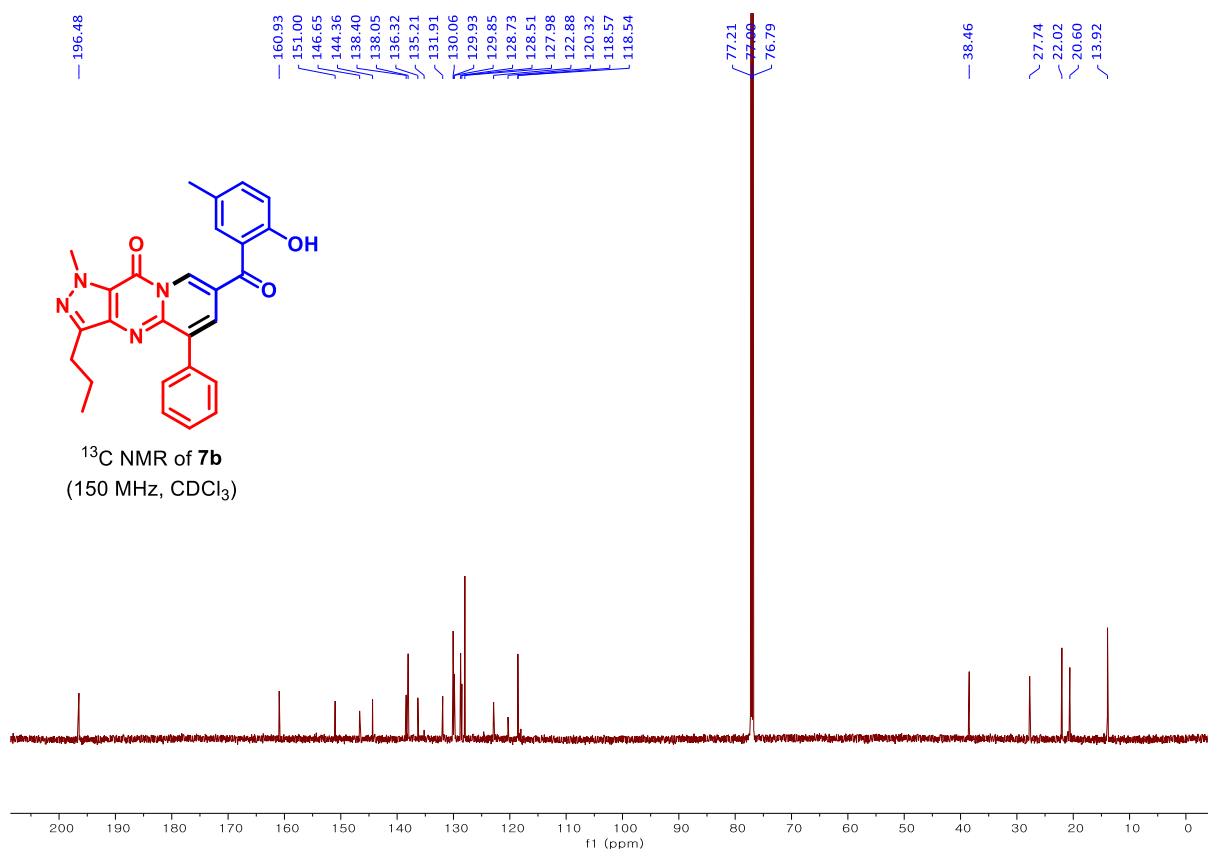

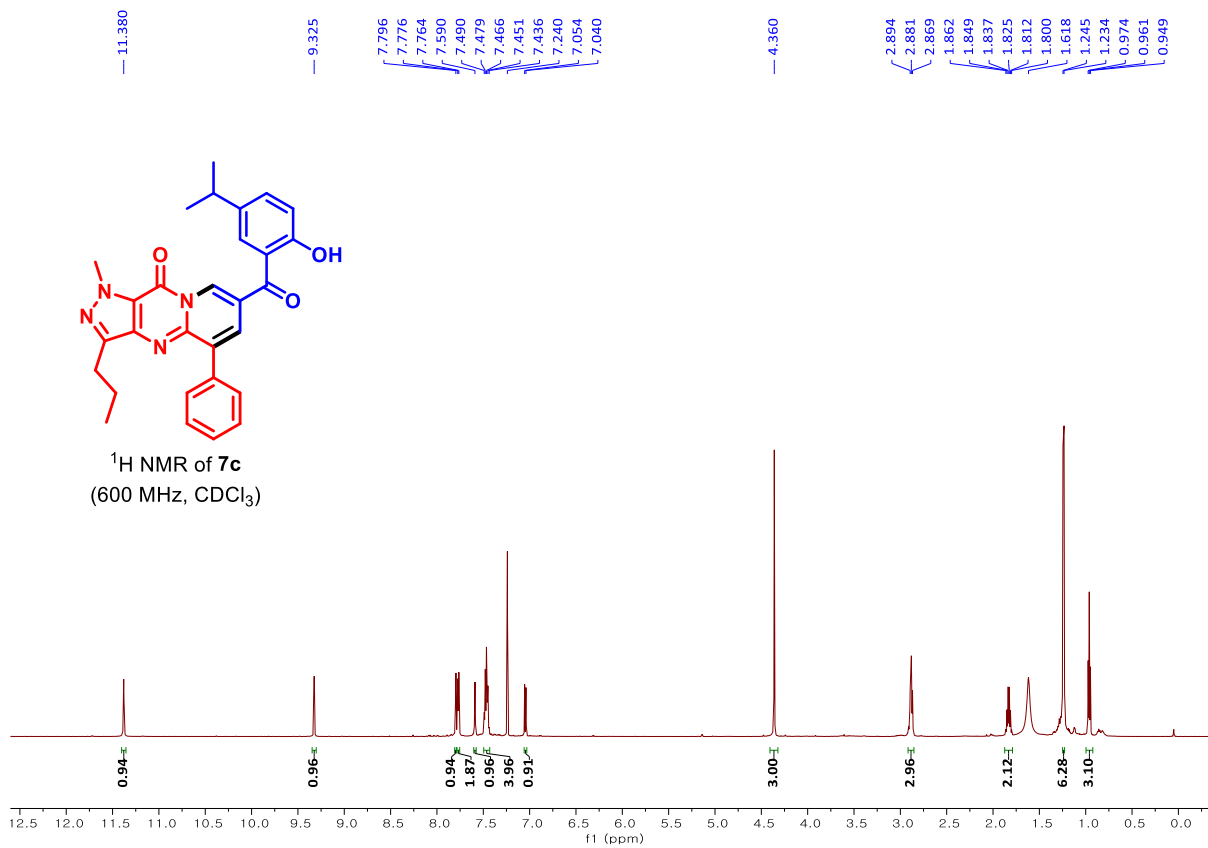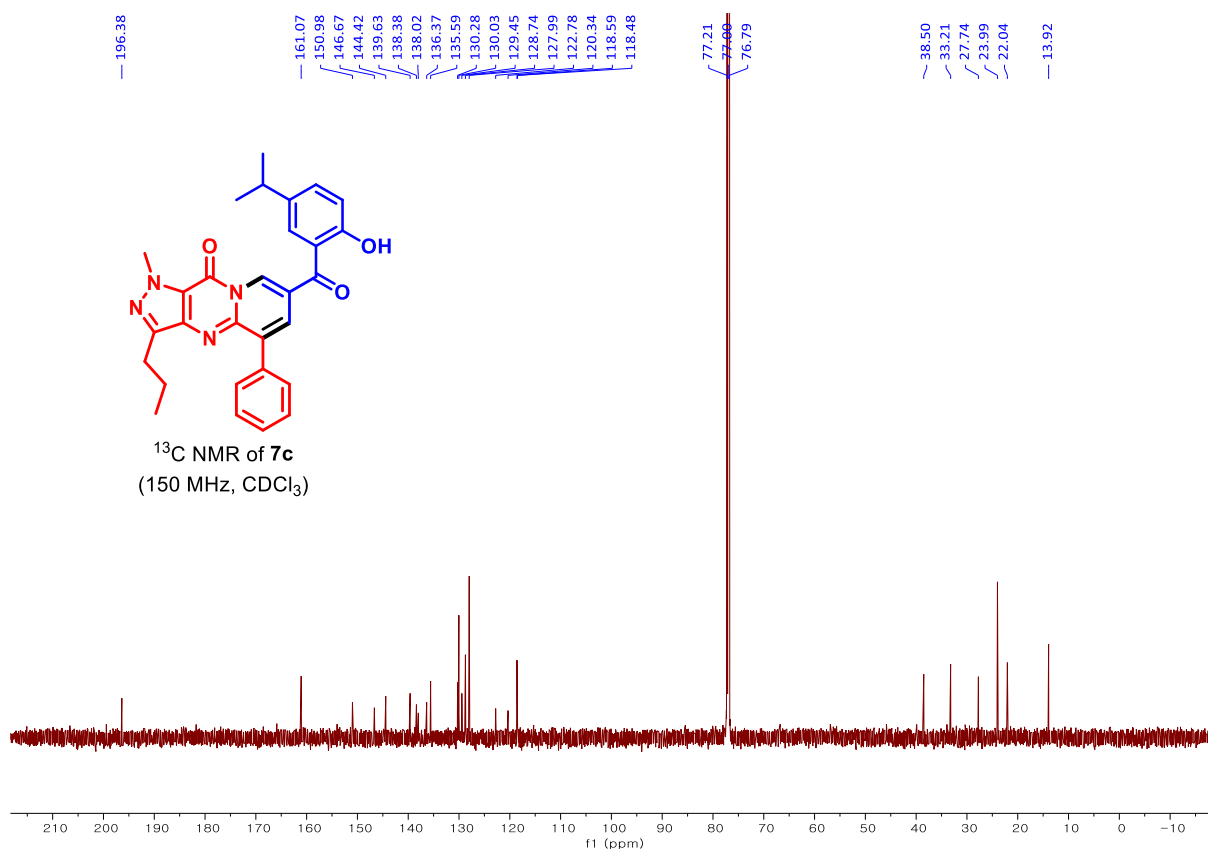

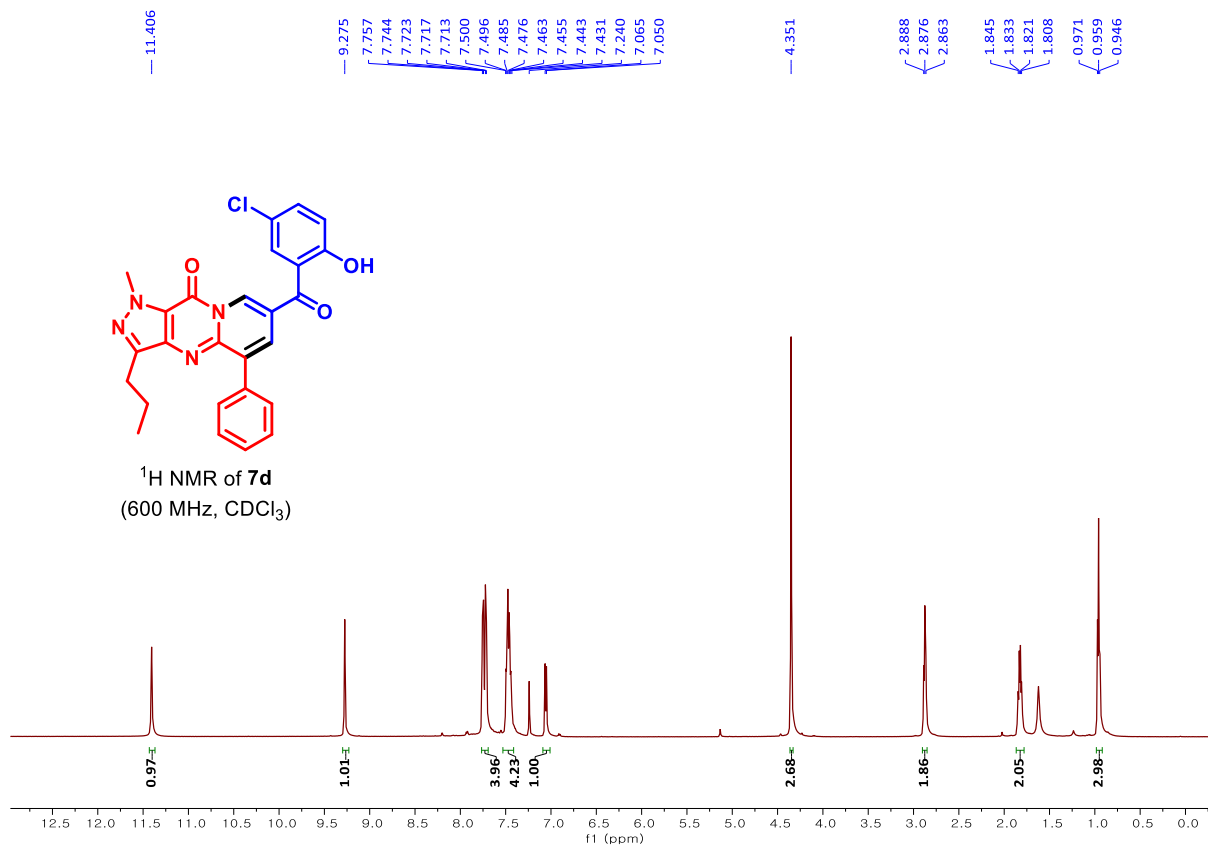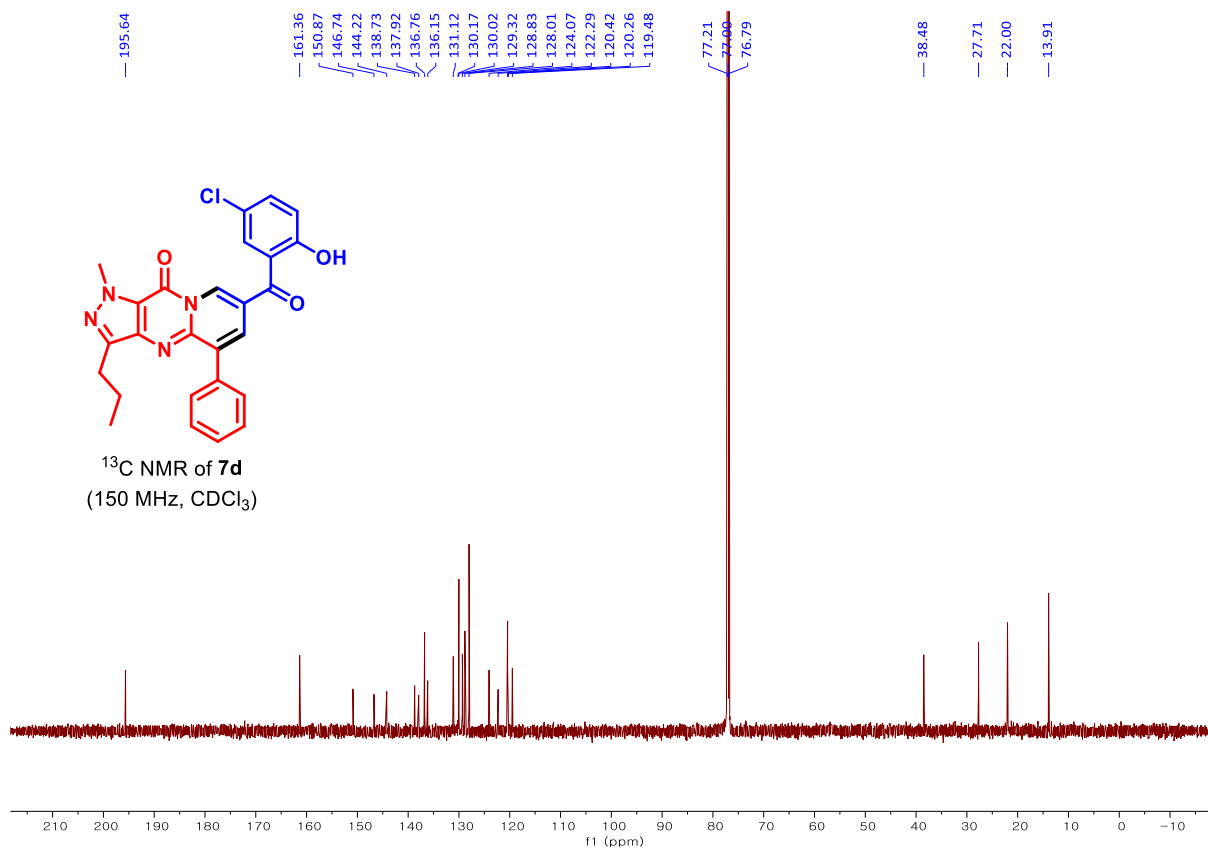

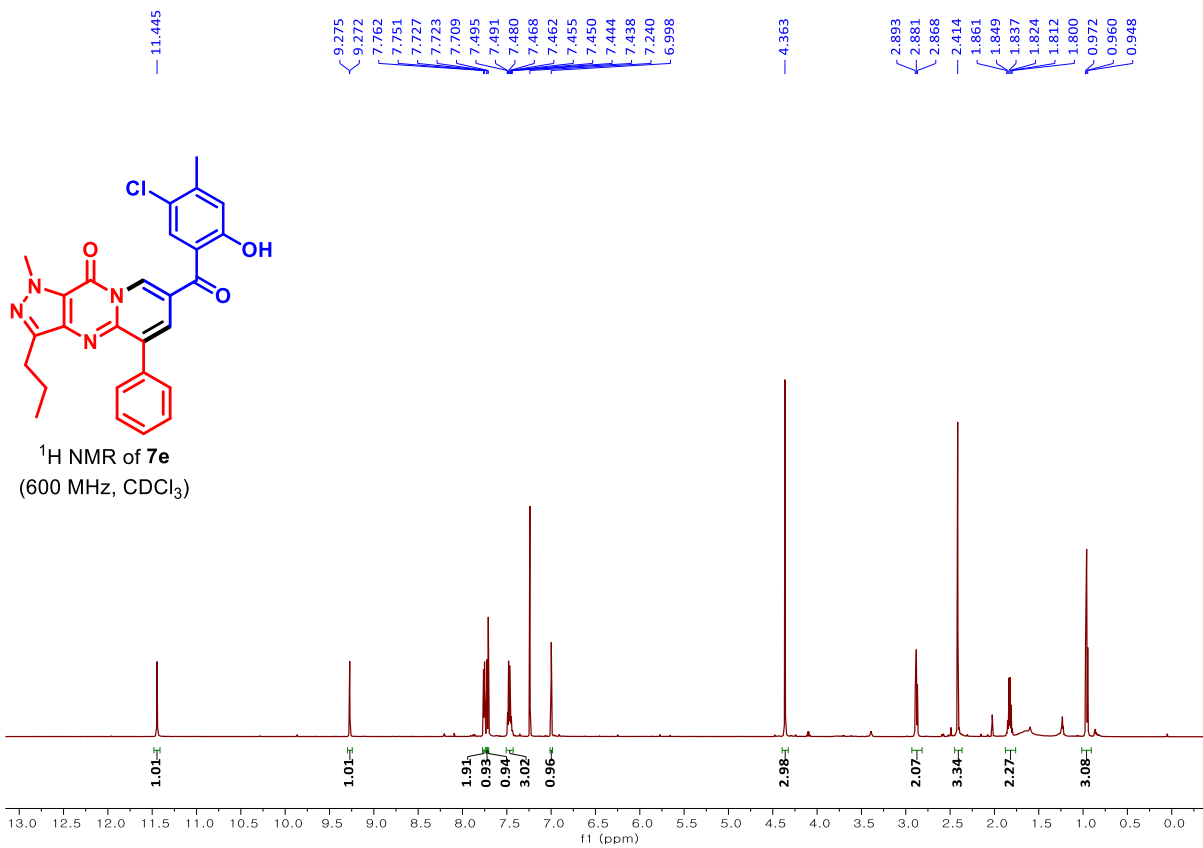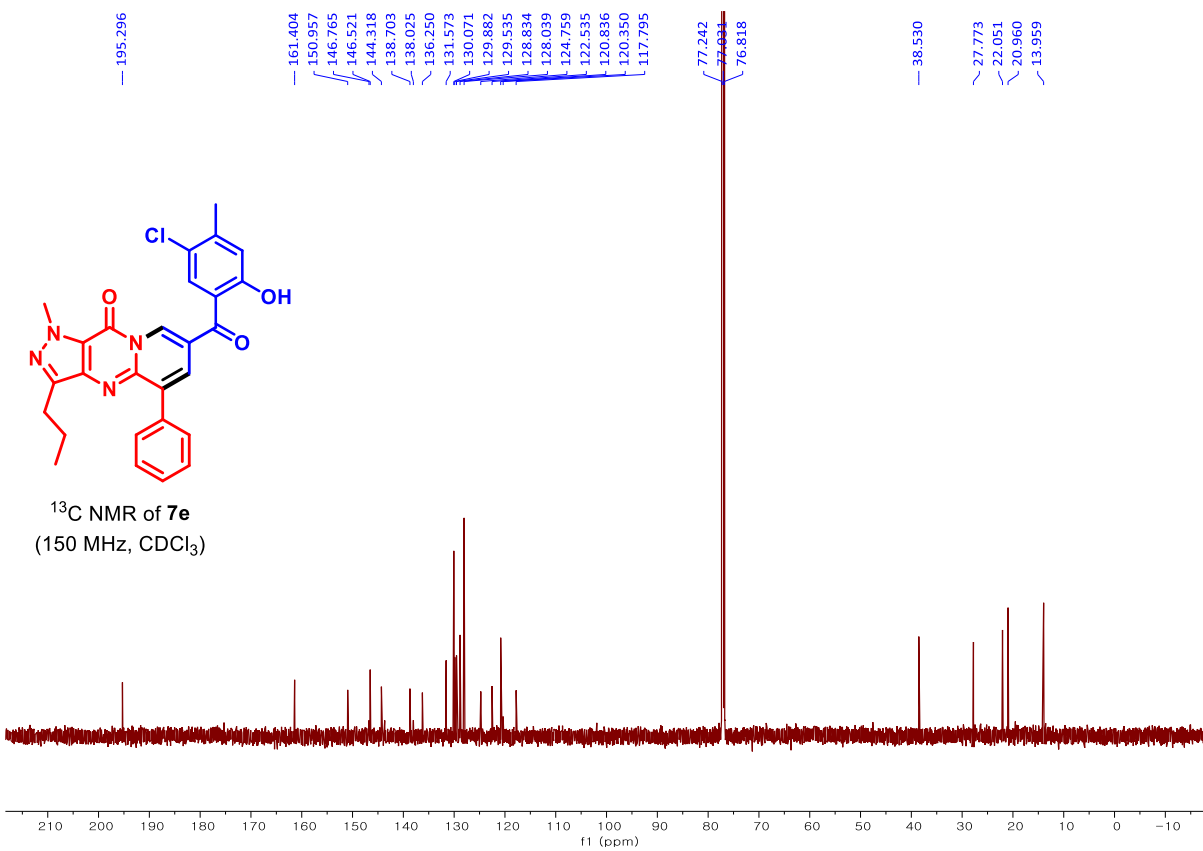

### X-ray structure and data for compound 3f

Empirical Formula  $C_{25}H_{16}FN_2O_3$ ,  $M = 410.39$ , Monoclinic, Space group  $P-1$ ,  $a = 7.147(6)$  Å,  $b = 11.942(10)$  Å,  $c = 12.279(13)$  Å,  $V = 889.9(14)$  Å<sup>3</sup>,  $Z = 2$ ,  $T = 223(2)$  K,  $\rho_{\text{calcd}} = 1.532$  Mg/m<sup>3</sup>,  $2\theta_{\text{max.}} = 25.242^\circ$ , Refinement of 281 parameters on 4538 independent reflections out of 21859 collected reflections ( $R_{\text{int}} = 0.1677$ ) led to  $R1 = 0.0580$  [ $I > 2\sigma(I)$ ],  $wR_2 = 0.1696$  (all data) and  $S = 1.032$  with the largest difference peak and hole of 0.313 and -0.188 e.Å<sup>-3</sup> respectively. The crystal structure has been deposited at the Cambridge Crystallographic Data Centre (CCDC 2142456). The data can be obtained free of charge via the Internet at [www.ccdc.cam.ac.uk/data\\_request/cif](http://www.ccdc.cam.ac.uk/data_request/cif).

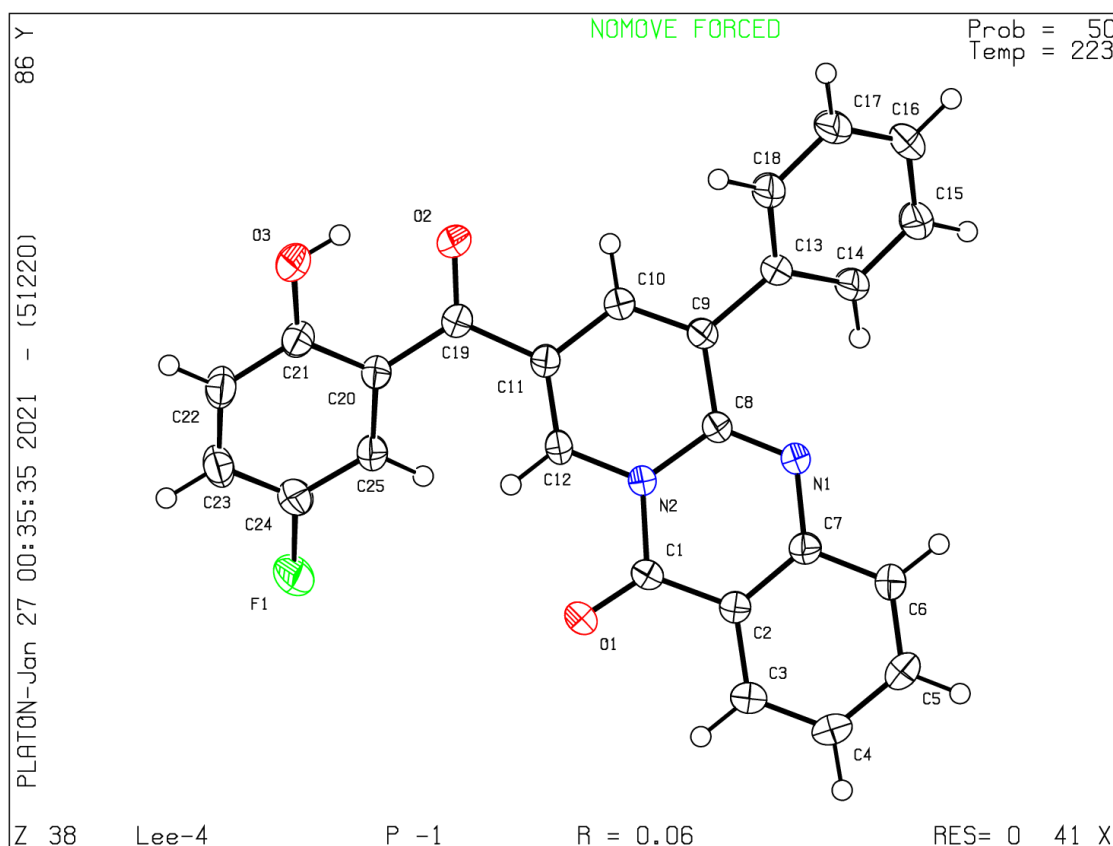

**Figure S1.** X-ray crystal structure of compound 3f.

**Table 1.** Crystal data and structure refinement for **3f**.

|                                   |                                                                 |                                                    |
|-----------------------------------|-----------------------------------------------------------------|----------------------------------------------------|
| Identification code               | <b>3f</b>                                                       |                                                    |
| Empirical formula                 | C <sub>25</sub> H <sub>15</sub> F N <sub>2</sub> O <sub>3</sub> |                                                    |
| Formula weight                    | 410.39                                                          |                                                    |
| Temperature                       | 223(2) K                                                        |                                                    |
| Wavelength                        | 0.71073 Å                                                       |                                                    |
| Crystal system                    | Triclinic                                                       |                                                    |
| Space group                       | P-1                                                             |                                                    |
| Unit cell dimensions              | a = 7.147(6) Å<br>b = 11.942(10) Å<br>c = 12.279(13) Å          | α = 61.56(3)°.<br>β = 87.07(3)°.<br>γ = 75.58(3)°. |
| Volume                            | 889.8(14) Å <sup>3</sup>                                        |                                                    |
| Z                                 | 2                                                               |                                                    |
| Density (calculated)              | 1.532 Mg/m <sup>3</sup>                                         |                                                    |
| Absorption coefficient            | 0.109 mm <sup>-1</sup>                                          |                                                    |
| F(000)                            | 424                                                             |                                                    |
| Crystal size                      | 0.220 x 0.180 x 0.060 mm <sup>3</sup>                           |                                                    |
| Theta range for data collection   | 1.892 to 28.754°.                                               |                                                    |
| Index ranges                      | -9 ≤ h ≤ 9, -16 ≤ k ≤ 16, -16 ≤ l ≤ 16                          |                                                    |
| Reflections collected             | 21859                                                           |                                                    |
| Independent reflections           | 4538 [R(int) = 0.1677]                                          |                                                    |
| Completeness to theta = 25.242°   | 99.9 %                                                          |                                                    |
| Absorption correction             | Semi-empirical from equivalents                                 |                                                    |
| Max. and min. transmission        | 0.7453 and 0.5901                                               |                                                    |
| Refinement method                 | Full-matrix least-squares on F <sup>2</sup>                     |                                                    |
| Data / restraints / parameters    | 4538 / 0 / 281                                                  |                                                    |
| Goodness-of-fit on F <sup>2</sup> | 1.032                                                           |                                                    |
| Final R indices [I > 2σ(I)]       | R1 = 0.0580, wR2 = 0.1509                                       |                                                    |
| R indices (all data)              | R1 = 0.0793, wR2 = 0.1696                                       |                                                    |
| Extinction coefficient            | n/a                                                             |                                                    |
| Largest diff. peak and hole       | 0.268 and -0.378 e.Å <sup>-3</sup>                              |                                                    |



**Table 2.** Atomic coordinates ( $\times 10^4$ ) and equivalent isotropic displacement parameters ( $\text{\AA}^2 \times 10^3$ ) for **3f**.  $U(\text{eq})$  is defined as one third of the trace of the orthogonalized  $U_{ij}$  tensor.

|       | x       | y        | z       | U(eq) |
|-------|---------|----------|---------|-------|
| O(1)  | 3306(2) | 4280(1)  | 3399(1) | 40(1) |
| C(1)  | 2897(2) | 5033(2)  | 3829(1) | 27(1) |
| C(2)  | 2477(2) | 6438(2)  | 3145(1) | 26(1) |
| C(3)  | 2444(3) | 7049(2)  | 1846(2) | 34(1) |
| C(4)  | 2034(3) | 8386(2)  | 1188(2) | 38(1) |
| C(5)  | 1720(3) | 9127(2)  | 1815(2) | 36(1) |
| C(6)  | 1770(3) | 8543(2)  | 3086(2) | 32(1) |
| C(7)  | 2115(2) | 7170(2)  | 3779(1) | 26(1) |
| N(1)  | 2023(2) | 6626(1)  | 5048(1) | 28(1) |
| C(8)  | 2292(2) | 5362(2)  | 5692(1) | 25(1) |
| C(9)  | 2127(2) | 4730(2)  | 7027(1) | 26(1) |
| C(10) | 2392(2) | 3413(2)  | 7652(1) | 28(1) |
| C(11) | 2917(2) | 2609(2)  | 7059(1) | 27(1) |
| C(12) | 3132(2) | 3189(2)  | 5831(2) | 27(1) |
| N(2)  | 2767(2) | 4534(1)  | 5146(1) | 25(1) |
| C(13) | 1696(2) | 5501(2)  | 7713(1) | 27(1) |
| C(14) | 312(2)  | 6686(2)  | 7283(2) | 32(1) |
| C(15) | -101(3) | 7319(2)  | 7997(2) | 36(1) |
| C(16) | 846(3)  | 6788(2)  | 9147(2) | 40(1) |
| C(17) | 2229(3) | 5617(2)  | 9581(2) | 41(1) |
| C(18) | 2660(3) | 4981(2)  | 8871(2) | 35(1) |
| C(19) | 3372(2) | 1160(2)  | 7850(2) | 28(1) |
| O(2)  | 3640(2) | 740(1)   | 8974(1) | 40(1) |
| C(20) | 3563(2) | 250(2)   | 7339(1) | 27(1) |
| C(21) | 4670(2) | -1052(2) | 8029(2) | 31(1) |
| C(22) | 4868(3) | -1928(2) | 7556(2) | 37(1) |
| C(23) | 3962(3) | -1557(2) | 6436(2) | 39(1) |
| C(24) | 2864(3) | -287(2)  | 5779(2) | 35(1) |
| C(25) | 2636(2) | 602(2)   | 6201(2) | 31(1) |
| O(3)  | 5611(2) | -1513(1) | 9141(1) | 42(1) |
| F(1)  | 1968(2) | 85(1)    | 4670(1) | 52(1) |

---

**Table 3.** Bond lengths [Å] and angles [°] for **3f**.

---

|             |          |
|-------------|----------|
| O(1)-C(1)   | 1.216(2) |
| C(1)-C(2)   | 1.430(2) |
| C(1)-N(2)   | 1.439(2) |
| C(2)-C(7)   | 1.397(2) |
| C(2)-C(3)   | 1.401(3) |
| C(3)-C(4)   | 1.360(3) |
| C(3)-H(3)   | 0.9400   |
| C(4)-C(5)   | 1.399(3) |
| C(4)-H(4)   | 0.9400   |
| C(5)-C(6)   | 1.372(3) |
| C(5)-H(5)   | 0.9400   |
| C(6)-C(7)   | 1.402(2) |
| C(6)-H(6)   | 0.9400   |
| C(7)-N(1)   | 1.379(2) |
| N(1)-C(8)   | 1.294(2) |
| C(8)-N(2)   | 1.409(2) |
| C(8)-C(9)   | 1.455(3) |
| C(9)-C(10)  | 1.347(2) |
| C(9)-C(13)  | 1.491(2) |
| C(10)-C(11) | 1.432(2) |
| C(10)-H(10) | 0.9400   |
| C(11)-C(12) | 1.347(3) |
| C(11)-C(19) | 1.481(2) |
| C(12)-N(2)  | 1.371(2) |
| C(12)-H(12) | 0.9400   |
| C(13)-C(14) | 1.380(2) |
| C(13)-C(18) | 1.389(3) |
| C(14)-C(15) | 1.386(3) |
| C(14)-H(14) | 0.9400   |
| C(15)-C(16) | 1.373(3) |
| C(15)-H(15) | 0.9400   |

|                |            |
|----------------|------------|
| C(16)-C(17)    | 1.368(3)   |
| C(16)-H(16)    | 0.9400     |
| C(17)-C(18)    | 1.385(3)   |
| C(17)-H(17)    | 0.9400     |
| C(18)-H(18)    | 0.9400     |
| C(19)-O(2)     | 1.229(2)   |
| C(19)-C(20)    | 1.471(2)   |
| C(20)-C(21)    | 1.401(2)   |
| C(20)-C(25)    | 1.402(3)   |
| C(21)-O(3)     | 1.346(2)   |
| C(21)-C(22)    | 1.396(3)   |
| C(22)-C(23)    | 1.369(3)   |
| C(22)-H(22)    | 0.9400     |
| C(23)-C(24)    | 1.368(3)   |
| C(23)-H(23)    | 0.9400     |
| C(24)-F(1)     | 1.354(2)   |
| C(24)-C(25)    | 1.360(3)   |
| C(25)-H(25)    | 0.9400     |
| O(3)-H(3A)     | 0.8300     |
|                |            |
| O(1)-C(1)-C(2) | 126.32(16) |
| O(1)-C(1)-N(2) | 120.31(15) |
| C(2)-C(1)-N(2) | 113.37(14) |
| C(7)-C(2)-C(3) | 121.54(16) |
| C(7)-C(2)-C(1) | 119.62(15) |
| C(3)-C(2)-C(1) | 118.84(15) |
| C(4)-C(3)-C(2) | 119.18(16) |
| C(4)-C(3)-H(3) | 120.4      |
| C(2)-C(3)-H(3) | 120.4      |
| C(3)-C(4)-C(5) | 119.78(17) |
| C(3)-C(4)-H(4) | 120.1      |
| C(5)-C(4)-H(4) | 120.1      |
| C(6)-C(5)-C(4) | 121.74(17) |
| C(6)-C(5)-H(5) | 119.1      |
| C(4)-C(5)-H(5) | 119.1      |
| C(5)-C(6)-C(7) | 119.36(16) |

|                   |            |
|-------------------|------------|
| C(5)-C(6)-H(6)    | 120.3      |
| C(7)-C(6)-H(6)    | 120.3      |
| N(1)-C(7)-C(2)    | 123.96(15) |
| N(1)-C(7)-C(6)    | 117.68(15) |
| C(2)-C(7)-C(6)    | 118.34(16) |
| C(8)-N(1)-C(7)    | 118.06(14) |
| N(1)-C(8)-N(2)    | 122.21(15) |
| N(1)-C(8)-C(9)    | 120.94(14) |
| N(2)-C(8)-C(9)    | 116.85(14) |
| C(10)-C(9)-C(8)   | 118.69(15) |
| C(10)-C(9)-C(13)  | 119.65(15) |
| C(8)-C(9)-C(13)   | 121.65(15) |
| C(9)-C(10)-C(11)  | 122.34(16) |
| C(9)-C(10)-H(10)  | 118.8      |
| C(11)-C(10)-H(10) | 118.8      |
| C(12)-C(11)-C(10) | 118.97(15) |
| C(12)-C(11)-C(19) | 122.68(15) |
| C(10)-C(11)-C(19) | 118.12(15) |
| C(11)-C(12)-N(2)  | 120.58(15) |
| C(11)-C(12)-H(12) | 119.7      |
| N(2)-C(12)-H(12)  | 119.7      |
| C(12)-N(2)-C(8)   | 122.40(15) |
| C(12)-N(2)-C(1)   | 114.99(13) |
| C(8)-N(2)-C(1)    | 122.60(13) |
| C(14)-C(13)-C(18) | 117.71(16) |
| C(14)-C(13)-C(9)  | 123.28(15) |
| C(18)-C(13)-C(9)  | 118.94(15) |
| C(13)-C(14)-C(15) | 120.55(16) |
| C(13)-C(14)-H(14) | 119.7      |
| C(15)-C(14)-H(14) | 119.7      |
| C(16)-C(15)-C(14) | 121.24(17) |
| C(16)-C(15)-H(15) | 119.4      |
| C(14)-C(15)-H(15) | 119.4      |
| C(17)-C(16)-C(15) | 118.77(17) |
| C(17)-C(16)-H(16) | 120.6      |
| C(15)-C(16)-H(16) | 120.6      |

|                   |            |
|-------------------|------------|
| C(16)-C(17)-C(18) | 120.43(17) |
| C(16)-C(17)-H(17) | 119.8      |
| C(18)-C(17)-H(17) | 119.8      |
| C(17)-C(18)-C(13) | 121.29(17) |
| C(17)-C(18)-H(18) | 119.4      |
| C(13)-C(18)-H(18) | 119.4      |
| O(2)-C(19)-C(20)  | 120.72(15) |
| O(2)-C(19)-C(11)  | 116.45(15) |
| C(20)-C(19)-C(11) | 122.80(15) |
| C(21)-C(20)-C(25) | 117.39(16) |
| C(21)-C(20)-C(19) | 119.22(16) |
| C(25)-C(20)-C(19) | 123.35(15) |
| O(3)-C(21)-C(22)  | 117.04(16) |
| O(3)-C(21)-C(20)  | 123.00(16) |
| C(22)-C(21)-C(20) | 119.95(17) |
| C(23)-C(22)-C(21) | 121.53(17) |
| C(23)-C(22)-H(22) | 119.2      |
| C(21)-C(22)-H(22) | 119.2      |
| C(24)-C(23)-C(22) | 117.88(17) |
| C(24)-C(23)-H(23) | 121.1      |
| C(22)-C(23)-H(23) | 121.1      |
| F(1)-C(24)-C(25)  | 119.26(16) |
| F(1)-C(24)-C(23)  | 118.09(16) |
| C(25)-C(24)-C(23) | 122.64(18) |
| C(24)-C(25)-C(20) | 120.58(16) |
| C(24)-C(25)-H(25) | 119.7      |
| C(20)-C(25)-H(25) | 119.7      |
| C(21)-O(3)-H(3A)  | 109.5      |

---

Symmetry transformations used to generate equivalent atoms:

**Table 4.** Anisotropic displacement parameters ( $\text{\AA}^2 \times 10^3$ ) for **3f**. The anisotropic displacement factor exponent takes the form:  $-2\pi^2 [ h^2 a^{*2} U^{11} + \dots + 2 h k a^* b^* U^{12} ]$

|       | U11   | U22   | U33   | U23    | U13    | U12    |
|-------|-------|-------|-------|--------|--------|--------|
| O(1)  | 65(1) | 29(1) | 28(1) | -18(1) | 5(1)   | -8(1)  |
| C(1)  | 34(1) | 26(1) | 23(1) | -14(1) | 2(1)   | -7(1)  |
| C(2)  | 30(1) | 24(1) | 24(1) | -11(1) | 1(1)   | -6(1)  |
| C(3)  | 45(1) | 32(1) | 24(1) | -14(1) | 3(1)   | -9(1)  |
| C(4)  | 51(1) | 35(1) | 22(1) | -8(1)  | 3(1)   | -11(1) |
| C(5)  | 44(1) | 25(1) | 30(1) | -6(1)  | 2(1)   | -9(1)  |
| C(6)  | 41(1) | 24(1) | 31(1) | -14(1) | 4(1)   | -10(1) |
| C(7)  | 28(1) | 25(1) | 24(1) | -11(1) | 1(1)   | -6(1)  |
| N(1)  | 40(1) | 22(1) | 24(1) | -12(1) | 2(1)   | -7(1)  |
| C(8)  | 30(1) | 23(1) | 24(1) | -12(1) | 1(1)   | -6(1)  |
| C(9)  | 31(1) | 24(1) | 23(1) | -13(1) | 0(1)   | -4(1)  |
| C(10) | 36(1) | 24(1) | 24(1) | -12(1) | 2(1)   | -7(1)  |
| C(11) | 33(1) | 21(1) | 26(1) | -11(1) | -1(1)  | -5(1)  |
| C(12) | 33(1) | 20(1) | 29(1) | -14(1) | 1(1)   | -5(1)  |
| N(2)  | 33(1) | 19(1) | 22(1) | -10(1) | 2(1)   | -5(1)  |
| C(13) | 34(1) | 25(1) | 23(1) | -13(1) | 3(1)   | -7(1)  |
| C(14) | 38(1) | 29(1) | 26(1) | -14(1) | -2(1)  | -3(1)  |
| C(15) | 42(1) | 31(1) | 35(1) | -18(1) | 2(1)   | -2(1)  |
| C(16) | 56(1) | 37(1) | 35(1) | -25(1) | 3(1)   | -8(1)  |
| C(17) | 58(1) | 36(1) | 28(1) | -18(1) | -8(1)  | -3(1)  |
| C(18) | 47(1) | 27(1) | 29(1) | -14(1) | -6(1)  | -2(1)  |
| C(19) | 35(1) | 22(1) | 26(1) | -10(1) | 1(1)   | -7(1)  |
| O(2)  | 65(1) | 26(1) | 24(1) | -9(1)  | -4(1)  | -7(1)  |
| C(20) | 34(1) | 22(1) | 27(1) | -12(1) | 4(1)   | -8(1)  |
| C(21) | 36(1) | 24(1) | 30(1) | -10(1) | 3(1)   | -7(1)  |
| C(22) | 44(1) | 23(1) | 42(1) | -15(1) | 6(1)   | -6(1)  |
| C(23) | 50(1) | 30(1) | 45(1) | -24(1) | 11(1)  | -13(1) |
| C(24) | 45(1) | 33(1) | 33(1) | -19(1) | 3(1)   | -14(1) |
| C(25) | 38(1) | 24(1) | 31(1) | -14(1) | 0(1)   | -8(1)  |
| O(3)  | 57(1) | 26(1) | 32(1) | -10(1) | -7(1)  | 1(1)   |
| F(1)  | 76(1) | 45(1) | 42(1) | -27(1) | -11(1) | -13(1) |

---

**Table 5.** Hydrogen coordinates ( $\times 10^4$ ) and isotropic displacement parameters ( $\text{\AA}^2 \times 10^{-3}$ ) for **3f**.

---

|       | x     | y     | z     | U(eq) |
|-------|-------|-------|-------|-------|
| H(3)  | 2701  | 6541  | 1435  | 41    |
| H(4)  | 1963  | 8811  | 315   | 46    |
| H(5)  | 1467  | 10049 | 1352  | 43    |
| H(6)  | 1576  | 9059  | 3489  | 38    |
| H(10) | 2226  | 3008  | 8508  | 33    |
| H(12) | 3537  | 2668  | 5439  | 32    |
| H(14) | -356  | 7068  | 6498  | 38    |
| H(15) | -1046 | 8126  | 7688  | 43    |
| H(16) | 549   | 7221  | 9627  | 48    |
| H(17) | 2891  | 5242  | 10366 | 49    |
| H(18) | 3625  | 4183  | 9179  | 42    |
| H(22) | 5641  | -2793 | 8018  | 45    |
| H(23) | 4091  | -2155 | 6127  | 46    |
| H(25) | 1849  | 1459  | 5725  | 37    |
| H(3A) | 5248  | -969  | 9395  | 63    |

---

**Table 6.** Torsion angles [°] for **3f**.

---

|                        |             |
|------------------------|-------------|
| O(1)-C(1)-C(2)-C(7)    | -177.14(16) |
| N(2)-C(1)-C(2)-C(7)    | 3.8(2)      |
| O(1)-C(1)-C(2)-C(3)    | 2.7(3)      |
| N(2)-C(1)-C(2)-C(3)    | -176.30(14) |
| C(7)-C(2)-C(3)-C(4)    | -0.5(3)     |
| C(1)-C(2)-C(3)-C(4)    | 179.61(16)  |
| C(2)-C(3)-C(4)-C(5)    | 2.2(3)      |
| C(3)-C(4)-C(5)-C(6)    | -1.4(3)     |
| C(4)-C(5)-C(6)-C(7)    | -1.1(3)     |
| C(3)-C(2)-C(7)-N(1)    | 176.25(15)  |
| C(1)-C(2)-C(7)-N(1)    | -3.9(2)     |
| C(3)-C(2)-C(7)-C(6)    | -1.9(2)     |
| C(1)-C(2)-C(7)-C(6)    | 177.94(14)  |
| C(5)-C(6)-C(7)-N(1)    | -175.63(15) |
| C(5)-C(6)-C(7)-C(2)    | 2.7(2)      |
| C(2)-C(7)-N(1)-C(8)    | 0.1(2)      |
| C(6)-C(7)-N(1)-C(8)    | 178.35(14)  |
| C(7)-N(1)-C(8)-N(2)    | 3.3(2)      |
| C(7)-N(1)-C(8)-C(9)    | -177.14(14) |
| N(1)-C(8)-C(9)-C(10)   | 179.02(15)  |
| N(2)-C(8)-C(9)-C(10)   | -1.4(2)     |
| N(1)-C(8)-C(9)-C(13)   | -1.7(2)     |
| N(2)-C(8)-C(9)-C(13)   | 177.96(14)  |
| C(8)-C(9)-C(10)-C(11)  | 2.9(2)      |
| C(13)-C(9)-C(10)-C(11) | -176.39(14) |
| C(9)-C(10)-C(11)-C(12) | -0.8(2)     |
| C(9)-C(10)-C(11)-C(19) | 173.78(15)  |
| C(10)-C(11)-C(12)-N(2) | -3.0(2)     |
| C(19)-C(11)-C(12)-N(2) | -177.34(14) |
| C(11)-C(12)-N(2)-C(8)  | 4.7(2)      |
| C(11)-C(12)-N(2)-C(1)  | -175.11(14) |
| N(1)-C(8)-N(2)-C(12)   | 177.22(14)  |
| C(9)-C(8)-N(2)-C(12)   | -2.4(2)     |
| N(1)-C(8)-N(2)-C(1)    | -3.0(2)     |



|                         |             |
|-------------------------|-------------|
| C(9)-C(8)-N(2)-C(1)     | 177.36(13)  |
| O(1)-C(1)-N(2)-C(12)    | 0.0(2)      |
| C(2)-C(1)-N(2)-C(12)    | 179.09(13)  |
| O(1)-C(1)-N(2)-C(8)     | -179.80(15) |
| C(2)-C(1)-N(2)-C(8)     | -0.7(2)     |
| C(10)-C(9)-C(13)-C(14)  | -137.19(18) |
| C(8)-C(9)-C(13)-C(14)   | 43.5(2)     |
| C(10)-C(9)-C(13)-C(18)  | 39.7(2)     |
| C(8)-C(9)-C(13)-C(18)   | -139.64(17) |
| C(18)-C(13)-C(14)-C(15) | -0.7(3)     |
| C(9)-C(13)-C(14)-C(15)  | 176.24(16)  |
| C(13)-C(14)-C(15)-C(16) | -0.1(3)     |
| C(14)-C(15)-C(16)-C(17) | 0.5(3)      |
| C(15)-C(16)-C(17)-C(18) | -0.1(3)     |
| C(16)-C(17)-C(18)-C(13) | -0.7(3)     |
| C(14)-C(13)-C(18)-C(17) | 1.1(3)      |
| C(9)-C(13)-C(18)-C(17)  | -175.96(17) |
| C(12)-C(11)-C(19)-O(2)  | 160.47(17)  |
| C(10)-C(11)-C(19)-O(2)  | -13.9(2)    |
| C(12)-C(11)-C(19)-C(20) | -17.6(3)    |
| C(10)-C(11)-C(19)-C(20) | 168.00(15)  |
| O(2)-C(19)-C(20)-C(21)  | -22.0(2)    |
| C(11)-C(19)-C(20)-C(21) | 156.03(16)  |
| O(2)-C(19)-C(20)-C(25)  | 155.81(17)  |
| C(11)-C(19)-C(20)-C(25) | -26.2(3)    |
| C(25)-C(20)-C(21)-O(3)  | -179.22(16) |
| C(19)-C(20)-C(21)-O(3)  | -1.3(3)     |
| C(25)-C(20)-C(21)-C(22) | 2.1(2)      |
| C(19)-C(20)-C(21)-C(22) | -179.92(15) |
| O(3)-C(21)-C(22)-C(23)  | 179.68(17)  |
| C(20)-C(21)-C(22)-C(23) | -1.6(3)     |
| C(21)-C(22)-C(23)-C(24) | 0.7(3)      |
| C(22)-C(23)-C(24)-F(1)  | 179.91(16)  |
| C(22)-C(23)-C(24)-C(25) | -0.5(3)     |
| F(1)-C(24)-C(25)-C(20)  | -179.27(16) |
| C(23)-C(24)-C(25)-C(20) | 1.1(3)      |

|                         |             |
|-------------------------|-------------|
| C(21)-C(20)-C(25)-C(24) | -1.9(3)     |
| C(19)-C(20)-C(25)-C(24) | -179.76(16) |

---

Symmetry transformations used to generate equivalent atoms:

**Table 7.** Hydrogen bonds for **3f** [Å and °].

| D-H...A             | d(D-H) | d(H...A) | d(D...A) | <(DHA) |
|---------------------|--------|----------|----------|--------|
| O(3)-H(3A)...O(2)#1 | 0.83   | 2.35     | 2.985(3) | 134.1  |
| O(3)-H(3A)...O(2)   | 0.83   | 1.91     | 2.623(3) | 143.7  |

---

Symmetry transformations used to generate equivalent atoms:

#1 -x+1,-y,-z+2

### Procedure for optical properties

UV–Vis and photoluminescence spectra were recorded using a UV 3220 spectrometer (Optizen) and spectrofluorometer (HITACHI) F-2700 equipped with a Xe arc lamp, respectively. A stock solution of **3a**, **3f**, **3j**, **3k**, and **7a** compounds (1  $\mu\text{M}$ ) was prepared in ethanol:water (8:2). Stock solutions of various cations (100  $\mu\text{M}$ ;  $\text{Ag}^+$ ,  $\text{Al}^{3+}$ ,  $\text{Ba}^{2+}$ ,  $\text{Ca}^{2+}$ ,  $\text{Cd}^{2+}$ ,  $\text{Ce}^{3+}$ ,  $\text{Co}^{2+}$ ,  $\text{Cr}^{3+}$ ,  $\text{Cu}^{2+}$ ,  $\text{Fe}^{3+}$ ,  $\text{Hg}^{2+}$ ,  $\text{Ir}^{3+}$ ,  $\text{Mg}^{2+}$ ,  $\text{Mn}^{2+}$ ,  $\text{Na}^+$ ,  $\text{Ni}^{2+}$ ,  $\text{Pb}^{2+}$ ,  $\text{Sn}^{2+}$ ,  $\text{Sr}^{2+}$ , and  $\text{Zn}^{2+}$ ) and common anions (100  $\mu\text{M}$ ;  $\text{Br}^-$ ,  $\text{Cl}^-$ ,  $\text{CO}_3^{2-}$ ,  $\text{I}^-$ ,  $\text{NO}_3^{2-}$ ,  $\text{PO}_4^{3-}$ ,  $\text{SO}_4^{2-}$ , and  $\text{S}^{2-}$ ) were prepared in deionized water. Before the spectroscopic measurements, test solutions were prepared in 1990  $\mu\text{L}$  of ethanol:water mixed with 5  $\mu\text{L}$  stock solutions of **3a** (1  $\mu\text{M}$ ) and 5  $\mu\text{L}$  of each metal ions (100  $\mu\text{M}$ ) stock into cuvettes with the final volume of 2.0 mL, respectively.  $\text{Fe}^{3+}$  and  $\text{Ag}^+$  metal ions (0 – 100  $\mu\text{M}$ ) were detected by adding a different aliquot of stock solution with **3a** (1  $\mu\text{M}$ ). For  $\text{Fe}^{3+}$  and  $\text{Ag}^+$  competitive experimental procedures, above conditions were followed. 5  $\mu\text{L}$  of cations or anions solution (100  $\mu\text{M}$ ) with 5  $\mu\text{L}$  of **3a** (1  $\mu\text{M}$ ) was taken and added into in 1990  $\mu\text{L}$  of ethanol:water (8:2) solution. For PL interference studies, 5  $\mu\text{L}$  of the cations and anions solutions (100  $\mu\text{M}$ ) were individually added to the above solution. All UV–Vis spectra were recorded at room temperature after the addition of samples for a few seconds. All the photoluminescence measurements were carried out after 2 min of incubation at 366 nm ( $\lambda_{\text{ex}}$ ) emission wavelength range from 380 – 700 nm with 5 nm of slit width, 250 V of photomultiplier tube voltage, and a scan speed of 240 nm/min.

### Calculation of the photoluminescence quantum yield

The solution was diluted to keep the absorption intensity below 0.1 and the excitation wavelength set to 366 nm. After that, solutions for absorption and emission measurements were carried out in a 1  $\times$  1 cm quartz cuvette. Quantum yield (QY) was measured using a fluorescence spectrophotometer F-7000 (Hitachi). Photoluminescence QY can be calculated

using the following equation:

$$QY = \frac{\int L_{emission}}{\int E_{solvent} - \int E_{sample}}$$

Here, QY was the quantum yield and  $L_{emission}$  was the photoluminescence emission spectrum of the sample.  $E_{sample}$  was the spectrum of light used to excite the sample and  $E_{solvent}$  was the spectrum of light used to excite only the solvent of the sphere, collected using a sphere.

### Interference effect

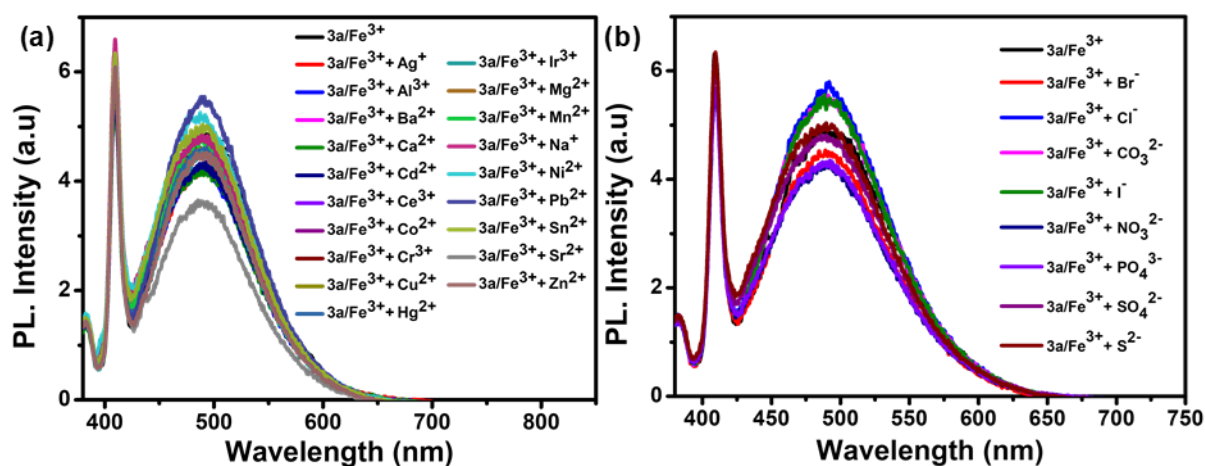

**Figure S2.** PL spectra of **3a**/Fe<sup>3+</sup> (**3a**; 1  $\mu$ M and Fe<sup>3+</sup>;100  $\mu$ M) with the addition of (a) various cations (Ag<sup>+</sup>, Al<sup>3+</sup>, Ba<sup>2+</sup>, Ca<sup>2+</sup>, Cd<sup>2+</sup>, Ce<sup>3+</sup>, Co<sup>2+</sup>, Cr<sup>3+</sup>, Cu<sup>2+</sup>, Hg<sup>2+</sup>, Ir<sup>3+</sup>, Mg<sup>2+</sup>, Mn<sup>2+</sup>, Na<sup>+</sup>, Ni<sup>2+</sup>, Pb<sup>2+</sup>, Sn<sup>2+</sup>, Sr<sup>2+</sup>, and Zn<sup>2+</sup>; 100  $\mu$ M) and (b) various anions (Br<sup>-</sup>, Cl<sup>-</sup>, CO<sub>3</sub><sup>2-</sup>, I<sup>-</sup>, NO<sub>3</sub><sup>2-</sup>, PO<sub>4</sub><sup>3-</sup>, SO<sub>4</sub><sup>2-</sup>, and S<sup>2-</sup>; 100  $\mu$ M) in ethanol:water (8:2) solution ( $\lambda_{ex}$  = 366 nm;  $\lambda_{em}$  = 490 nm).

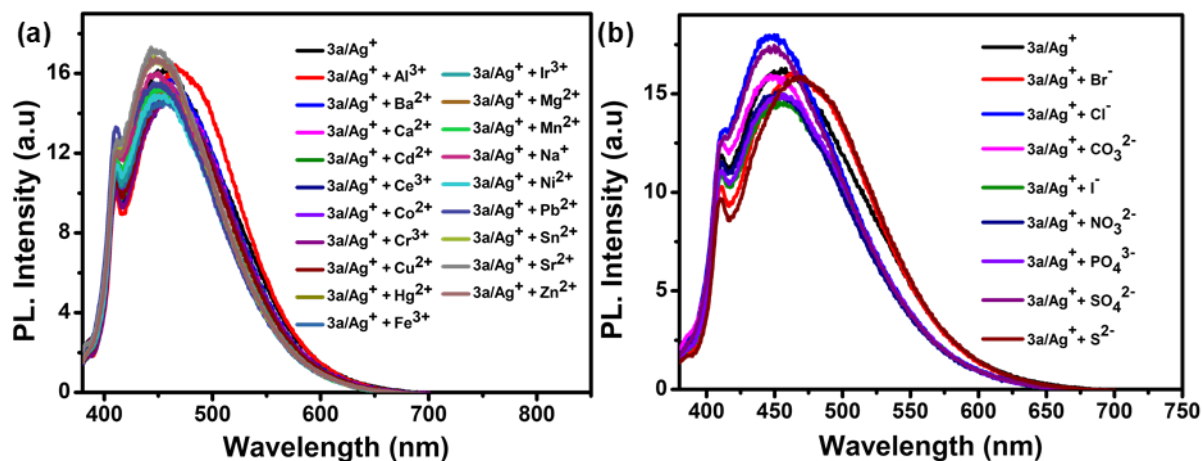

**Figure S3.** PL spectra of **3a**/Ag<sup>+</sup> (**3a**;1 μM and Ag<sup>+</sup>;100 μM) with the addition of (a) various cations (Al<sup>3+</sup>, Ba<sup>2+</sup>, Ca<sup>2+</sup>, Cd<sup>2+</sup>, Ce<sup>3+</sup>, Co<sup>2+</sup>, Cr<sup>3+</sup>, Cu<sup>2+</sup>, Hg<sup>2+</sup>, Fe<sup>3+</sup>, Ir<sup>3+</sup>, Mg<sup>2+</sup>, Mn<sup>2+</sup>, Na<sup>+</sup>, Ni<sup>2+</sup>, Pb<sup>2+</sup>, Sn<sup>2+</sup>, Sr<sup>2+</sup>, and Zn<sup>2+</sup>; 100 μM) and (b) various anions (Br<sup>-</sup>, Cl<sup>-</sup>, CO<sub>3</sub><sup>2-</sup>, I<sup>-</sup>, NO<sub>3</sub><sup>2-</sup>, PO<sub>4</sub><sup>3-</sup>, SO<sub>4</sub><sup>2-</sup>, and S<sup>2-</sup>; 100 μM) in ethanol:water (8:2) solution ( $\lambda_{\text{ex}} = 366$  nm;  $\lambda_{\text{em}} = 490$  nm).
